# Supplementary material for: A Causal Role for the Cortical Frontal Eye Fields in Microsaccade Deployment
Source: PLoS Biol. 2016 Aug 10;14(8):e1002531. doi: 10.1371/journal.pbio.1002531 (PMC4980061; doi:10.1371/journal.pbio.1002531)
Supplement: S1 Data — (XLSX) [file pbio.1002531.s001.xlsx]

## Sheet: Sheet1
Figure 1a							Figure 1b							Figure 1c
Ipsilesional			Contralesional				Ipsilesional			Contralesional				Ipsilesional & Pre-cue period			Contralesional & Pre-cue period
Amplitude (˚)	FEF warm	FEF cool	Amplitude (˚)	FEF warm	FEF cool		Monkey & Inactivation condition	∆ Amplitude (˚)	p-value	Monkey & Inactivation condition	∆ Amplitude (˚)	p-value		Inactivation condition	∆ Amplitude (˚)	p-value	Inactivation condition	∆ Amplitude (˚)	p-value
0	0	0	0	0	0		GBr	0.1148	0	GBr	-0.0113	0.8533		Unilateral	0.0337	0.0011	Unilateral	0.0519	0
0.1	1.53	1.14	0.1	0.88	0.32		DZr	0.1128	0	DZr	0.1641	0					Bilateral	0.249	0
0.2	14.8	12.3	0.2	14.33	4.86		OZr	0.36	0	OZr	0.0338	0.7884
0.3	18.57	16.19	0.3	19.09	10.04		DZl	0.1467	0	DZl	0.0684	0		Ipsilesional & Rebound period			Contralesional & Rebound period
0.4	14.83	14.93	0.4	14.74	11.55		OZl	-0.0153	0.4162	OZl	0.006	0.8019		Inactivation condition	∆ Amplitude (˚)	p-value	Inactivation condition	∆ Amplitude (˚)	p-value
0.5	10.84	11.04	0.5	9.86	11.51		DZbi (left)	0.2821	0	DZbi (right)	0.3072	0		Unilateral	0.0638	0	Unilateral	0.1363	0
0.6	7.87	7.74	0.6	6.96	10.6		OZbi (left)	0.3515	0	OZbi (right)	0.2793	0					Bilateral	0.2874	0
0.7	5.92	5.33	0.7	6.55	7.57
0.8	4.68	5.12	0.8	4.76	6.45
0.9	4	4.99	0.9	3.58	6.29
1	2.82	3.93	1	2.27	5.3
1.1	1.92	2.28	1.1	1.84	4.62
1.2	1.67	1.65	1.2	2.09	3.67
1.3	1.28	1.52	1.3	1.47	2.99
1.4	1.21	1.73	1.4	1.56	2.99
1.5	1.23	1.27	1.5	1.2	1.87
1.6	1.25	1.35	1.6	1.07	1.99
1.7	0.98	0.89	1.7	0.98	1.71
1.8	0.71	0.97	1.8	1.07	1.16
1.9	0.69	0.68	1.9	0.95	0.72
2	0.67	0.93	2	0.73	0.76
2.1	0.43	0.55	2.1	0.77	0.56
2.2	0.28	0.63	2.2	0.63	0.48
2.3	0.38	0.3	2.3	0.32	0.64
2.4	0.18	0.51	2.4	0.7	0.44
2.5	0.43	0.59	2.5	0.43	0.08
2.6	0.21	0.38	2.6	0.32	0.36
2.7	0.21	0.34	2.7	0.32	0.12
2.8	0.21	0.42	2.8	0.18	0.2
2.9	0.2	0.3	2.9	0.34	0.16
3	0	0	3	0	0
