# Supplementary material for: A Causal Role for the Cortical Frontal Eye Fields in Microsaccade Deployment
Source: PLoS Biol. 2016 Aug 10;14(8):e1002531. doi: 10.1371/journal.pbio.1002531 (PMC4980061; doi:10.1371/journal.pbio.1002531)
Supplement: S4 Data — (XLSX) [file pbio.1002531.s004.xlsx]

## Sheet: Sheet1
Figure 4a				Figure 4b																	Figure 4c
Radial fixation error in precue period (˚)	FEF warm	FEF cool		FEF warm (low)				FEF warm (high)				FEF cool (low)				FEF cool (high)					Monkey & Inactivation condition	% change of rate rebound using FEF warm (high) and FEF cool (low)	p-value
0	3.1222	0.3548		Time from cue onset (s)	Rate (microsaccades/s)	95% confidence intervals (upper)	95% confidence intervals (lower)	Time from cue onset (s)	Rate (microsaccades/s)	95% confidence intervals (upper)	95% confidence intervals (lower)	Time from cue onset (s)	Rate (microsaccades/s)	95% confidence intervals (upper)	95% confidence intervals (lower)	Time from cue onset (s)	Rate (microsaccades/s)	95% confidence intervals (upper)	95% confidence intervals (lower)		GBr	-17.81	1.07663e-06
0.1	14.0833	1.7738		-0.4	1.64168	1.78393	1.50327	-0.4	1.46117	1.78393	1.33856	-0.4	1.46019	1.78393	1.2884	-0.4	1.36907	1.78393	1.20116		DZr	-49.35	2.02542e-10
0.2	17.3826	3.5033		-0.395	1.66474	1.81469	1.52249	-0.395	1.46117	1.81469	1.33515	-0.395	1.49323	1.81469	1.32144	-0.395	1.35615	1.81469	1.20116		OZr	-64.91	2.53131e-13
0.3	16.3198	5.9424		-0.39	1.69166	1.83775	1.55279	-0.39	1.4748	1.83775	1.34877	-0.39	1.46019	1.83775	1.2884	-0.39	1.33678	1.83775	1.18179		DZl	-30.85	4.00229e-10
0.4	13.3525	7.6275		-0.385	1.66859	1.81084	1.53018	-0.385	1.42711	1.81084	1.30109	-0.385	1.42716	1.81084	1.25537	-0.385	1.29803	1.81084	1.13658		OZl	-24.73	2.97056e-06
0.5	9.2781	11.1752		-0.38	1.63014	1.7724	1.48789	-0.38	1.43052	1.7724	1.31131	-0.38	1.39412	1.7724	1.23555	-0.38	1.31095	1.7724	1.14304		DZbi (left)	-53.51	0
0.6	7.3295	10.3326		-0.375	1.63399	1.78393	1.50327	-0.375	1.42711	1.78393	1.30109	-0.375	1.34126	1.78393	1.17608	-0.375	1.25283	1.78393	1.09784		OZbi (left)	-67.43	0
0.7	5.0266	10.1109		-0.37	1.59554	1.74933	1.45713	-0.37	1.40668	1.74933	1.28406	-0.37	1.34126	1.74933	1.17608	-0.37	1.23991	1.74933	1.07846
0.8	3.543	9.9335		-0.365	1.58016	1.72626	1.4456	-0.365	1.41689	1.72626	1.29768	-0.365	1.36769	1.72626	1.20251	-0.365	1.1947	1.72626	1.04617
0.9	2.4579	8.7361		-0.36	1.55325	1.69166	1.41484	-0.36	1.40668	1.69166	1.28747	-0.36	1.36769	1.69166	1.20912	-0.36	1.22699	1.69166	1.06555
1	1.7493	7.0067		-0.355	1.55709	1.69935	1.41869	-0.355	1.37943	1.69935	1.25681	-0.355	1.33465	1.69935	1.17608	-0.355	1.1947	1.69935	1.04617
1.1	0.9743	5.4989		-0.35	1.52249	1.66474	1.39232	-0.35	1.39646	1.66474	1.27384	-0.35	1.33465	1.66474	1.16287	-0.35	1.18179	1.66474	1.0268
1.2	0.7529	4.2572		-0.345	1.52634	1.66859	1.39562	-0.345	1.38283	1.66859	1.26022	-0.345	1.30823	1.66859	1.14875	-0.345	1.18179	1.66859	1.03326
1.3	0.465	3.1042		-0.34	1.51096	1.64552	1.37639	-0.34	1.39305	1.64552	1.27725	-0.34	1.24215	1.64552	1.08358	-0.34	1.16242	1.64552	1.00743
1.4	0.3986	2.0843		-0.335	1.49942	1.64168	1.3687	-0.335	1.39646	1.64168	1.27384	-0.335	1.23555	1.64168	1.07697	-0.335	1.18825	1.64168	1.0268
1.5	0.1993	1.5965		-0.33	1.52249	1.65994	1.39177	-0.33	1.39646	1.65994	1.27044	-0.33	1.29501	1.65994	1.13644	-0.33	1.1947	1.65994	1.03972
1.6	0.2879	1.3304		-0.325	1.47251	1.61393	1.34564	-0.325	1.36921	1.61393	1.25341	-0.325	1.31483	1.61393	1.14979	-0.325	1.22054	1.61393	1.06555
1.7	0.1993	1.1973		-0.32	1.45713	1.59938	1.33026	-0.32	1.36921	1.59938	1.24659	-0.32	1.30823	1.59938	1.14305	-0.32	1.18179	1.59938	1.0268
1.8	0.2657	0.5765		-0.315	1.44175	1.57632	1.31103	-0.315	1.34877	1.57632	1.23638	-0.315	1.34126	1.57632	1.16947	-0.315	1.18179	1.57632	1.02723
1.9	0.2436	0.5322		-0.31	1.45713	1.59938	1.32257	-0.31	1.31131	1.59938	1.1921	-0.31	1.34787	1.59938	1.18269	-0.31	1.16242	1.59938	1.00743
2	0.2879	0.3991		-0.305	1.43022	1.57247	1.2995	-0.305	1.29428	1.57247	1.17847	-0.305	1.36108	1.57247	1.1959	-0.305	1.1495	1.57247	1.00097
2.1	0.2879	0.3991		-0.3	1.46482	1.60707	1.3341	-0.3	1.27384	1.60707	1.15463	-0.3	1.36108	1.60707	1.1893	-0.3	1.18825	1.60707	1.03326
2.2	0.2657	0.2217		-0.295	1.37255	1.50711	1.24567	-0.295	1.22616	1.50711	1.10695	-0.295	1.3743	1.50711	1.20912	-0.295	1.16887	1.50711	1.02034
2.3	0.31	0.2217		-0.29	1.34564	1.4802	1.22261	-0.29	1.22616	1.4802	1.10695	-0.29	1.3743	1.4802	1.20912	-0.29	1.12367	1.4802	0.968679
2.4	0.2214	0.2217		-0.285	1.33795	1.47636	1.21492	-0.285	1.20232	1.47636	1.08992	-0.285	1.40073	1.47636	1.22894	-0.285	1.15596	1.47636	1.00743
2.5	0.0886	0.1774		-0.28	1.3687	1.51096	1.24567	-0.28	1.1921	1.51096	1.0797	-0.28	1.41394	1.51096	1.24215	-0.28	1.16242	1.51096	1.00743
2.6	0.155	0.4435		-0.275	1.31103	1.4456	1.18416	-0.275	1.18869	1.4456	1.07289	-0.275	1.42716	1.4456	1.26198	-0.275	1.1495	1.4456	1.00066
2.7	0.2214	0.4435		-0.27	1.29566	1.43022	1.17263	-0.27	1.1955	1.43022	1.08311	-0.27	1.40073	1.43022	1.22894	-0.27	1.1495	1.43022	1.00097
2.8	0.31	0.4878		-0.265	1.27259	1.40715	1.1534	-0.265	1.17166	1.40715	1.05586	-0.265	1.3743	1.40715	1.20912	-0.265	1.12367	1.40715	0.975137
2.9	0.4207	0.3104		-0.26	1.2303	1.36486	1.10727	-0.26	1.14101	1.36486	1.03202	-0.26	1.3743	1.36486	1.20251	-0.26	1.09784	1.36486	0.949306
3	0	0		-0.255	1.19954	1.32641	1.07651	-0.255	1.12398	1.32641	1.01499	-0.255	1.36108	1.32641	1.1893	-0.255	1.07846	1.32641	0.93639
				-0.25	1.20723	1.33795	1.08804	-0.25	1.08651	1.33795	0.97752	-0.25	1.35448	1.33795	1.18269	-0.25	1.07846	1.33795	0.929932
				-0.245	1.21492	1.34179	1.09573	-0.245	1.06608	1.34179	0.96049	-0.245	1.32805	1.34179	1.16287	-0.245	1.09138	1.34179	0.942848
				-0.24	1.188	1.31488	1.06498	-0.24	1.05926	1.31488	0.950272	-0.24	1.33465	1.31488	1.16947	-0.24	1.09138	1.31488	0.942848
				-0.235	1.19185	1.31872	1.07266	-0.235	1.04905	1.31872	0.94346	-0.235	1.32805	1.31872	1.16287	-0.235	1.05909	1.31872	0.923474
				-0.23	1.16109	1.28797	1.04191	-0.23	1.04564	1.28797	0.936649	-0.23	1.26858	1.28797	1.1034	-0.23	1.04617	1.28797	0.904101
				-0.225	1.14956	1.27643	1.02653	-0.225	1.05245	1.27643	0.946866	-0.225	1.22233	1.27643	1.07037	-0.225	1.01388	1.27643	0.871811
				-0.22	1.13802	1.2649	1.02268	-0.22	1.03542	1.2649	0.926431	-0.22	1.20912	1.2649	1.05055	-0.22	1.00097	1.2649	0.865354
				-0.215	1.09189	1.21492	0.976547	-0.215	1.04905	1.21492	0.94346	-0.215	1.14965	1.21492	0.99108	-0.215	1.0268	1.21492	0.878269
				-0.21	1.03806	1.16494	0.925045	-0.21	1.03883	1.16494	0.929837	-0.21	1.12983	1.16494	0.977866	-0.21	1.03972	1.16494	0.897643
				-0.205	1.03422	1.15725	0.922722	-0.205	1.0218	1.15725	0.919071	-0.205	1.07037	1.15725	0.918401	-0.205	1.03326	1.15725	0.891185
				-0.2	1.00346	1.12265	0.891965	-0.2	1.03542	1.12265	0.929837	-0.2	1.06376	1.12265	0.911794	-0.2	1.02034	1.12265	0.878269
				-0.195	1.04191	1.16494	0.934256	-0.195	1.05245	1.16494	0.946866	-0.195	1.03733	1.16494	0.891972	-0.195	0.955764	1.16494	0.820149
				-0.19	1.01884	1.14187	0.911188	-0.19	1.03202	1.14187	0.923025	-0.19	1.06376	1.14187	0.905187	-0.19	1.00097	1.14187	0.858896
				-0.185	1.05344	1.18032	0.941945	-0.185	1.01839	1.18032	0.912807	-0.185	1.02412	1.18032	0.878758	-0.185	0.968679	1.18032	0.826606
				-0.18	1.04191	1.16109	0.934256	-0.18	1.03542	1.16109	0.929837	-0.18	0.977866	1.16109	0.839115	-0.18	0.955764	1.16109	0.813691
				-0.175	1.03037	1.14956	0.915033	-0.175	1.00477	1.14956	0.895777	-0.175	0.977866	1.14956	0.832507	-0.175	0.962222	1.14956	0.820149
				-0.17	1.05729	1.18416	0.94579	-0.17	1.00817	1.18416	0.899183	-0.17	0.99108	1.18416	0.845722	-0.17	0.994511	1.18416	0.858896
				-0.165	1.06882	1.19569	0.957324	-0.165	0.991144	1.19569	0.888965	-0.165	0.977866	1.19569	0.839115	-0.165	1.00743	1.19569	0.865354
				-0.16	1.07651	1.20723	0.965013	-0.16	1.00136	1.20723	0.895777	-0.16	0.964651	1.20723	0.8259	-0.16	1.00743	1.20723	0.865354
				-0.155	1.07651	1.20723	0.961169	-0.155	0.991144	1.20723	0.888965	-0.155	0.958044	1.20723	0.812686	-0.155	0.994511	1.20723	0.852438
				-0.15	1.06113	1.18624	0.94579	-0.15	1.00477	1.18624	0.902589	-0.15	0.971259	1.18624	0.832507	-0.15	1.00097	1.18624	0.858896
				-0.145	1.0496	1.17647	0.938101	-0.145	1.0252	1.17647	0.919619	-0.145	0.997687	1.17647	0.852329	-0.145	0.981595	1.17647	0.839522
				-0.14	1.03806	1.16494	0.926567	-0.14	1.00477	1.16494	0.905458	-0.14	1.0109	1.16494	0.865543	-0.14	0.955764	1.16494	0.820149
				-0.135	1.01499	1.13418	0.899654	-0.135	1.0218	1.13418	0.919619	-0.135	0.984473	1.13418	0.839115	-0.135	0.962222	1.13418	0.826606
				-0.13	0.999616	1.12265	0.88812	-0.13	0.987738	1.12265	0.878747	-0.13	0.984473	1.12265	0.839115	-0.13	0.968679	1.12265	0.826606
				-0.125	1.00346	1.12649	0.890083	-0.125	0.967302	1.12649	0.865123	-0.125	1.0109	1.12649	0.868267	-0.125	1.00097	1.12649	0.858896
				-0.12	0.988082	1.10727	0.876586	-0.12	0.97752	1.10727	0.872189	-0.12	0.971259	1.10727	0.832507	-0.12	0.968679	1.10727	0.826606
				-0.115	1.00346	1.12649	0.891965	-0.115	0.950272	1.12649	0.851499	-0.115	0.977866	1.12649	0.839115	-0.115	0.929932	1.12649	0.794317
				-0.11	1.02653	1.14956	0.915033	-0.11	0.936649	1.14956	0.831063	-0.11	0.977866	1.14956	0.832507	-0.11	0.897643	1.14956	0.762028
				-0.105	1.03422	1.15883	0.922722	-0.105	0.933243	1.15883	0.834469	-0.105	0.964651	1.15883	0.819293	-0.105	0.904101	1.15883	0.768486
				-0.1	1.03422	1.15632	0.918877	-0.1	0.957084	1.15632	0.854905	-0.1	0.931615	1.15632	0.792864	-0.1	0.865354	1.15632	0.729738
				-0.095	1.05344	1.17647	0.938101	-0.095	0.957084	1.17647	0.858311	-0.095	0.898579	1.17647	0.759828	-0.095	0.878269	1.17647	0.742654
				-0.09	1.0842	1.20723	0.968858	-0.09	0.970708	1.20723	0.861717	-0.09	0.865543	1.20723	0.733399	-0.09	0.833064	1.20723	0.703907
				-0.085	1.06882	1.19185	0.953479	-0.085	0.987738	1.19185	0.882153	-0.085	0.872151	1.19185	0.740007	-0.085	0.84598	1.19185	0.716823
				-0.08	1.07266	1.19954	0.961169	-0.08	0.974114	1.19954	0.871935	-0.08	0.865543	1.19954	0.726792	-0.08	0.871811	1.19954	0.749112
				-0.075	1.06113	1.18032	0.94579	-0.075	0.984332	1.18032	0.882153	-0.075	0.852329	1.18032	0.713578	-0.075	0.858896	1.18032	0.723281
				-0.07	1.0496	1.17647	0.938101	-0.07	0.953678	1.17647	0.854905	-0.07	0.839115	1.17647	0.700363	-0.07	0.858896	1.17647	0.723281
				-0.065	1.02268	1.14571	0.907343	-0.065	0.953678	1.14571	0.851499	-0.065	0.819293	1.14571	0.687149	-0.065	0.833064	1.14571	0.703907
				-0.06	1.04575	1.17263	0.930411	-0.06	0.902589	1.17263	0.803815	-0.06	0.845722	1.17263	0.713578	-0.06	0.84598	1.17263	0.716823
				-0.055	1.04575	1.16878	0.930411	-0.055	0.905995	1.16878	0.803417	-0.055	0.858936	1.16878	0.720185	-0.055	0.839522	1.16878	0.703907
				-0.05	1.06498	1.188	0.953479	-0.05	0.919619	1.188	0.817439	-0.05	0.858936	1.188	0.726792	-0.05	0.84598	1.188	0.710365
				-0.045	1.06882	1.18416	0.953479	-0.045	0.912807	1.18416	0.810627	-0.045	0.845722	1.18416	0.713578	-0.045	0.871811	1.18416	0.742654
				-0.04	1.06882	1.19185	0.957324	-0.04	0.946866	1.19185	0.844687	-0.04	0.8259	1.19185	0.687149	-0.04	0.858896	1.19185	0.724741
				-0.035	1.04575	1.17647	0.934256	-0.035	0.902589	1.17647	0.803815	-0.035	0.806079	1.17647	0.673935	-0.035	0.878269	1.17647	0.749112
				-0.03	1.05344	1.17647	0.934256	-0.03	0.936649	1.17647	0.831063	-0.03	0.799471	1.17647	0.667327	-0.03	0.852438	1.17647	0.723281
				-0.025	1.10727	1.22645	0.988082	-0.025	0.940054	1.22645	0.841281	-0.025	0.773043	1.22645	0.647506	-0.025	0.852438	1.22645	0.716823
				-0.02	1.14956	1.28028	1.03422	-0.02	0.950272	1.28028	0.848093	-0.02	0.77965	1.28028	0.654113	-0.02	0.833064	1.28028	0.697449
				-0.015	1.1534	1.27643	1.03422	-0.015	0.950272	1.27643	0.851499	-0.015	0.77965	1.27643	0.654113	-0.015	0.820149	1.27643	0.690991
				-0.01	1.14571	1.2649	1.02653	-0.01	0.963896	1.2649	0.861717	-0.01	0.792864	1.2649	0.667327	-0.01	0.833064	1.2649	0.703907
				-0.005	1.09573	1.21876	0.984237	-0.005	0.933243	1.21876	0.834469	-0.005	0.766435	1.21876	0.634291	-0.005	0.794317	1.21876	0.66516
				0	1.05344	1.17647	0.941945	0	0.909401	1.17647	0.803815	0	0.753221	1.17647	0.634291	0	0.762028	1.17647	0.639328
				0.005	1.0073	1.12649	0.891965	0.005	0.885559	1.12649	0.785448	0.005	0.740007	1.12649	0.61447	0.005	0.729738	1.12649	0.607039
				0.01	0.949635	1.06882	0.841984	0.01	0.827657	1.06882	0.732289	0.01	0.693756	1.06882	0.574827	0.01	0.716823	1.06882	0.600581
				0.015	0.922722	1.04411	0.818916	0.015	0.807221	1.04411	0.711853	0.015	0.667327	1.04411	0.555005	0.015	0.66516	1.04411	0.548918
				0.02	0.876586	0.988082	0.768935	0.02	0.769755	0.988082	0.681199	0.02	0.634291	0.988082	0.521969	0.02	0.652244	0.988082	0.536003
				0.025	0.838139	0.949635	0.734333	0.025	0.739101	0.949635	0.647139	0.025	0.594648	0.949635	0.482326	0.025	0.619955	0.949635	0.503713
				0.03	0.815071	0.926567	0.711265	0.03	0.715259	0.926567	0.626703	0.03	0.548398	0.926567	0.442683	0.03	0.581208	0.926567	0.471424
				0.035	0.77278	0.880431	0.676663	0.035	0.657357	0.880431	0.572207	0.035	0.515362	0.880431	0.416254	0.035	0.561834	0.880431	0.458508
				0.04	0.699731	0.799692	0.603614	0.04	0.643733	0.799692	0.561989	0.04	0.475719	0.799692	0.376611	0.04	0.490798	0.799692	0.39393
				0.045	0.638216	0.738178	0.549789	0.045	0.613079	0.738178	0.527929	0.045	0.403039	0.738178	0.310538	0.045	0.445593	0.738178	0.348725
				0.05	0.59208	0.682248	0.503652	0.05	0.558583	0.682248	0.476839	0.05	0.363396	0.682248	0.277502	0.05	0.413303	0.682248	0.322893
				0.055	0.52672	0.615148	0.440929	0.055	0.497275	0.615148	0.423881	0.055	0.33036	0.615148	0.244466	0.055	0.368098	0.615148	0.284146
				0.06	0.495963	0.588235	0.415225	0.06	0.429155	0.588235	0.361035	0.06	0.303931	0.588235	0.224645	0.06	0.36164	0.588235	0.277688
				0.065	0.457516	0.542099	0.380623	0.065	0.384877	0.542099	0.320163	0.065	0.277502	0.542099	0.198216	0.065	0.316435	0.542099	0.232483
				0.07	0.388312	0.46905	0.319108	0.07	0.326975	0.46905	0.269074	0.07	0.237859	0.46905	0.171787	0.07	0.290604	0.46905	0.213109
				0.075	0.319108	0.392157	0.257593	0.075	0.279292	0.392157	0.224796	0.075	0.198216	0.392157	0.138751	0.075	0.238941	0.392157	0.167904
				0.08	0.288351	0.361399	0.230681	0.08	0.252044	0.361399	0.200954	0.08	0.16518	0.361399	0.105715	0.08	0.232483	0.361399	0.167904
				0.085	0.215302	0.276817	0.165321	0.085	0.217984	0.276817	0.1703	0.085	0.145358	0.276817	0.0925008	0.085	0.18082	0.276817	0.122699
				0.09	0.161476	0.219146	0.119185	0.09	0.160082	0.219146	0.11921	0.09	0.0925008	0.219146	0.0528576	0.09	0.148531	0.219146	0.0968679
				0.095	0.130719	0.176855	0.0922722	0.095	0.126022	0.176855	0.0885559	0.095	0.0792864	0.176855	0.0462504	0.095	0.122699	0.176855	0.0774943
				0.1	0.103806	0.149942	0.0692042	0.1	0.0953678	0.149942	0.0647139	0.1	0.0858936	0.149942	0.0462504	0.1	0.116242	0.149942	0.0710365
				0.105	0.0999616	0.146098	0.0653595	0.105	0.0953678	0.146098	0.0647139	0.105	0.0792864	0.146098	0.0396432	0.105	0.116242	0.146098	0.0710365
				0.11	0.107651	0.153787	0.0730488	0.11	0.108992	0.153787	0.0749319	0.11	0.105715	0.153787	0.066072	0.11	0.116242	0.153787	0.0710365
				0.115	0.11534	0.161476	0.0768935	0.115	0.126022	0.161476	0.0919619	0.115	0.0792864	0.161476	0.0396432	0.115	0.109784	0.161476	0.0645786
				0.12	0.153787	0.207612	0.111496	0.12	0.160082	0.207612	0.11921	0.12	0.0792864	0.207612	0.0462504	0.12	0.109784	0.207612	0.0645786
				0.125	0.199923	0.261438	0.153787	0.125	0.190736	0.261438	0.146458	0.125	0.105715	0.261438	0.0594648	0.125	0.103326	0.261438	0.0581208
				0.13	0.219146	0.284506	0.165321	0.13	0.241826	0.284506	0.190736	0.13	0.112322	0.284506	0.066072	0.13	0.116242	0.284506	0.0710365
				0.135	0.288351	0.357555	0.230681	0.135	0.28951	0.357555	0.235014	0.135	0.138751	0.357555	0.0858936	0.135	0.122699	0.357555	0.0774943
				0.14	0.322953	0.396002	0.261438	0.14	0.337193	0.396002	0.275886	0.14	0.158573	0.396002	0.105715	0.14	0.122699	0.396002	0.0774943
				0.145	0.426759	0.511342	0.35371	0.145	0.398501	0.511342	0.330381	0.145	0.16518	0.511342	0.105715	0.145	0.116242	0.511342	0.0710365
				0.15	0.480584	0.565167	0.403691	0.15	0.432561	0.565167	0.361035	0.15	0.198216	0.565167	0.138751	0.15	0.142073	0.565167	0.0904101
				0.155	0.584391	0.680507	0.495963	0.155	0.514305	0.680507	0.439373	0.155	0.204823	0.680507	0.138751	0.155	0.148531	0.680507	0.0968679
				0.16	0.668973	0.770047	0.580546	0.16	0.585831	0.770047	0.504087	0.16	0.231252	0.770047	0.16518	0.16	0.154989	0.770047	0.103326
				0.165	0.711265	0.815071	0.622837	0.165	0.664169	0.815071	0.575613	0.165	0.244466	0.815071	0.178394	0.165	0.187278	0.815071	0.129157
				0.17	0.795848	0.906915	0.699731	0.17	0.715259	0.906915	0.626703	0.17	0.277502	0.906915	0.204823	0.17	0.200194	0.906915	0.142073
				0.175	0.857363	0.968858	0.749712	0.175	0.779973	0.968858	0.688011	0.175	0.303931	0.968858	0.224645	0.175	0.226025	0.968858	0.161447
				0.18	0.972703	1.09189	0.865052	0.18	0.888965	1.09189	0.790191	0.18	0.33036	1.09189	0.251074	0.18	0.27123	1.09189	0.193736
				0.185	1.06113	1.18416	0.94579	0.185	0.991144	1.18416	0.888965	0.185	0.403039	1.18416	0.310538	0.185	0.297062	1.18416	0.219567
				0.19	1.12649	1.25721	1.01499	0.19	1.06608	1.25721	0.958005	0.19	0.469111	1.25721	0.370003	0.19	0.322893	1.25721	0.245399
				0.195	1.19954	1.32641	1.08035	0.195	1.12057	1.32641	1.00817	0.195	0.515362	1.32641	0.416254	0.195	0.368098	1.32641	0.284146
				0.2	1.27643	1.39946	1.1534	0.2	1.1921	1.39946	1.08311	0.2	0.561612	1.39946	0.455897	0.2	0.406845	1.39946	0.316435
				0.205	1.33795	1.46867	1.21492	0.205	1.28747	1.46867	1.16826	0.205	0.594648	1.46867	0.482326	0.205	0.477882	1.46867	0.381014
				0.21	1.39177	1.53018	1.26105	0.21	1.31471	1.53018	1.19891	0.21	0.634291	1.53018	0.521969	0.21	0.536003	1.53018	0.432677
				0.215	1.39946	1.53018	1.2649	0.215	1.35559	1.53018	1.23298	0.215	0.667327	1.53018	0.548398	0.215	0.594123	1.53018	0.48434
				0.22	1.4456	1.58401	1.31488	0.22	1.37943	1.58401	1.26022	0.22	0.726792	1.58401	0.601255	0.22	0.639328	1.58401	0.529545
				0.225	1.49558	1.63399	1.36101	0.225	1.41008	1.63399	1.29087	0.225	0.733399	1.63399	0.607863	0.225	0.684533	1.63399	0.568292
				0.23	1.51096	1.65321	1.37639	0.23	1.39986	1.65321	1.27725	0.23	0.806079	1.65321	0.673935	0.23	0.716823	1.65321	0.594123
				0.235	1.47251	1.61092	1.33795	0.235	1.39986	1.61092	1.27993	0.235	0.832507	1.61092	0.700363	0.235	0.729738	1.61092	0.607039
				0.24	1.49942	1.63399	1.36101	0.24	1.40668	1.63399	1.28406	0.24	0.858936	1.63399	0.726792	0.24	0.774943	1.63399	0.652244
				0.245	1.44944	1.5917	1.31872	0.245	1.41008	1.5917	1.28406	0.245	0.898579	1.5917	0.766435	0.245	0.807233	1.5917	0.678076
				0.25	1.45713	1.59938	1.32641	0.25	1.42371	1.59938	1.30109	0.25	0.918401	1.59938	0.77965	0.25	0.84598	1.59938	0.716823
				0.255	1.41869	1.56094	1.29181	0.255	1.44074	1.56094	1.32153	0.255	0.94483	1.56094	0.806079	0.255	0.897643	1.56094	0.768486
				0.26	1.38408	1.51865	1.25592	0.26	1.40668	1.51865	1.28406	0.26	0.958044	1.51865	0.812686	0.26	0.955764	1.51865	0.813691
				0.265	1.39562	1.53018	1.2649	0.265	1.37602	1.53018	1.25341	0.265	0.984473	1.53018	0.839115	0.265	0.975137	1.53018	0.826606
				0.27	1.36486	1.50451	1.24183	0.27	1.3658	1.50451	1.24168	0.27	0.977866	1.50451	0.832507	0.27	0.981595	1.50451	0.839522
				0.275	1.34564	1.4802	1.21107	0.275	1.3624	1.4802	1.24659	0.275	0.971259	1.4802	0.832507	0.275	0.955764	1.4802	0.813691
				0.28	1.26874	1.40715	1.14187	0.28	1.3045	1.40715	1.18188	0.28	0.971259	1.40715	0.832507	0.28	0.917016	1.40715	0.774943
				0.285	1.24567	1.38024	1.12117	0.285	1.24319	1.38024	1.12398	0.285	0.925008	1.38024	0.786257	0.285	0.949306	1.38024	0.807233
				0.29	1.20338	1.33026	1.0842	0.29	1.18869	1.33026	1.07289	0.29	0.872151	1.33026	0.726792	0.29	0.975137	1.33026	0.833064
				0.295	1.17263	1.29847	1.0496	0.295	1.14441	1.29847	1.03202	0.295	0.852329	1.29847	0.720185	0.295	1.00097	1.29847	0.852438
				0.3	1.13418	1.26105	1.01499	0.3	1.08992	1.26105	0.984332	0.3	0.812686	1.26105	0.680542	0.3	0.988053	1.26105	0.852438
				0.305	1.09958	1.22645	0.988082	0.305	1.04223	1.22645	0.929837	0.305	0.832507	1.22645	0.693756	0.305	0.955764	1.22645	0.820149
				0.31	1.05729	1.18416	0.949635	0.31	1.00817	1.18416	0.905995	0.31	0.839115	1.18416	0.713578	0.31	0.962222	1.18416	0.820149
				0.315	1.07651	1.20338	0.965013	0.315	0.953678	1.20338	0.851499	0.315	0.832507	1.20338	0.706971	0.315	0.949306	1.20338	0.807233
				0.32	1.02268	1.14187	0.911188	0.32	0.909401	1.14187	0.810627	0.32	0.786257	1.14187	0.66072	0.32	0.955764	1.14187	0.813691
				0.325	0.976547	1.09573	0.865052	0.325	0.885559	1.09573	0.786785	0.325	0.806079	1.09573	0.680542	0.325	0.988053	1.09573	0.84598
				0.33	0.953479	1.07266	0.845829	0.33	0.868529	1.07266	0.773161	0.33	0.759828	1.07266	0.634291	0.33	0.962222	1.07266	0.826606
				0.335	0.980392	1.10342	0.876586	0.335	0.858311	1.10342	0.762943	0.335	0.753221	1.10342	0.627684	0.335	0.942848	1.10342	0.807233
				0.34	0.94579	1.06498	0.838139	0.34	0.820845	1.06498	0.728883	0.34	0.746614	1.06498	0.621077	0.34	0.93639	1.06498	0.794317
				0.345	0.922722	1.03806	0.818916	0.345	0.779973	1.03806	0.684605	0.345	0.733399	1.03806	0.61447	0.345	0.968679	1.03806	0.833064
				0.35	0.915033	1.03037	0.811172	0.35	0.769755	1.03037	0.677793	0.35	0.713578	1.03037	0.588041	0.35	0.929932	1.03037	0.787859
				0.355	0.911188	1.02653	0.803537	0.355	0.732289	1.02653	0.643733	0.355	0.706971	1.02653	0.588041	0.355	0.923474	1.02653	0.781401
				0.36	0.891965	1.01115	0.788158	0.36	0.732289	1.01115	0.640327	0.36	0.700363	1.01115	0.581434	0.36	0.891185	1.01115	0.75557
				0.365	0.865052	0.976547	0.757401	0.365	0.708447	0.976547	0.619891	0.365	0.687149	0.976547	0.568219	0.365	0.852438	0.976547	0.716823
				0.37	0.853518	0.965013	0.745867	0.37	0.708447	0.965013	0.619891	0.37	0.693756	0.965013	0.568219	0.37	0.865354	0.965013	0.729738
				0.375	0.845829	0.957324	0.742022	0.375	0.664169	0.957324	0.579019	0.375	0.700363	0.957324	0.581434	0.375	0.910559	0.957324	0.774943
				0.38	0.849673	0.959492	0.745867	0.38	0.623297	0.959492	0.541553	0.38	0.720185	0.959492	0.594648	0.38	0.929932	0.959492	0.787859
				0.385	0.834295	0.94579	0.734333	0.385	0.616485	0.94579	0.534741	0.385	0.706971	0.94579	0.581434	0.385	0.871811	0.94579	0.742654
				0.39	0.838139	0.94579	0.738178	0.39	0.626703	0.94579	0.541553	0.39	0.713578	0.94579	0.594648	0.39	0.865354	0.94579	0.736196
				0.395	0.807382	0.915033	0.70742	0.395	0.640327	0.915033	0.558583	0.395	0.740007	0.915033	0.621077	0.395	0.852438	0.915033	0.722054
				0.4	0.849673	0.968858	0.749712	0.4	0.674387	0.968858	0.585831	0.4	0.740007	0.968858	0.61447	0.4	0.833064	0.968858	0.697449
				0.405	0.907343	1.02268	0.803537	0.405	0.667575	1.02268	0.579019	0.405	0.726792	1.02268	0.607863	0.405	0.852438	1.02268	0.723281
				0.41	0.891965	1.01115	0.788158	0.41	0.647139	1.01115	0.561989	0.41	0.687149	1.01115	0.568219	0.41	0.807233	1.01115	0.678076
				0.415	0.88812	0.999616	0.780469	0.415	0.647139	0.999616	0.565395	0.415	0.680542	0.999616	0.561612	0.415	0.826606	0.999616	0.697449
				0.42	0.895809	1.01115	0.792003	0.42	0.677793	1.01115	0.589237	0.42	0.667327	1.01115	0.548398	0.42	0.826606	1.01115	0.697449
				0.425	0.907343	1.02268	0.799692	0.425	0.677793	1.02268	0.589237	0.425	0.647506	1.02268	0.528576	0.425	0.813691	1.02268	0.684533
				0.43	0.911188	1.02653	0.803537	0.43	0.684605	1.02653	0.596049	0.43	0.66072	1.02653	0.541791	0.43	0.800775	1.02653	0.671618
				0.435	0.899654	1.01115	0.795848	0.435	0.677793	1.01115	0.592643	0.435	0.607863	1.01115	0.49554	0.435	0.852438	1.01115	0.723281
				0.44	0.899654	1.01884	0.795848	0.44	0.674387	1.01884	0.589237	0.44	0.634291	1.01884	0.521969	0.44	0.884727	1.01884	0.75557
				0.445	0.918877	1.03806	0.811226	0.445	0.681199	1.03806	0.596049	0.445	0.654113	1.03806	0.535183	0.445	0.839522	1.03806	0.710365
				0.45	0.918877	1.03806	0.815071	0.45	0.694823	1.03806	0.606267	0.45	0.654113	1.03806	0.535183	0.45	0.839522	1.03806	0.710365
				0.455	0.922722	1.03806	0.815071	0.455	0.705041	1.03806	0.619891	0.455	0.647506	1.03806	0.535183	0.455	0.807233	1.03806	0.678076
				0.46	0.915033	1.03037	0.803537	0.46	0.691417	1.03037	0.602861	0.46	0.634291	1.03037	0.515362	0.46	0.833064	1.03037	0.697671
				0.465	0.907343	1.02653	0.803537	0.465	0.674387	1.02653	0.585831	0.465	0.640899	1.02653	0.528576	0.465	0.833064	1.02653	0.703907
				0.47	0.922722	1.03806	0.811226	0.47	0.650545	1.03806	0.565395	0.47	0.667327	1.03806	0.548398	0.47	0.833064	1.03806	0.697449
				0.475	0.926567	1.04575	0.818916	0.475	0.653951	1.04575	0.572207	0.475	0.673935	1.04575	0.561612	0.475	0.807233	1.04575	0.678076
				0.48	0.911188	1.01884	0.799692	0.48	0.684605	1.01884	0.592643	0.48	0.687149	1.01884	0.568219	0.48	0.787859	1.01884	0.658702
				0.485	0.911188	1.02653	0.803537	0.485	0.688011	1.02653	0.599455	0.485	0.693756	1.02653	0.574827	0.485	0.826606	1.02653	0.703907
				0.49	0.922722	1.04191	0.815071	0.49	0.688011	1.04191	0.599455	0.49	0.733399	1.04191	0.607863	0.49	0.833064	1.04191	0.703907
				0.495	0.94579	1.06113	0.838139	0.495	0.708447	1.06113	0.616485	0.495	0.733399	1.06113	0.607863	0.495	0.839522	1.06113	0.710365
				0.5	0.926567	1.04191	0.818916	0.5	0.694823	1.04191	0.602861	0.5	0.746614	1.04191	0.621077	0.5	0.839522	1.04191	0.710365
				0.505	0.922722	1.04213	0.815071	0.505	0.718665	1.04213	0.630109	0.505	0.773043	1.04213	0.640899	0.505	0.84598	1.04213	0.716823
				0.51	0.938101	1.05729	0.834295	0.51	0.722071	1.05729	0.633515	0.51	0.759828	1.05729	0.634291	0.51	0.904101	1.05729	0.768486
				0.515	0.953479	1.06882	0.841984	0.515	0.732289	1.06882	0.643733	0.515	0.792864	1.06882	0.667327	0.515	0.904101	1.06882	0.768486
				0.52	0.972703	1.09573	0.861207	0.52	0.735695	1.09573	0.643733	0.52	0.865543	1.09573	0.733399	0.52	0.878269	1.09573	0.749112
				0.525	0.957324	1.07266	0.844571	0.525	0.722071	1.07266	0.636921	0.525	0.872151	1.07266	0.740007	0.525	0.897643	1.07266	0.762028
				0.53	0.953479	1.06882	0.845829	0.53	0.711853	1.06882	0.623297	0.53	0.858936	1.06882	0.733399	0.53	0.891185	1.06882	0.75557
				0.535	0.953479	1.07266	0.845829	0.535	0.725477	1.07266	0.636921	0.535	0.878758	1.07266	0.746614	0.535	0.871811	1.07266	0.742654
				0.54	0.94579	1.06113	0.838139	0.54	0.742507	1.06113	0.650545	0.54	0.852329	1.06113	0.720185	0.54	0.891185	1.06113	0.75557
				0.545	0.938101	1.05729	0.834295	0.545	0.756131	1.05729	0.664169	0.545	0.839115	1.05729	0.706971	0.545	0.904101	1.05729	0.774943
				0.55	0.915033	1.03422	0.807382	0.55	0.745913	1.03422	0.653951	0.55	0.806079	1.03422	0.680542	0.55	0.923474	1.03422	0.787859
				0.555	0.907343	1.02653	0.803537	0.555	0.745913	1.02653	0.657357	0.555	0.77965	1.02653	0.654113	0.555	0.949306	1.02653	0.807233
				0.56	0.911188	1.03422	0.807382	0.56	0.745913	1.03422	0.650545	0.56	0.806079	1.03422	0.673935	0.56	0.962222	1.03422	0.826606
				0.565	0.918877	1.03422	0.811226	0.565	0.756131	1.03422	0.664169	0.565	0.792864	1.03422	0.66072	0.565	0.942848	1.03422	0.807233
				0.57	0.911188	1.02653	0.803492	0.57	0.762943	1.02653	0.670981	0.57	0.746614	1.02653	0.621077	0.57	0.929932	1.02653	0.794317
				0.575	0.903499	1.01884	0.795848	0.575	0.762943	1.01884	0.674387	0.575	0.740007	1.01884	0.621077	0.575	0.923474	1.01884	0.787859
				0.58	0.930411	1.04191	0.82276	0.58	0.742507	1.04191	0.650545	0.58	0.693756	1.04191	0.574827	0.58	0.949306	1.04191	0.813691
				0.585	0.926567	1.04191	0.818916	0.585	0.735695	1.04191	0.647139	0.585	0.693756	1.04191	0.568219	0.585	0.917016	1.04191	0.781401
				0.59	0.922722	1.03806	0.815071	0.59	0.752725	1.03806	0.660763	0.59	0.680542	1.03806	0.561612	0.59	0.891185	1.03806	0.75557
				0.595	0.926567	1.03806	0.815071	0.595	0.725477	1.03806	0.636921	0.595	0.66072	1.03806	0.541791	0.595	0.865354	1.03806	0.736196
				0.6	0.911188	1.03037	0.803537	0.6	0.701635	1.03037	0.616485	0.6	0.640899	1.03037	0.528576	0.6	0.891185	1.03037	0.75557
				0.605	0.907343	1.02268	0.803537	0.605	0.684605	1.02268	0.596049	0.605	0.667327	1.02268	0.548398	0.605	0.871811	1.02268	0.742642
				0.61	0.88812	1.0073	0.784314	0.61	0.694823	1.0073	0.606267	0.61	0.673935	1.0073	0.548398	0.61	0.820149	1.0073	0.690991
				0.615	0.895809	1.0073	0.788158	0.615	0.722071	1.0073	0.633515	0.615	0.640899	1.0073	0.528576	0.615	0.800775	1.0073	0.678076
				0.62	0.865052	0.980392	0.76307	0.62	0.725477	0.980392	0.633515	0.62	0.621077	0.980392	0.502147	0.62	0.800775	0.980392	0.678076
				0.625	0.838139	0.953479	0.738178	0.625	0.684605	0.953479	0.599455	0.625	0.588041	0.953479	0.475719	0.625	0.800775	0.953479	0.671618
				0.63	0.818916	0.930411	0.718954	0.63	0.705041	0.930411	0.616485	0.63	0.61447	0.930411	0.502147	0.63	0.794317	0.930411	0.66516
				0.635	0.803537	0.915033	0.703576	0.635	0.711853	0.915033	0.619891	0.635	0.654113	0.915033	0.541791	0.635	0.820149	0.915033	0.684533
				0.64	0.849673	0.961169	0.749712	0.64	0.715259	0.961169	0.626703	0.64	0.66072	0.961169	0.541791	0.64	0.781401	0.961169	0.658702
				0.645	0.861207	0.976547	0.757401	0.645	0.705041	0.976547	0.616485	0.645	0.680542	0.976547	0.561612	0.645	0.75557	0.976547	0.632871
				0.65	0.88812	0.999616	0.784314	0.65	0.705041	0.999616	0.619891	0.65	0.700363	0.999616	0.574827	0.65	0.736196	0.999616	0.613497
