# Supplementary material for: A Causal Role for the Cortical Frontal Eye Fields in Microsaccade Deployment
Source: PLoS Biol. 2016 Aug 10;14(8):e1002531. doi: 10.1371/journal.pbio.1002531 (PMC4980061; doi:10.1371/journal.pbio.1002531)
Supplement: S7 Data — (XLSX) [file pbio.1002531.s007.xlsx]

## Sheet: Sheet1
Figure S1a						Figure S1b									Figure S1c
	FEF Warm		FEF Cool			FEF warm				FEF cool					Pre-cue period
Trial #	Horizontal eye position (˚)	Vertical eye position (˚)	Horizontal eye position (˚)	Vertical eye position (˚)		Time from cue onset (s)	Horizontal eye position (˚)	mean + standard error	mean - standard error	Time from cue onset (s)	Horizontal eye position (˚)	mean + standard error	mean - standard error		Monkey & Inactivation condition	∆ horizontal eye position (˚)	p-value
1	0.130316	-0.162248	-0.77107	-0.00976305		-0.4	0.0204887	0.0284232	0.0125543	-0.4	-0.634669	-0.619334	-0.650004		GBr	0.2366	1.153e-55
2	-0.256179	0.225871	-1.22612	-0.197362		-0.399	0.0204929	0.028427	0.0125588	-0.399	-0.633896	-0.618566	-0.649226		DZr	0.1512	3.90837e-07
3	0.182934	-0.292788	-1.05562	-0.0848463		-0.398	0.0205005	0.0284345	0.0125666	-0.398	-0.63311	-0.617786	-0.648435		OZr	0.3045	0.000158659
4	0.0814183	0.236377	-0.488861	-0.0577577		-0.397	0.0205129	0.028447	0.0125789	-0.397	-0.632324	-0.617005	-0.647643		DZl	-0.549	0
5	-0.137262	0.127212	-1.04256	-0.447359		-0.396	0.0205298	0.0284642	0.0125955	-0.396	-0.631546	-0.616232	-0.64686		OZl	-0.1594	2.36683e-12
6	-0.0862585	-0.118745	0.128704	0.215136		-0.395	0.0205506	0.0284852	0.0126159	-0.395	-0.630784	-0.615476	-0.646092		DZbi	-0.6298	0
7	0.0165233	-0.222374	-0.474376	-0.0843774		-0.394	0.0205731	0.028508	0.0126382	-0.394	-0.630047	-0.614745	-0.645348		OZbi	0.3079	1.67886e-12
8	-0.0301609	-0.149244	-0.308186	-0.0187058		-0.393	0.0205953	0.0285303	0.0126602	-0.393	-0.629337	-0.614043	-0.644632
9	0.127035	-0.20307	-0.476616	0.131373		-0.392	0.0206142	0.0285494	0.0126791	-0.392	-0.628657	-0.613369	-0.643944
10	0.107167	-0.149497	-0.562261	0.0570113		-0.391	0.0206288	0.0285638	0.0126938	-0.391	-0.628006	-0.612727	-0.643285
11	-0.148673	-0.105263	-0.548596	-0.00332893		-0.39	0.0206378	0.0285726	0.0127031	-0.39	-0.627383	-0.612112	-0.642654
12	0.248428	0.143975	-0.712621	-0.0578721		-0.389	0.0206421	0.0285764	0.0127077	-0.389	-0.626784	-0.611522	-0.642046
13	0.0602858	-0.111878	-0.750771	0.21786		-0.388	0.0206422	0.0285761	0.0127082	-0.388	-0.62621	-0.610957	-0.641463
14	0.195365	-0.185469	-0.447904	-0.0446861		-0.387	0.0206396	0.028573	0.0127061	-0.387	-0.625661	-0.610418	-0.640905
15	0.240421	0.048525	-0.661968	-0.195158		-0.386	0.020636	0.0285691	0.0127029	-0.386	-0.625142	-0.609908	-0.640376
16	-0.0734765	-0.312213	-1.27034	-0.645606		-0.385	0.0206334	0.0285661	0.0127007	-0.385	-0.624654	-0.60943	-0.639879
17	0.17412	0.0206508	-0.287581	0.16765		-0.384	0.0206331	0.0285654	0.0127008	-0.384	-0.624207	-0.608992	-0.639423
18	0.123115	-0.144354	-0.597637	-0.121239		-0.383	0.0206379	0.0285697	0.012706	-0.383	-0.6238	-0.608594	-0.639006
19	-0.13834	-0.234102	-0.595256	0.518931		-0.382	0.0206492	0.0285804	0.012718	-0.382	-0.62344	-0.608242	-0.638637
20	0.233839	-0.163535	-0.845413	-0.135405		-0.381	0.0206695	0.0285998	0.0127392	-0.381	-0.623123	-0.607933	-0.638312
21	0.0573067	-0.371425	-0.321169	0.327053		-0.38	0.0207014	0.0286305	0.0127724	-0.38	-0.622845	-0.607663	-0.638027
22	-0.0283795	0.0705136	0.0066535	0.363996		-0.379	0.020747	0.0286744	0.0128197	-0.379	-0.622604	-0.60743	-0.637779
23	0.0557042	-0.0669302	-0.535616	0.54221		-0.378	0.0208083	0.0287334	0.0128832	-0.378	-0.622386	-0.607218	-0.637555
24	-0.104562	-0.396451	-0.621144	0.274983		-0.377	0.0208861	0.0288084	0.0129638	-0.377	-0.622182	-0.60702	-0.637345
25	-0.119741	-0.186318	-1.199	0.0718285		-0.376	0.0209814	0.0289005	0.0130624	-0.376	-0.621982	-0.606824	-0.63714
26	-0.0906823	-0.00262348	-0.565385	0.337014		-0.375	0.0210935	0.0290087	0.0131784	-0.375	-0.621773	-0.60662	-0.636926
27	0.242323	0.37125	-0.454621	0.152559		-0.374	0.0212202	0.029131	0.0133093	-0.374	-0.621548	-0.606398	-0.636698
28	-0.0673838	-0.042707	-0.57754	0.832378		-0.373	0.0213576	0.0292638	0.0134515	-0.373	-0.621297	-0.606151	-0.636444
29	0.00160514	0.227028	-0.44036	0.488781		-0.372	0.0215004	0.0294016	0.0135992	-0.372	-0.621018	-0.605874	-0.636162
30	0.130294	0.0947053	-0.157719	0.163433		-0.371	0.0216413	0.0295372	0.0137453	-0.371	-0.620704	-0.605562	-0.635846
31	-0.178007	0.233196	-0.363974	0.138052		-0.37	0.0217725	0.0296631	0.0138818	-0.37	-0.620353	-0.605213	-0.635494
32	-0.137611	-0.0765558	-0.577992	0.322648		-0.369	0.0218859	0.0297712	0.0140005	-0.369	-0.619961	-0.604822	-0.6351
33	-0.137667	-0.115516	-0.404127	0.466789		-0.368	0.0219739	0.029854	0.0140938	-0.368	-0.619528	-0.60439	-0.634666
34	-0.17883	0.155818	0.141539	0.48106		-0.367	0.0220308	0.0299058	0.0141558	-0.367	-0.619053	-0.603916	-0.63419
35	0.184	-0.0420284	-0.205648	0.349231		-0.366	0.0220529	0.0299229	0.0141829	-0.366	-0.618537	-0.603401	-0.633673
36	-0.225987	0.210697	-0.981834	0.468815		-0.365	0.0220389	0.029904	0.0141738	-0.365	-0.617984	-0.60285	-0.633119
37	0.498754	0.46644	-0.113387	0.0388222		-0.364	0.0219903	0.0298507	0.0141299	-0.364	-0.617398	-0.602265	-0.63253
38	-0.295626	0.254186	-0.363417	0.526501		-0.363	0.0219092	0.0297651	0.0140533	-0.363	-0.616784	-0.601654	-0.631914
39	-0.325228	-0.400712	-0.267614	0.457878		-0.362	0.0217989	0.0296504	0.0139474	-0.362	-0.616155	-0.601028	-0.631282
40	-0.202938	-0.0285404	-0.644903	0.209922		-0.361	0.0216631	0.0295103	0.0138158	-0.361	-0.615518	-0.600393	-0.630642
41	-0.413157	-0.538286	0.0486468	0.429473		-0.36	0.0215059	0.0293491	0.0136627	-0.36	-0.614884	-0.599762	-0.630005
42	-0.376795	-0.263002	-0.463395	0.432487		-0.359	0.0213328	0.0291721	0.0134935	-0.359	-0.614263	-0.599144	-0.629381
43	0.0931474	0.112989	-0.185356	0.384714		-0.358	0.021149	0.0289846	0.0133135	-0.358	-0.613664	-0.598547	-0.628781
44	-0.304114	-0.225331	-0.19799	0.861628		-0.357	0.0209615	0.0287934	0.0131296	-0.357	-0.613095	-0.59798	-0.62821
45	-0.145933	-0.0211081	-1.78864	-0.847329		-0.356	0.0207764	0.0286049	0.012948	-0.356	-0.612558	-0.597444	-0.627672
46	-0.447899	-0.269307	-1.15927	-1.3737		-0.355	0.0206001	0.0284253	0.012775	-0.355	-0.612056	-0.596941	-0.62717
47	-0.0686739	0.356528	-0.617605	0.264721		-0.354	0.0204381	0.0282602	0.012616	-0.354	-0.61158	-0.596464	-0.626696
48	-0.261217	-0.171221	-0.997839	0.592101		-0.353	0.0202953	0.0281145	0.0124761	-0.353	-0.611124	-0.596006	-0.626241
49	-0.165096	-0.0262421	-0.420759	0.771614		-0.352	0.0201754	0.027992	0.0123589	-0.352	-0.610679	-0.595559	-0.6258
50	-0.166329	-0.0653194	0.0119278	1.01339		-0.351	0.0200812	0.0278953	0.012267	-0.351	-0.610234	-0.59511	-0.625358
51	-0.315742	0.0106034	0.362119	0.736098		-0.35	0.0200134	0.0278254	0.0122014	-0.35	-0.609782	-0.594654	-0.624909
52	-0.426823	0.0780527	-0.454673	0.380614		-0.349	0.0199711	0.027781	0.0121612	-0.349	-0.609317	-0.594187	-0.624447
53	-0.0866849	-0.275151	0.0734386	0.27694		-0.348	0.0199511	0.0277591	0.0121432	-0.348	-0.60883	-0.593697	-0.623963
54	-0.440274	-0.454735	-0.203352	0.612731		-0.347	0.0199483	0.0277543	0.0121423	-0.347	-0.608321	-0.593186	-0.623456
55	-0.514575	-0.285987	-1.71709	-0.397764		-0.346	0.0199559	0.0277599	0.0121519	-0.346	-0.60779	-0.592654	-0.622926
56	-0.613362	-0.421007	-0.515694	0.302412		-0.345	0.019966	0.027768	0.012164	-0.345	-0.607237	-0.592101	-0.622373
57	-0.387488	-0.300996	-0.476589	0.281822		-0.344	0.0199711	0.027771	0.0121712	-0.344	-0.606664	-0.59153	-0.621799
58	0.424564	0.0802037	-0.423428	0.800092		-0.343	0.0199643	0.027762	0.0121666	-0.343	-0.606077	-0.590945	-0.621209
59	-0.28319	0.232207	-0.938845	-0.309599		-0.342	0.0199414	0.0277368	0.0121459	-0.342	-0.605482	-0.590354	-0.62061
60	-0.32911	-0.283543	-0.677156	-0.0913822		-0.341	0.0199003	0.0276935	0.0121071	-0.341	-0.60488	-0.589757	-0.620004
61	0.00280105	-0.211742	-0.696824	-0.240939		-0.34	0.0198421	0.027633	0.0120512	-0.34	-0.604285	-0.589167	-0.619402
62	0.211589	0.630035	-0.288204	-0.342043		-0.339	0.0197709	0.0275596	0.0119821	-0.339	-0.603699	-0.588588	-0.61881
63	0.0308717	0.65391	-0.397197	-0.456102		-0.338	0.0196911	0.0274778	0.0119043	-0.338	-0.60313	-0.588027	-0.618233
64	0.20648	0.551781	-0.675305	-0.436192		-0.337	0.019609	0.027394	0.011824	-0.337	-0.602584	-0.587489	-0.617679
65	0.328583	0.298292	-0.417727	-0.0984179		-0.336	0.0195291	0.0273127	0.0117455	-0.336	-0.602064	-0.586979	-0.61715
66	0.12807	0.54787	-0.523891	-0.133016		-0.335	0.0194558	0.0272384	0.0116731	-0.335	-0.601572	-0.586496	-0.616648
67	0.24959	0.401807	-0.665992	-0.0715121		-0.334	0.0193907	0.0271728	0.0116086	-0.334	-0.601111	-0.586045	-0.616178
68	-0.364949	0.221976	-0.768971	-0.131076		-0.333	0.0193346	0.0271165	0.0115526	-0.333	-0.600673	-0.585617	-0.61573
69	0.105539	0.377396	-0.146497	0.588615		-0.332	0.0192867	0.0270689	0.0115046	-0.332	-0.600257	-0.58521	-0.615303
70	-0.126342	0.0779131	-0.29618	-0.766376		-0.331	0.0192442	0.0270268	0.0114616	-0.331	-0.599856	-0.584819	-0.614894
71	0.0417148	0.56447	-1.15675	0.015252		-0.33	0.0192039	0.0269871	0.0114207	-0.33	-0.599469	-0.584441	-0.614497
72	0.587497	0.727512	-0.551401	-0.054273		-0.329	0.019163	0.0269469	0.0113791	-0.329	-0.599087	-0.584067	-0.614106
73	0.0861829	0.713659	-2.13187	-0.00393194		-0.328	0.019119	0.0269035	0.0113346	-0.328	-0.598701	-0.583689	-0.613712
74	-0.263417	0.747995	-0.479157	0.0999541		-0.327	0.0190711	0.026856	0.0112862	-0.327	-0.59831	-0.583306	-0.613314
75	0.424922	0.309395	-0.549053	0.198161		-0.326	0.01902	0.0268052	0.0112349	-0.326	-0.597907	-0.582909	-0.612905
76	-0.0796644	0.753961	-0.0967918	0.156192		-0.325	0.0189674	0.0267525	0.0111823	-0.325	-0.597491	-0.582498	-0.612483
77	-0.058877	0.032923	-0.476629	0.216572		-0.324	0.0189162	0.0267008	0.0111315	-0.324	-0.597061	-0.582073	-0.612048
78	0.261768	0.497904	-1.3577	1.20608		-0.323	0.0188685	0.0266523	0.0110847	-0.323	-0.59662	-0.581636	-0.611604
79	-0.173013	0.69741	-0.103532	0.290559		-0.322	0.0188272	0.0266096	0.0110447	-0.322	-0.596177	-0.581195	-0.611158
80	0.189288	0.705541	-0.0314496	0.395101		-0.321	0.0187937	0.0265744	0.011013	-0.321	-0.595733	-0.580754	-0.610713
81	-0.397602	0.77988	-0.659779	0.350887		-0.32	0.0187696	0.0265481	0.0109912	-0.32	-0.595297	-0.580318	-0.610275
82	0.637337	0.751121	-0.625501	0.393501		-0.319	0.0187552	0.0265311	0.0109793	-0.319	-0.59487	-0.579892	-0.609848
83	-0.0216875	0.503355	-0.822149	0.496072		-0.318	0.0187505	0.0265235	0.0109775	-0.318	-0.594454	-0.579476	-0.609432
84	-0.0559986	0.34024	-0.192005	0.270222		-0.317	0.0187543	0.0265243	0.0109843	-0.317	-0.594049	-0.579071	-0.609027
85	0.0740953	0.590071	-0.501636	0.483888		-0.316	0.0187644	0.0265313	0.0109975	-0.316	-0.593651	-0.578673	-0.60863
86	0.398097	0.486801	-0.271631	0.264992		-0.315	0.0187787	0.0265426	0.0110149	-0.315	-0.593264	-0.578285	-0.608243
87	0.374811	0.461592	-1.74705	-0.574517		-0.314	0.0187955	0.0265564	0.0110346	-0.314	-0.592884	-0.577905	-0.607862
88	0.147071	0.650372	0.236081	0.579828		-0.313	0.0188131	0.0265712	0.011055	-0.313	-0.592514	-0.577536	-0.607493
89	0.0651199	-0.0668434	-0.263009	1.07239		-0.312	0.0188309	0.0265864	0.0110754	-0.312	-0.592158	-0.577181	-0.607136
90	-0.0331941	0.3455	-0.349524	1.03328		-0.311	0.0188478	0.026601	0.0110947	-0.311	-0.591818	-0.576843	-0.606794
91	-0.00950373	0.806329	-0.937733	-0.587793		-0.31	0.018864	0.026615	0.0111129	-0.31	-0.591496	-0.576523	-0.60647
92	0.0961495	0.479158	-2.12524	0.2191		-0.309	0.0188789	0.0266281	0.0111296	-0.309	-0.591194	-0.576223	-0.606164
93	0.0277227	0.458454	-0.394385	0.278289		-0.308	0.0188929	0.0266405	0.0111454	-0.308	-0.590907	-0.575939	-0.605874
94	0.178729	0.338525	-0.981581	-0.297946		-0.307	0.0189058	0.0266519	0.0111597	-0.307	-0.590635	-0.575671	-0.605599
95	0.176501	0.336784	-0.0128539	0.447508		-0.306	0.0189169	0.0266617	0.011172	-0.306	-0.590369	-0.57541	-0.605329
96	0.191545	0.260185	-0.428923	0.832263		-0.305	0.0189252	0.0266689	0.0111815	-0.305	-0.590107	-0.575152	-0.605061
97	-0.117622	-0.126918	-1.60359	-1.61568		-0.304	0.0189302	0.0266729	0.0111875	-0.304	-0.589835	-0.574887	-0.604784
98	0.00420775	0.107252	-0.0736996	0.529583		-0.303	0.0189317	0.0266735	0.0111898	-0.303	-0.589551	-0.574608	-0.604493
99	0.300142	0.285924	-0.440493	0.645831		-0.302	0.0189309	0.026672	0.0111898	-0.302	-0.589242	-0.574306	-0.604179
100	0.025653	0.733607	-0.63021	0.292399		-0.301	0.0189293	0.0266699	0.0111887	-0.301	-0.588903	-0.573972	-0.603833
101	-0.0343614	0.923247	-0.552677	0.665988		-0.3	0.0189298	0.02667	0.0111896	-0.3	-0.588531	-0.573606	-0.603456
102	0.0988813	0.531491	-1.50121	-0.923548		-0.299	0.0189346	0.0266746	0.0111945	-0.299	-0.588122	-0.573203	-0.603041
103	0.162816	0.807289	0.202424	0.726734		-0.298	0.0189458	0.0266857	0.0112058	-0.298	-0.587677	-0.572764	-0.602591
104	0.378562	0.523198	-1.34351	-0.285053		-0.297	0.0189649	0.0267049	0.0112249	-0.297	-0.587201	-0.572293	-0.602109
105	0.211927	0.215851	-1.93582	-0.759181		-0.296	0.0189927	0.0267328	0.0112526	-0.296	-0.5867	-0.571797	-0.601603
106	0.417868	0.4962	-1.95807	-1.2307		-0.295	0.0190301	0.0267702	0.01129	-0.295	-0.586177	-0.571279	-0.601075
107	0.0789156	0.441082	-0.749934	0.376936		-0.294	0.0190775	0.0268175	0.0113375	-0.294	-0.585646	-0.570752	-0.60054
108	-0.65606	1.95186	-0.449253	-0.0342759		-0.293	0.0191352	0.0268749	0.0113955	-0.293	-0.585111	-0.570222	-0.600001
109	0.127901	0.0386279	-0.356167	0.106038		-0.292	0.0192027	0.0269419	0.0114635	-0.292	-0.584581	-0.569697	-0.599466
110	-0.0874774	0.0515599	-0.263417	0.0255761		-0.291	0.0192786	0.0270171	0.0115401	-0.291	-0.584061	-0.56918	-0.598941
111	0.143637	0.156493	-0.4487	0.0361549		-0.29	0.0193601	0.0270977	0.0116225	-0.29	-0.583557	-0.568681	-0.598432
112	-0.0273971	-0.14285	-0.865875	0.479228		-0.289	0.0194432	0.0271798	0.0117066	-0.289	-0.583076	-0.568205	-0.597946
113	0.0440866	-0.219532	-0.810334	0.326223		-0.288	0.0195228	0.0272583	0.0117873	-0.288	-0.582618	-0.567752	-0.597484
114	0.118912	-0.120376	-0.323918	0.126547		-0.287	0.0195943	0.0273286	0.0118599	-0.287	-0.582192	-0.567331	-0.597053
115	0.0892723	-0.273115	-0.320596	0.414505		-0.286	0.0196531	0.0273864	0.0119198	-0.286	-0.581799	-0.566943	-0.596654
116	-0.107314	0.0737277	-1.05332	-0.309097		-0.285	0.0196955	0.0274278	0.0119632	-0.285	-0.58144	-0.56659	-0.59629
117	-0.0193772	-0.0297607	-0.680408	0.193852		-0.284	0.0197191	0.0274505	0.0119877	-0.284	-0.581115	-0.566271	-0.595959
118	-0.0495317	-0.365966	-0.534814	0.339492		-0.283	0.0197228	0.0274534	0.0119922	-0.283	-0.58082	-0.565981	-0.595658
119	-0.00431622	0.0321385	-0.347154	0.0316556		-0.282	0.0197071	0.0274368	0.0119773	-0.282	-0.580552	-0.56572	-0.595385
120	-0.0699479	-0.351333	-1.05129	0.368244		-0.281	0.0196742	0.0274031	0.0119453	-0.281	-0.580305	-0.565478	-0.595131
121	0.127507	-0.097624	-1.65663	-0.349005		-0.28	0.0196272	0.0273551	0.0118993	-0.28	-0.580072	-0.565251	-0.594893
122	0.162696	-0.0342378	-0.941373	0.344673		-0.279	0.01957	0.0272967	0.0118433	-0.279	-0.579844	-0.565028	-0.59466
123	-0.154112	0.00416788	-0.718364	0.791208		-0.278	0.0195063	0.0272316	0.011781	-0.278	-0.579613	-0.564802	-0.594423
124	0.13685	-0.152766	-0.714219	-0.0655155		-0.277	0.0194404	0.027164	0.0117169	-0.277	-0.579371	-0.564565	-0.594176
125	0.141008	-0.0899648	-0.993561	-0.247529		-0.276	0.0193757	0.0270973	0.0116541	-0.276	-0.579107	-0.564305	-0.593908
126	0.270091	0.0319962	-1.55858	0.355924		-0.275	0.0193151	0.0270345	0.0115958	-0.275	-0.578812	-0.564015	-0.593609
127	-0.381627	-0.0775941	-0.924815	-0.283501		-0.274	0.0192613	0.0269782	0.0115444	-0.274	-0.578482	-0.563689	-0.593274
128	-0.151729	-0.0314715	-0.61859	0.0575087		-0.273	0.0192147	0.026929	0.0115003	-0.273	-0.578115	-0.563326	-0.592903
129	0.152208	-0.220492	-0.729259	0.647044		-0.272	0.0191756	0.0268874	0.0114638	-0.272	-0.577712	-0.562927	-0.592497
130	-0.18087	-0.455438	-0.946771	-0.0219954		-0.271	0.0191434	0.0268527	0.0114341	-0.271	-0.57728	-0.562498	-0.592062
131	-0.292558	-0.10988	-0.287974	0.229925		-0.27	0.0191172	0.0268241	0.0114103	-0.27	-0.576824	-0.562045	-0.591603
132	-0.0748901	-0.463316	-1.70927	0.85755		-0.269	0.0190962	0.0268008	0.0113915	-0.269	-0.576356	-0.561579	-0.591132
133	-0.448829	-0.00609341	-1.85989	-1.49964		-0.268	0.0190795	0.026782	0.0113771	-0.268	-0.575883	-0.561109	-0.590657
134	-0.0504487	-0.0641523	-0.819851	-0.00837964		-0.267	0.0190656	0.026766	0.0113651	-0.267	-0.575414	-0.560643	-0.590186
135	0.0496416	0.225094	-1.66887	-0.256549		-0.266	0.0190534	0.0267521	0.0113547	-0.266	-0.574955	-0.560186	-0.589725
136	-0.222946	-0.0136316	-1.60927	0.21359		-0.265	0.0190419	0.0267389	0.0113448	-0.265	-0.574508	-0.55974	-0.589275
137	-0.00638481	0.118957	-0.122538	-0.0219823		-0.264	0.0190298	0.0267255	0.011334	-0.264	-0.574075	-0.559309	-0.588842
138	-0.146874	0.0551202	-0.209553	-0.0865009		-0.263	0.0190165	0.0267111	0.0113218	-0.263	-0.573656	-0.558892	-0.58842
139	-0.177486	0.198859	-0.580741	-0.171367		-0.262	0.0190022	0.0266961	0.0113083	-0.262	-0.573249	-0.558486	-0.588011
140	-0.168796	0.0297936	-0.809201	0.438357		-0.261	0.0189876	0.026681	0.0112942	-0.261	-0.572856	-0.558096	-0.587617
141	-0.0836734	0.107948	-0.454234	0.151456		-0.26	0.0189737	0.0266669	0.0112805	-0.26	-0.572475	-0.557717	-0.587232
142	-0.217237	0.135883	-1.20678	-0.431692		-0.259	0.0189619	0.0266552	0.0112686	-0.259	-0.572107	-0.557353	-0.586862
143	-0.178901	0.25626	-1.3763	-0.0204176		-0.258	0.0189535	0.0266472	0.0112599	-0.258	-0.57175	-0.556999	-0.586501
144	-0.247293	0.310409	-0.507122	0.191291		-0.257	0.0189493	0.0266435	0.011255	-0.257	-0.571404	-0.556657	-0.58615
145	-0.0241257	0.0203824	-0.750508	-0.0142911		-0.256	0.0189501	0.0266451	0.0112551	-0.256	-0.571069	-0.556327	-0.585811
146	-0.159754	0.196968	-1.0602	-0.530769		-0.255	0.018956	0.0266519	0.0112601	-0.255	-0.570744	-0.556008	-0.585481
147	-0.225751	0.182882	-0.406409	-0.0219198		-0.254	0.0189667	0.0266636	0.0112698	-0.254	-0.57043	-0.555699	-0.585161
148	-0.097136	0.0571555	-0.559101	0.0979627		-0.253	0.0189808	0.0266787	0.011283	-0.253	-0.570122	-0.555397	-0.584847
149	-0.118616	0.252314	-1.12945	0.467461		-0.252	0.0189967	0.0266955	0.011298	-0.252	-0.569819	-0.5551	-0.584538
150	-0.3639	-0.268815	-0.822132	0.172351		-0.251	0.0190131	0.0267126	0.0113136	-0.251	-0.569517	-0.554805	-0.58423
151	-0.357136	-0.387851	-1.16429	0.270129		-0.25	0.0190293	0.0267295	0.0113291	-0.25	-0.569214	-0.554507	-0.583921
152	-0.121593	-0.130105	-0.513738	0.0798864		-0.249	0.0190459	0.0267466	0.0113451	-0.249	-0.568902	-0.554201	-0.583602
153	-0.315858	-0.0606064	-0.754633	0.0432008		-0.248	0.0190637	0.026765	0.0113624	-0.248	-0.568581	-0.553886	-0.583276
154	-0.301581	-0.103291	-1.42734	-0.24021		-0.247	0.0190846	0.0267864	0.0113828	-0.247	-0.568247	-0.553558	-0.582937
155	-0.294173	-0.27836	-0.648993	0.109398		-0.246	0.0191101	0.0268125	0.0114077	-0.246	-0.567904	-0.55322	-0.582587
156	-0.458965	-0.177418	-0.821478	0.170706		-0.245	0.0191412	0.0268443	0.0114382	-0.245	-0.567547	-0.552869	-0.582226
157	-0.296064	-0.151151	-0.901827	0.385025		-0.244	0.0191781	0.0268818	0.0114743	-0.244	-0.567183	-0.552509	-0.581856
158	-0.184688	-0.295813	-1.68656	-0.459072		-0.243	0.0192204	0.0269249	0.0115158	-0.243	-0.566815	-0.552146	-0.581483
159	-0.186843	-0.121258	-0.615451	0.388092		-0.242	0.0192665	0.0269719	0.0115611	-0.242	-0.566447	-0.551784	-0.581111
160	-0.264145	-0.151424	-0.93375	-1.19333		-0.241	0.0193153	0.0270215	0.011609	-0.241	-0.566084	-0.551426	-0.580742
161	-0.365958	-0.242007	-1.08754	-0.331991		-0.24	0.0193651	0.0270722	0.0116579	-0.24	-0.565729	-0.551076	-0.580381
162	-0.39727	-0.434708	-0.458257	0.224588		-0.239	0.019415	0.027123	0.011707	-0.239	-0.565384	-0.550737	-0.58003
163	-0.225874	-0.0682805	-0.519368	0.600232		-0.238	0.0194648	0.0271735	0.0117562	-0.238	-0.565049	-0.550409	-0.579689
164	-0.357409	0.148171	-0.510745	0.259576		-0.237	0.0195143	0.0272235	0.0118051	-0.237	-0.564721	-0.550087	-0.579354
165	-0.472576	0.01465	-0.0771238	0.175306		-0.236	0.0195635	0.0272729	0.0118541	-0.236	-0.564401	-0.549775	-0.579027
166	-0.402152	-0.206932	-0.368719	-0.0600614		-0.235	0.019612	0.0273213	0.0119027	-0.235	-0.564084	-0.549465	-0.578703
167	-0.411892	-0.120684	0.0673203	-0.0673588		-0.234	0.0196591	0.0273679	0.0119503	-0.234	-0.563774	-0.549163	-0.578386
168	-0.0706782	-0.143524	-0.803368	0.54814		-0.233	0.0197034	0.0274113	0.0119954	-0.233	-0.563466	-0.548862	-0.57807
169	-0.280256	-0.356164	0.115008	0.347924		-0.232	0.0197431	0.0274499	0.0120363	-0.232	-0.563159	-0.548562	-0.577756
170	-0.441998	-0.291757	-0.201298	-0.124488		-0.231	0.0197763	0.0274817	0.0120709	-0.231	-0.562855	-0.548265	-0.577445
171	-0.444905	-0.144962	-0.343814	0.0421569		-0.23	0.0198004	0.0275042	0.0120967	-0.23	-0.562552	-0.547968	-0.577136
172	-0.423159	-0.404969	-0.371707	0.379624		-0.229	0.0198134	0.0275155	0.0121114	-0.229	-0.562253	-0.547674	-0.576831
173	-0.10098	0.0427029	-0.201716	0.5836		-0.228	0.0198136	0.027514	0.0121133	-0.228	-0.561955	-0.547381	-0.576529
174	-0.0876958	0.588631	-0.232419	0.413452		-0.227	0.0197991	0.0274977	0.0121005	-0.227	-0.56166	-0.54709	-0.576231
175	0.115916	0.611142	-0.381794	0.547291		-0.226	0.0197697	0.0274667	0.0120728	-0.226	-0.561364	-0.546797	-0.575932
176	-0.0289288	0.488147	-0.720183	0.418389		-0.225	0.0197273	0.0274227	0.0120318	-0.225	-0.561064	-0.546499	-0.575629
177	0.308466	0.21852	-0.198137	-0.111708		-0.224	0.0196741	0.0273682	0.0119801	-0.224	-0.56076	-0.546197	-0.575322
178	0.125875	0.484683	-0.348538	-0.242984		-0.223	0.019615	0.0273078	0.0119221	-0.223	-0.560446	-0.545886	-0.575006
179	0.230177	0.101862	0.0253723	0.119833		-0.222	0.0195544	0.0272463	0.0118626	-0.222	-0.560119	-0.545561	-0.574676
180	0.0323615	0.443972	-0.654109	-0.440578		-0.221	0.019497	0.0271881	0.0118059	-0.221	-0.559777	-0.545222	-0.574332
181	0.166804	0.38972	-0.868335	-0.0506425		-0.22	0.0194462	0.0271367	0.0117557	-0.22	-0.559418	-0.544865	-0.57397
182	0.391643	0.415546	-0.86713	0.782974		-0.219	0.0194046	0.0270946	0.0117145	-0.219	-0.559043	-0.544493	-0.573592
183	0.0581194	0.403658	-0.655791	-0.0281435		-0.218	0.0193738	0.0270635	0.011684	-0.218	-0.55865	-0.544103	-0.573197
184	-0.14058	0.314325	-0.308958	-0.824832		-0.217	0.0193538	0.0270433	0.0116642	-0.217	-0.558241	-0.543697	-0.572785
185	0.443323	0.704555	-0.304258	0.442933		-0.216	0.0193445	0.0270339	0.011655	-0.216	-0.557816	-0.543275	-0.572358
186	0.00570959	0.309804	-1.30489	1.13907		-0.215	0.0193448	0.0270341	0.0116554	-0.215	-0.557373	-0.542835	-0.571911
187	0.130669	0.806182	-0.162005	-0.157693		-0.214	0.0193538	0.027043	0.0116645	-0.214	-0.556911	-0.542376	-0.571447
188	-0.0348917	0.892133	-1.0871	0.842346		-0.213	0.0193709	0.0270601	0.0116816	-0.213	-0.556428	-0.541896	-0.570961
189	-0.0821998	0.26383	-0.962221	0.536683		-0.212	0.0193958	0.0270851	0.0117064	-0.212	-0.555923	-0.541394	-0.570453
190	0.349436	0.493699	-1.1071	0.826284		-0.211	0.0194287	0.0271182	0.0117393	-0.211	-0.555395	-0.540868	-0.569922
191	0.31431	0.466748	-0.114287	-0.0167973		-0.21	0.0194715	0.0271612	0.0117818	-0.21	-0.554847	-0.540323	-0.569372
192	-0.155687	0.554517	-1.40481	-0.395189		-0.209	0.0195262	0.0272163	0.0118361	-0.209	-0.554284	-0.539761	-0.568807
193	0.170909	0.668351	-0.514045	0.189145		-0.208	0.019595	0.0272855	0.0119045	-0.208	-0.553711	-0.53919	-0.568232
194	0.191843	0.465403	-2.08044	0.127943		-0.207	0.0196808	0.0273719	0.0119898	-0.207	-0.553139	-0.53862	-0.567658
195	-0.0214261	0.171718	-1.1502	0.950892		-0.206	0.0197853	0.027477	0.0120936	-0.206	-0.552575	-0.538057	-0.567093
196	0.136743	0.24308	-1.34264	-0.269182		-0.205	0.0199103	0.0276027	0.0122179	-0.205	-0.552029	-0.537511	-0.566546
197	0.107494	0.388377	-1.48729	-0.546721		-0.204	0.0200553	0.0277484	0.0123623	-0.204	-0.551508	-0.536991	-0.566024
198	0.149287	0.5252	-1.0989	0.630696		-0.203	0.0202186	0.0279123	0.0125248	-0.203	-0.551017	-0.5365	-0.565534
199	0.472332	0.639314	-1.21879	-0.258462		-0.202	0.0203954	0.0280898	0.012701	-0.202	-0.550561	-0.536044	-0.565078
200	0.266033	0.327556	-1.42319	0.540293		-0.201	0.0205791	0.0282741	0.0128841	-0.201	-0.550133	-0.535615	-0.564651
201	0.351095	0.567464	-0.380036	0.466961		-0.2	0.0207621	0.0284576	0.0130666	-0.2	-0.549735	-0.535216	-0.564253
202	0.164602	0.419421	-0.198077	0.855951		-0.199	0.0209364	0.0286322	0.0132406	-0.199	-0.549357	-0.534838	-0.563877
203	0.320819	0.406681	-1.15655	0.404264		-0.198	0.0210954	0.0287916	0.0133993	-0.198	-0.548996	-0.534475	-0.563516
204	0.336697	0.268365	-0.293844	0.389638		-0.197	0.0212342	0.0289306	0.0135379	-0.197	-0.548643	-0.534122	-0.563164
205	-0.00502929	-0.781554	0.865874	0.0721396		-0.196	0.0213494	0.029046	0.0136529	-0.196	-0.548294	-0.533772	-0.562815
206	0.876448	0.768058	0.100301	-0.000252569		-0.195	0.0214401	0.0291369	0.0137432	-0.195	-0.547941	-0.533419	-0.562462
207	0.250838	0.73122	-0.60801	0.860687		-0.194	0.0215064	0.0292036	0.0138091	-0.194	-0.54758	-0.533059	-0.562101
208	0.129688	0.45535	-0.978779	-0.200676		-0.193	0.0215507	0.0292484	0.013853	-0.193	-0.547212	-0.532692	-0.561732
209	0.303948	0.154162	-0.865555	-0.0539757		-0.192	0.0215766	0.0292749	0.0138783	-0.192	-0.54683	-0.532312	-0.561348
210	0.306133	0.34607	-1.06905	-1.07044		-0.191	0.0215884	0.0292874	0.0138894	-0.191	-0.546438	-0.531922	-0.560954
211	0.241561	0.34325	-0.742486	0.607774		-0.19	0.0215901	0.0292898	0.0138904	-0.19	-0.546033	-0.53152	-0.560547
212	-0.504715	0.331291	-0.527755	-0.91341		-0.189	0.0215867	0.0292871	0.0138864	-0.189	-0.545619	-0.531109	-0.560128
213	-0.155706	-0.00826465	-0.671907	-0.526918		-0.188	0.0215818	0.0292828	0.0138808	-0.188	-0.545195	-0.530689	-0.559701
214	-0.059097	0.363754	-0.685956	0.365543		-0.187	0.0215795	0.029281	0.013878	-0.187	-0.544761	-0.530259	-0.559263
215	0.446012	0.290225	-1.05321	-1.40273		-0.186	0.021583	0.0292848	0.0138812	-0.186	-0.544319	-0.52982	-0.558817
216	0.0466384	0.793021	-0.00647497	2.72166		-0.185	0.0215949	0.0292968	0.013893	-0.185	-0.543872	-0.529378	-0.558367
217	0.54002	0.469093	-0.485399	0.438944		-0.184	0.0216172	0.0293191	0.0139154	-0.184	-0.543419	-0.528927	-0.55791
218	0.377168	0.629694	-1.36481	0.91586		-0.183	0.0216502	0.0293517	0.0139486	-0.183	-0.542967	-0.528478	-0.557455
219	0.0959729	0.136127	-0.305502	0.348285		-0.182	0.0216931	0.0293942	0.0139921	-0.182	-0.542518	-0.528032	-0.557005
220	0.207008	-0.0958702	0.133825	-0.112812		-0.181	0.0217435	0.0294439	0.0140432	-0.181	-0.542081	-0.527596	-0.556565
221	-0.0832628	-0.17329	-0.990527	0.00735938		-0.18	0.0217978	0.0294972	0.0140984	-0.18	-0.541662	-0.527179	-0.556145
222	-0.019331	-0.264915	-1.68814	-1.28615		-0.179	0.0218519	0.0295502	0.0141536	-0.179	-0.541266	-0.526784	-0.555748
223	0.0860156	-0.233739	-1.06065	-0.765673		-0.178	0.0219014	0.0295984	0.0142045	-0.178	-0.540898	-0.526417	-0.555379
224	0.19431	-0.119398	0.486562	0.693093		-0.177	0.0219424	0.0296378	0.014247	-0.177	-0.540561	-0.526081	-0.555041
225	0.0791953	-0.196492	-0.580468	1.23168		-0.176	0.021972	0.0296658	0.0142783	-0.176	-0.540254	-0.525775	-0.554733
226	0.0966773	-0.101553	0.147122	0.753219		-0.175	0.0219892	0.0296812	0.0142972	-0.175	-0.539979	-0.525501	-0.554456
227	-0.120238	-0.325725	1.08703	-0.186898		-0.174	0.0219943	0.0296845	0.0143041	-0.174	-0.539729	-0.525253	-0.554204
228	-0.0161266	-0.219133	-2.49163	0.839487		-0.173	0.0219899	0.0296783	0.0143015	-0.173	-0.539501	-0.525028	-0.553974
229	0.0734646	-0.376035	-0.499874	-0.635202		-0.172	0.02198	0.0296666	0.0142934	-0.172	-0.539288	-0.524818	-0.553758
230	0.0894029	-0.228259	-0.368031	-0.597018		-0.171	0.0219699	0.0296548	0.0142849	-0.171	-0.539083	-0.524617	-0.553549
231	0.045148	-0.0946333	-1.35206	-0.419567		-0.17	0.0219645	0.029648	0.0142809	-0.17	-0.53888	-0.524418	-0.553342
232	0.331168	0.208724	-1.25396	1.05553		-0.169	0.0219687	0.0296511	0.0142863	-0.169	-0.538675	-0.524217	-0.553132
233	0.407513	0.0552247	-1.09285	1.16451		-0.168	0.0219862	0.0296677	0.0143046	-0.168	-0.538463	-0.52401	-0.552916
234	0.0598121	0.174427	-1.90752	1.32072		-0.167	0.0220198	0.0297009	0.0143387	-0.167	-0.538242	-0.523794	-0.55269
235	-0.0757131	-0.161554	-0.505476	1.1506		-0.166	0.0220706	0.0297516	0.0143896	-0.166	-0.538012	-0.523569	-0.552456
236	-0.110097	-0.195715	-0.865057	0.931755		-0.165	0.0221387	0.0298199	0.0144575	-0.165	-0.537773	-0.523334	-0.552212
237	-0.00666893	-0.0660897	-1.6936	0.567378		-0.164	0.0222223	0.0299039	0.0145407	-0.164	-0.537529	-0.523093	-0.551964
238	-0.165104	-0.26263	-1.60189	0.892839		-0.163	0.0223194	0.0300016	0.0146371	-0.163	-0.537277	-0.522846	-0.551709
239	-0.258235	-0.139869	-0.767531	2.10908		-0.162	0.0224275	0.0301104	0.0147445	-0.162	-0.537023	-0.522595	-0.551451
240	0.0407838	-0.0782404	-0.858488	0.784667		-0.161	0.0225443	0.0302281	0.0148605	-0.161	-0.536762	-0.522337	-0.551187
241	-0.126199	-0.124465	-1.15656	0.795807		-0.16	0.0226683	0.0303529	0.0149837	-0.16	-0.536495	-0.522073	-0.550918
242	0.238892	-0.138001	-0.210115	1.05524		-0.159	0.0227983	0.0304836	0.0151129	-0.159	-0.536222	-0.521802	-0.550643
243	-0.0292634	-0.227106	-0.931047	1.49803		-0.158	0.0229332	0.0306193	0.0152472	-0.158	-0.535944	-0.521524	-0.550363
244	-0.175069	-0.115785	-1.83533	1.54065		-0.157	0.0230721	0.0307588	0.0153854	-0.157	-0.535661	-0.521242	-0.55008
245	-0.0185682	-0.140486	-1.02164	1.13456		-0.156	0.0232132	0.0309005	0.0155259	-0.156	-0.535376	-0.520957	-0.549796
246	0.318878	-0.160209	-0.709101	1.0087		-0.155	0.0233545	0.0310425	0.0156666	-0.155	-0.535093	-0.520673	-0.549514
247	-0.05421	0.0379318	-0.0367764	1.74366		-0.154	0.0234941	0.0311827	0.0158055	-0.154	-0.534812	-0.52039	-0.549234
248	0.0897399	-0.151255	-0.875672	0.125802		-0.153	0.023629	0.0313183	0.0159396	-0.153	-0.534532	-0.520109	-0.548955
249	0.176719	-0.150025	-0.931038	-0.111253		-0.152	0.0237569	0.0314471	0.0160667	-0.152	-0.534253	-0.519828	-0.548678
250	-0.00316518	-0.346656	-0.0150739	-1.45875		-0.151	0.0238759	0.031567	0.0161847	-0.151	-0.533974	-0.519547	-0.5484
251	-0.248319	-0.450631	-0.0956585	1.27189		-0.15	0.0239844	0.0316767	0.0162921	-0.15	-0.533688	-0.51926	-0.548116
252	0.00479891	-0.102519	0.270968	0.841501		-0.149	0.0240824	0.0317759	0.016389	-0.149	-0.533401	-0.518972	-0.54783
253	-0.288927	0.194611	1.20377	-0.452378		-0.148	0.0241715	0.0318662	0.0164768	-0.148	-0.533108	-0.518679	-0.547537
254	0.161637	0.0436097	0.118544	1.22957		-0.147	0.0242546	0.0319505	0.0165587	-0.147	-0.532813	-0.518384	-0.547241
255	0.031794	0.0697362	-0.897565	-0.796278		-0.146	0.0243362	0.0320332	0.0166392	-0.146	-0.532518	-0.518091	-0.546945
256	-0.0458364	-0.0561582	-0.281603	0.631341		-0.145	0.0244215	0.0321195	0.0167234	-0.145	-0.532231	-0.517806	-0.546656
257	-0.0459829	-0.146753	-1.03241	0.0739542		-0.144	0.0245152	0.032214	0.0168164	-0.144	-0.531955	-0.517534	-0.546377
258	-0.358215	-0.336846	-0.345231	-0.0641856		-0.143	0.0246216	0.0323209	0.0169222	-0.143	-0.531697	-0.517279	-0.546115
259	-0.505359	-0.151807	0.0260922	-0.408279		-0.142	0.0247442	0.0324438	0.0170445	-0.142	-0.531458	-0.517045	-0.545872
260	-0.20942	0.292537	-0.276429	-0.381824		-0.141	0.0248842	0.0325838	0.0171846	-0.141	-0.531243	-0.516834	-0.545653
261	-0.0834998	0.083863	-0.281634	0.39072		-0.14	0.0250426	0.0327418	0.0173434	-0.14	-0.531054	-0.516648	-0.545459
262	-0.318944	-0.258658	-0.352045	-0.486246		-0.139	0.0252179	0.0329164	0.0175194	-0.139	-0.53089	-0.516489	-0.545292
263	-0.0485442	-0.0198914	-0.415343	-0.280841		-0.138	0.0254074	0.0331048	0.01771	-0.138	-0.530749	-0.51635	-0.545147
264	0.0476868	0.0130196	-0.0981364	-0.282392		-0.137	0.0256072	0.0333032	0.0179112	-0.137	-0.530625	-0.51623	-0.54502
265	-0.157846	-0.208714	-0.487717	-0.177157		-0.136	0.0258132	0.0335075	0.0181189	-0.136	-0.530512	-0.516119	-0.544905
266	-0.0155094	0.0178263	-0.183061	-0.220696		-0.135	0.0260215	0.0337139	0.0183291	-0.135	-0.530398	-0.516007	-0.54479
267	-0.380725	-0.155464	-0.257864	0.0488824		-0.134	0.0262292	0.0339197	0.0185388	-0.134	-0.530273	-0.515883	-0.544663
268	-0.239138	-0.219995	-0.295378	-0.433973		-0.133	0.0264338	0.0341222	0.0187454	-0.133	-0.530126	-0.515737	-0.544515
269	-0.118213	-0.120655	-0.145344	-0.133568		-0.132	0.0266338	0.0343203	0.0189472	-0.132	-0.529948	-0.51556	-0.544337
270	-0.136194	0.280701	-0.227016	-0.066781		-0.131	0.0268278	0.0345127	0.0191429	-0.131	-0.529731	-0.515343	-0.544119
271	-0.222913	0.262708	-0.102561	-0.26275		-0.13	0.0270138	0.0346973	0.0193303	-0.13	-0.529476	-0.515089	-0.543864
272	-0.116942	0.124682	-0.190798	-0.23987		-0.129	0.0271899	0.0348723	0.0195075	-0.129	-0.529182	-0.514795	-0.543569
273	-0.443712	-0.140358	-0.0598027	-0.0275246		-0.128	0.0273533	0.0350349	0.0196717	-0.128	-0.528855	-0.514469	-0.543241
274	-0.140731	0.255531	-0.288133	-0.0995342		-0.127	0.0275011	0.0351822	0.01982	-0.127	-0.5285	-0.514115	-0.542884
275	-0.270103	-0.130128	-0.0301486	0.249142		-0.126	0.0276309	0.0353117	0.0199501	-0.126	-0.528123	-0.51374	-0.542507
276	-0.243324	0.0863715	-0.450368	0.0873663		-0.125	0.0277397	0.0354204	0.020059	-0.125	-0.527733	-0.513352	-0.542114
277	-0.224159	0.2471	-0.71847	-0.00548845		-0.124	0.0278259	0.0355066	0.0201452	-0.124	-0.527333	-0.512954	-0.541712
278	0.014548	0.19465	-0.981421	0.0170851		-0.123	0.0278886	0.0355694	0.0202077	-0.123	-0.526927	-0.512551	-0.541304
279	-0.297235	0.015268	-0.558101	-0.0606507		-0.122	0.0279278	0.0356088	0.0202468	-0.122	-0.526518	-0.512145	-0.540892
280	-0.0829319	-0.0198239	-0.341549	0.293826		-0.121	0.0279455	0.0356267	0.0202644	-0.121	-0.526109	-0.511738	-0.54048
281	-0.437877	0.159862	-0.388393	-0.143304		-0.12	0.0279451	0.0356263	0.0202638	-0.12	-0.525702	-0.511333	-0.54007
282	-0.139297	0.00882204	-0.0903059	0.128712		-0.119	0.0279306	0.0356119	0.0202493	-0.119	-0.525299	-0.510934	-0.539664
283	-0.165312	0.145895	-1.00903	0.152571		-0.118	0.0279063	0.0355876	0.020225	-0.118	-0.524905	-0.510542	-0.539267
284	-0.281145	0.039073	-0.253945	-0.422823		-0.117	0.0278773	0.0355586	0.0201959	-0.117	-0.524521	-0.510162	-0.538881
285	-0.301286	-0.000765923	-0.923006	-0.308914		-0.116	0.0278477	0.0355291	0.0201664	-0.116	-0.524155	-0.509799	-0.538512
286	-0.164929	0.0787013	-0.390814	0.243113		-0.115	0.0278226	0.035504	0.0201412	-0.115	-0.52381	-0.509456	-0.538163
287	-0.0032684	0.0935185	-0.400331	0.682618		-0.114	0.027806	0.0354875	0.0201245	-0.114	-0.523489	-0.509138	-0.53784
288	0.0580339	0.349748	-0.0115925	0.616669		-0.113	0.027802	0.0354836	0.0201204	-0.113	-0.523197	-0.508849	-0.537544
289	0.317665	0.0952384	-0.40255	0.313118		-0.112	0.0278135	0.0354951	0.0201318	-0.112	-0.522934	-0.50859	-0.537278
290	-0.28238	0.123159	0.0220406	0.632807		-0.111	0.0278419	0.0355236	0.0201603	-0.111	-0.5227	-0.508359	-0.53704
291	-0.214157	0.388352	-0.212591	0.792661		-0.11	0.0278883	0.0355699	0.0202067	-0.11	-0.522488	-0.508152	-0.536825
292	-0.440793	0.155333	-0.359865	0.409842		-0.109	0.0279529	0.0356343	0.0202715	-0.109	-0.522296	-0.507963	-0.536628
293	-0.138208	-0.278603	-0.0475893	0.380904		-0.108	0.0280353	0.0357163	0.0203543	-0.108	-0.522114	-0.507786	-0.536442
294	-0.424164	-0.00683106	-0.0567224	0.528095		-0.107	0.0281347	0.0358152	0.0204542	-0.107	-0.521933	-0.507609	-0.536256
295	-0.297874	0.354255	0.137578	0.287068		-0.106	0.0282497	0.0359295	0.0205699	-0.106	-0.521746	-0.507426	-0.536065
296	0.115603	0.0450194	-0.105264	0.283397		-0.105	0.0283779	0.0360569	0.020699	-0.105	-0.52155	-0.507235	-0.535865
297	-0.440592	0.286604	0.171787	0.137333		-0.104	0.0285164	0.0361944	0.0208384	-0.104	-0.521345	-0.507034	-0.535656
298	-0.216655	0.0844323	-0.256853	0.15551		-0.103	0.0286617	0.0363386	0.0209848	-0.103	-0.521127	-0.50682	-0.535434
299	-0.249051	0.0337514	0.0662322	0.379556		-0.102	0.0288107	0.0364863	0.0211351	-0.102	-0.5209	-0.506597	-0.535203
300	-0.424481	0.0646462	-0.0328967	0.0212001		-0.101	0.02896	0.0366343	0.0212857	-0.101	-0.520665	-0.506366	-0.534965
301	0.263099	0.155879	-0.308534	0.0517808		-0.1	0.0291072	0.03678	0.0214344	-0.1	-0.520424	-0.506128	-0.53472
302	-0.372393	0.254327	-0.167641	0.0897287		-0.099	0.029251	0.0369224	0.0215796	-0.099	-0.520173	-0.505881	-0.534465
303	-0.150239	0.00572821	-0.329065	0.192605		-0.098	0.0293911	0.037061	0.0217211	-0.098	-0.519912	-0.505624	-0.5342
304	-0.356057	0.219255	-0.160555	-0.0301696		-0.097	0.029528	0.0371965	0.0218594	-0.097	-0.519639	-0.505355	-0.533924
305	-0.010407	0.0385482	-0.112899	0.0834601		-0.096	0.0296634	0.0373307	0.0219962	-0.096	-0.519354	-0.505073	-0.533635
306	0.0719077	0.45994	0.0106647	0.255397		-0.095	0.0297995	0.0374655	0.0221334	-0.095	-0.519052	-0.504775	-0.53333
307	0.326099	0.0800606	0.117606	0.129677		-0.094	0.0299379	0.0376029	0.022273	-0.094	-0.518736	-0.504462	-0.533011
308	0.352193	0.271364	-0.302084	0.19386		-0.093	0.0300802	0.0377442	0.0224163	-0.093	-0.518405	-0.504134	-0.532676
309	0.236451	0.347804	0.382367	0.532388		-0.092	0.0302269	0.03789	0.0225639	-0.092	-0.518062	-0.503794	-0.53233
310	-0.255501	0.112658	-0.0385793	0.345288		-0.091	0.0303781	0.0380403	0.022716	-0.091	-0.517707	-0.503441	-0.531972
311	-0.247904	0.38292	-0.242999	0.381856		-0.09	0.0305333	0.0381946	0.0228721	-0.09	-0.517342	-0.503079	-0.531606
312	-0.206341	-0.114836	-0.00389596	0.0475994		-0.089	0.030691	0.0383514	0.0230306	-0.089	-0.516972	-0.50271	-0.531234
313	-0.353164	0.126301	0.144097	0.213684		-0.088	0.0308491	0.0385086	0.0231895	-0.088	-0.516598	-0.502337	-0.53086
314	-0.586723	-0.0226194	-0.240232	0.365574		-0.087	0.0310046	0.0386633	0.0233458	-0.087	-0.516223	-0.501962	-0.530484
315	-0.274254	-0.0930335	-0.124332	0.47085		-0.086	0.031154	0.0388119	0.023496	-0.086	-0.515853	-0.501592	-0.530113
316	-0.293792	0.161359	-0.24766	0.250238		-0.085	0.0312937	0.0389508	0.0236365	-0.085	-0.515486	-0.501226	-0.529745
317	-0.184858	0.272291	-0.474323	0.0296224		-0.084	0.0314214	0.0390778	0.023765	-0.084	-0.515123	-0.500864	-0.529382
318	-0.344857	-0.00762502	0.0779165	0.624305		-0.083	0.0315361	0.0391919	0.0238804	-0.083	-0.514764	-0.500505	-0.529022
319	0.127957	0.275992	-0.480637	0.296459		-0.082	0.0316388	0.0392939	0.0239838	-0.082	-0.514405	-0.500148	-0.528662
320	-0.218082	0.0487143	0.0817468	0.401833		-0.081	0.0317314	0.0393859	0.024077	-0.081	-0.514044	-0.499789	-0.5283
321	-0.054371	-0.118176	-0.0142787	0.314604		-0.08	0.0318173	0.0394712	0.0241634	-0.08	-0.513681	-0.499428	-0.527935
322	0.149644	0.444247	-0.00746596	0.508139		-0.079	0.0319002	0.0395536	0.0242467	-0.079	-0.513317	-0.499067	-0.527568
323	-0.342301	-0.0880804	-0.531511	0.0657842		-0.078	0.0319835	0.0396366	0.0243303	-0.078	-0.512958	-0.498711	-0.527205
324	-0.107434	0.333335	-0.538007	-0.0544358		-0.077	0.0320706	0.0397235	0.0244176	-0.077	-0.512605	-0.498362	-0.526848
325	-0.0537105	0.104848	-0.916529	0.471499		-0.076	0.0321632	0.039816	0.0245104	-0.076	-0.512268	-0.49803	-0.526506
326	-0.128483	0.330766	-0.591819	0.72565		-0.075	0.0322627	0.0399155	0.0246099	-0.075	-0.511953	-0.49772	-0.526186
327	-0.124158	0.307309	-0.244551	0.223991		-0.074	0.0323688	0.0400217	0.0247159	-0.074	-0.511665	-0.497437	-0.525892
328	0.202711	0.326751	-0.279935	0.204547		-0.073	0.0324809	0.040134	0.0248278	-0.073	-0.511404	-0.497183	-0.525626
329	-0.348797	-0.0347496	-0.265774	0.24162		-0.072	0.0325975	0.0402509	0.024944	-0.072	-0.511174	-0.496958	-0.525389
330	-0.0119149	-0.051739	0.0437195	0.687958		-0.071	0.0327169	0.0403708	0.025063	-0.071	-0.510968	-0.496758	-0.525178
331	-0.0658833	0.174735	-0.422123	-0.0450946		-0.07	0.0328378	0.0404923	0.0251834	-0.07	-0.510783	-0.496578	-0.524988
332	-0.360195	-0.139966	-0.830401	0.00252906		-0.069	0.0329585	0.0406136	0.0253034	-0.069	-0.51061	-0.49641	-0.52481
333	-0.164245	0.190622	-0.415677	0.244587		-0.068	0.0330781	0.0407339	0.0254224	-0.068	-0.510445	-0.496249	-0.524641
334	-0.153274	0.2209	-1.19001	0.448342		-0.067	0.0331952	0.0408516	0.0255388	-0.067	-0.510281	-0.496088	-0.524473
335	-0.203877	0.341192	-0.179346	0.806212		-0.066	0.0333086	0.0409657	0.0256515	-0.066	-0.510108	-0.495917	-0.524298
336	-0.203019	-0.0705546	-0.0228781	0.802686		-0.065	0.0334158	0.0410735	0.0257582	-0.065	-0.509924	-0.495736	-0.524113
337	-0.321987	-0.0114317	-1.39517	-0.120181		-0.064	0.0335144	0.0411726	0.0258561	-0.064	-0.509724	-0.495537	-0.523912
338	-0.179576	0.291443	-0.667933	1.1391		-0.063	0.0336008	0.0412596	0.025942	-0.063	-0.509504	-0.495317	-0.523691
339	0.0370797	0.443064	-0.00649692	0.180583		-0.062	0.0336717	0.0413309	0.0260124	-0.062	-0.509262	-0.495075	-0.523449
340	-0.607118	0.181067	-0.281688	0.748974		-0.061	0.0337231	0.0413827	0.0260636	-0.061	-0.508996	-0.494809	-0.523183
341	-0.166769	0.193144	-0.906601	0.0123191		-0.06	0.0337528	0.0414125	0.0260931	-0.06	-0.508704	-0.494517	-0.52289
342	-0.130133	0.465375	-0.678608	0.321205		-0.059	0.033759	0.0414186	0.0260994	-0.059	-0.508385	-0.494199	-0.522572
343	-0.0843518	0.0189551	-0.660355	0.737982		-0.058	0.0337425	0.0414018	0.0260832	-0.058	-0.50804	-0.493855	-0.522226
344	-0.239793	-0.28811	-0.0449124	0.863569		-0.057	0.0337074	0.0413661	0.0260488	-0.057	-0.507671	-0.493486	-0.521855
345	0.078261	0.137866	-0.62447	0.111276		-0.056	0.0336598	0.0413175	0.0260021	-0.056	-0.507276	-0.493093	-0.52146
346	0.299296	0.153625	-0.257602	0.807284		-0.055	0.0336075	0.041264	0.0259509	-0.055	-0.50686	-0.492678	-0.521041
347	0.00387112	-0.314381	-0.0561921	0.576456		-0.054	0.0335588	0.0412138	0.0259037	-0.054	-0.506425	-0.492245	-0.520605
348	-0.295125	-0.450188	-0.644381	0.0884542		-0.053	0.0335221	0.0411754	0.0258688	-0.053	-0.505977	-0.491799	-0.520155
349	-0.407584	-0.409947	-0.43013	0.632341		-0.052	0.0335042	0.0411555	0.0258529	-0.052	-0.50552	-0.491343	-0.519696
350	-0.295093	-0.294101	-0.557502	0.780752		-0.051	0.0335107	0.0411597	0.0258617	-0.051	-0.505062	-0.490887	-0.519236
351	-0.0243386	-0.394589	-0.299476	-0.178416		-0.05	0.033546	0.0411926	0.0258995	-0.05	-0.504609	-0.490436	-0.518781
352	0.233267	-0.210893	-0.613636	0.808987		-0.049	0.0336131	0.0412569	0.0259692	-0.049	-0.504167	-0.489997	-0.518338
353	0.140744	-0.0675487	-0.102459	1.11109		-0.048	0.0337136	0.0413546	0.0260726	-0.048	-0.503741	-0.489573	-0.51791
354	0.184893	0.0619206	-0.680844	0.249289		-0.047	0.0338476	0.0414857	0.0262095	-0.047	-0.503331	-0.489164	-0.517498
355	0.347458	-0.132605	-0.398894	0.200778		-0.046	0.0340135	0.0416488	0.0263783	-0.046	-0.502935	-0.48877	-0.5171
356	0.0380565	-0.148949	-0.560961	0.845748		-0.045	0.034208	0.0418406	0.0265755	-0.045	-0.502551	-0.488388	-0.516715
357	0.0728362	-0.0999765	-0.620656	0.691461		-0.044	0.0344268	0.0420569	0.0267967	-0.044	-0.502177	-0.488015	-0.516339
358	0.00100025	-0.0722624	-0.272574	0.53845		-0.043	0.0346649	0.0422928	0.0270369	-0.043	-0.501809	-0.487649	-0.51597
359	0.248185	0.0711656	-0.280207	0.436537		-0.042	0.0349159	0.0425421	0.0272897	-0.042	-0.501448	-0.487289	-0.515608
360	-0.155068	-0.0819517	-0.86381	-0.168402		-0.041	0.0351741	0.042799	0.0275493	-0.041	-0.501093	-0.486934	-0.515251
361	0.186084	-0.205123	0.077902	0.355533		-0.04	0.035433	0.0430569	0.0278091	-0.04	-0.500743	-0.486585	-0.514901
362	0.150478	-0.0116607	-0.162813	0.728858		-0.039	0.0356865	0.0433098	0.0280633	-0.039	-0.500401	-0.486243	-0.514559
363	-0.203007	-0.126898	-0.233821	0.917309		-0.038	0.0359299	0.0435528	0.028307	-0.038	-0.500065	-0.485907	-0.514223
364	0.115194	0.106036	-0.494143	0.26773		-0.037	0.0361598	0.0437827	0.028537	-0.037	-0.499734	-0.485576	-0.513893
365	0.0676317	0.17463	-0.554631	0.049111		-0.036	0.0363743	0.0439972	0.0287514	-0.036	-0.499408	-0.48525	-0.513567
366	-0.0927391	-0.302886	-1.24919	1.0845		-0.035	0.0365729	0.044196	0.0289499	-0.035	-0.499083	-0.484924	-0.513242
367	0.0563162	-0.167501	-0.216386	0.619762		-0.034	0.0367556	0.0443789	0.0291324	-0.034	-0.498757	-0.484598	-0.512916
368	0.106833	0.175353	-0.27744	0.863784		-0.033	0.0369233	0.0445467	0.0292999	-0.033	-0.498432	-0.484273	-0.512592
369	-0.0187929	-0.383275	-0.356278	0.888652		-0.032	0.0370772	0.0447006	0.0294537	-0.032	-0.498105	-0.483946	-0.512264
370	0.0509165	-0.053742	-0.700951	0.0727867		-0.031	0.037219	0.0448424	0.0295955	-0.031	-0.497776	-0.483618	-0.511934
371	0.116148	0.11168	-0.42235	0.693164		-0.03	0.0373505	0.0449739	0.0297272	-0.03	-0.497446	-0.483289	-0.511603
372	-0.188799	0.209986	-0.976915	0.205238		-0.029	0.0374733	0.0450965	0.02985	-0.029	-0.497116	-0.48296	-0.511271
373	0.0890635	-0.0550415	-0.386462	0.765095		-0.028	0.0375881	0.0452112	0.0299649	-0.028	-0.496788	-0.482635	-0.510942
374	-0.0945294	0.0613354	0.00211009	0.569302		-0.027	0.0376956	0.0453186	0.0300726	-0.027	-0.496469	-0.482319	-0.51062
375	-0.108814	0.174944	-1.05755	0.998748		-0.026	0.0377966	0.0454195	0.0301737	-0.026	-0.496163	-0.482015	-0.510311
376	-0.057924	0.058817	-0.147872	0.762467		-0.025	0.037892	0.0455148	0.0302691	-0.025	-0.495873	-0.481729	-0.510018
377	-0.319011	-0.0126249	-0.287558	0.486053		-0.024	0.0379831	0.045606	0.0303603	-0.024	-0.495603	-0.481462	-0.509745
378	-0.111544	-0.238501	-0.277414	0.498125		-0.023	0.0380722	0.045695	0.0304493	-0.023	-0.49536	-0.481222	-0.509498
379	-0.298816	-0.329457	-1.11221	0.604254		-0.022	0.0381619	0.0457848	0.0305389	-0.022	-0.495141	-0.481007	-0.509275
380	-0.0209753	-0.0377049	-0.0624284	0.642099		-0.021	0.0382554	0.0458785	0.0306324	-0.021	-0.494945	-0.480815	-0.509075
381	0.0119747	-0.114212	-0.762432	0.566057		-0.02	0.0383558	0.045979	0.0307327	-0.02	-0.494767	-0.480641	-0.508892
382	-0.126266	-0.35916	-0.367414	0.463468		-0.019	0.0384655	0.0460887	0.0308423	-0.019	-0.4946	-0.480478	-0.508722
383	-0.421484	0.104931	-0.841782	0.424174		-0.018	0.0385862	0.0462095	0.0309629	-0.018	-0.49444	-0.480322	-0.508559
384	-0.1901	-0.224949	-0.493765	0.478864		-0.017	0.0387182	0.0463415	0.0310949	-0.017	-0.494281	-0.480165	-0.508397
385	-0.329761	0.209621	-1.08577	0.793423		-0.016	0.0388611	0.0464842	0.031238	-0.016	-0.494118	-0.480005	-0.508232
386	-0.174856	-0.150849	-0.520293	1.44817		-0.015	0.0390137	0.0466365	0.0313909	-0.015	-0.493946	-0.479834	-0.508057
387	0.00429826	-0.17381	-0.326656	0.634885		-0.014	0.0391741	0.0467965	0.0315518	-0.014	-0.49376	-0.47965	-0.50787
388	-0.0462802	0.523795	-0.268853	0.438349		-0.013	0.0393398	0.0469615	0.0317182	-0.013	-0.493559	-0.47945	-0.507668
389	0.158128	0.160337	0.886501	2.19929		-0.012	0.0395077	0.0471285	0.0318868	-0.012	-0.493341	-0.479232	-0.507449
390	-0.0128317	0.163869	-0.492325	0.762022		-0.011	0.0396745	0.0472944	0.0320547	-0.011	-0.493102	-0.478994	-0.507211
391	-0.278308	-0.434525	-0.40372	0.346781		-0.01	0.0398375	0.0474562	0.0322188	-0.01	-0.492845	-0.478736	-0.506953
392	-0.0748892	0.0541893	-0.219764	0.610991		-0.009	0.039994	0.0476114	0.0323765	-0.009	-0.492569	-0.47846	-0.506678
393	-0.0806746	0.149675	-0.262199	0.435343		-0.008	0.0401428	0.047759	0.0325266	-0.008	-0.492278	-0.478168	-0.506388
394	-0.263371	-0.00607803	-0.596892	0.249609		-0.007	0.040284	0.0478989	0.0326692	-0.007	-0.491971	-0.47786	-0.506082
395	-0.0392502	0.293435	-0.286717	0.596206		-0.006	0.0404192	0.0480326	0.0328057	-0.006	-0.49165	-0.477537	-0.505763
396	-0.206309	0.168982	-1.10313	0.310684		-0.005	0.0405509	0.048163	0.0329387	-0.005	-0.491316	-0.477201	-0.505431
397	-0.0515092	0.112935	-0.486774	0.264268		-0.004	0.0406823	0.0482931	0.0330714	-0.004	-0.490973	-0.476855	-0.50509
398	-0.0486085	0.26685	-1.201	0.162563		-0.003	0.0408162	0.0484258	0.0332066	-0.003	-0.490621	-0.476501	-0.504741
399	0.126268	-0.00320273	-0.643052	0.479941		-0.002	0.0409549	0.0485633	0.0333465	-0.002	-0.490265	-0.476142	-0.504388
400	-0.0811621	0.109697	-1.4239	0.270504		-0.001	0.0410997	0.0487071	0.0334923	-0.001	-0.489911	-0.475784	-0.504037
401	-0.285268	-0.109368	-1.32504	0.0157367		0	0.0412508	0.0488573	0.0336442	0	-0.489565	-0.475434	-0.503695
402	-0.592079	-0.162841	-0.55121	0.59835		0.001	0.0414074	0.0490132	0.0338016	0.001	-0.489232	-0.475097	-0.503366
403	-0.463657	0.144242	-0.443917	1.33608		0.002	0.0415677	0.0491729	0.0339625	0.002	-0.488918	-0.47478	-0.503056
404	-0.463257	0.0596216	-0.572465	1.24481		0.003	0.0417287	0.0493335	0.034124	0.003	-0.488623	-0.474482	-0.502765
405	-0.160131	0.163112	-0.56874	1.09189		0.004	0.0418882	0.0494926	0.0342837	0.004	-0.488348	-0.474204	-0.502493
406	-0.502487	0.0508305	-0.284972	0.518517		0.005	0.0420438	0.0496481	0.0344395	0.005	-0.48809	-0.473943	-0.502238
407	-0.250652	-0.0108844	-0.335326	0.822867		0.006	0.0421954	0.0497996	0.0345911	0.006	-0.487842	-0.473693	-0.501991
408	-0.0768496	0.168592	-0.999688	0.203602		0.007	0.0423437	0.049948	0.0347395	0.007	-0.487599	-0.473448	-0.501749
409	-0.203512	-0.13485	-0.487862	0.60583		0.008	0.0424913	0.0500956	0.034887	0.008	-0.48735	-0.473199	-0.501501
410	-0.380288	-0.0425008	-1.30489	0.572188		0.009	0.042641	0.0502454	0.0350367	0.009	-0.487093	-0.472942	-0.501244
411	0.584944	0.521289	-0.25103	0.188663		0.01	0.0427957	0.0504001	0.0351914	0.01	-0.48682	-0.472669	-0.50097
412	-0.293804	0.237558	-0.792305	1.17423		0.011	0.0429576	0.050562	0.0353533	0.011	-0.486531	-0.472382	-0.50068
413	-0.271094	-0.0910399	-0.281801	0.286969		0.012	0.0431282	0.0507325	0.035524	0.012	-0.486223	-0.472077	-0.50037
414	-0.415326	0.128966	-0.564074	0.742608		0.013	0.0433081	0.0509122	0.035704	0.013	-0.485905	-0.471761	-0.500049
415	0.0193983	0.152916	-0.464152	0.865062		0.014	0.0434971	0.0511008	0.0358933	0.014	-0.485578	-0.471437	-0.499719
416	0.108624	-0.0348204	-0.729673	0.360662		0.015	0.043694	0.0512973	0.0360908	0.015	-0.485252	-0.471114	-0.499389
417	0.231641	0.284552	-0.590094	0.784385		0.016	0.0438975	0.0515003	0.0362948	0.016	-0.484932	-0.470798	-0.499067
418	-0.31089	0.105807	-0.493477	0.748799		0.017	0.0441056	0.0517076	0.0365036	0.017	-0.484626	-0.470495	-0.498757
419	-0.277355	0.230715	-0.0153501	0.3112		0.018	0.0443159	0.051917	0.0367147	0.018	-0.484337	-0.47021	-0.498465
420	-0.282595	-0.0576091	-0.25365	0.343418		0.019	0.0445258	0.052126	0.0369256	0.019	-0.484068	-0.469943	-0.498192
421	-0.162239	0.119134	-0.87403	0.547809		0.02	0.0447328	0.0523319	0.0371337	0.02	-0.483816	-0.469695	-0.497937
422	-0.3052	-0.0189954	-0.210342	0.470182		0.021	0.0449349	0.0525329	0.0373369	0.021	-0.483579	-0.46946	-0.497698
423	-0.338815	-0.0265408	-0.388579	0.753091		0.022	0.0451308	0.0527276	0.037534	0.022	-0.483353	-0.469237	-0.49747
424	-0.665507	-0.197051	-0.501448	0.465335		0.023	0.0453198	0.0529154	0.0377241	0.023	-0.483137	-0.469022	-0.497252
425	0.136252	0.249355	-0.065137	0.39103		0.024	0.0455014	0.0530959	0.0379068	0.024	-0.482926	-0.468813	-0.49704
426	0.120255	0.100444	-0.221252	0.869032		0.025	0.0456748	0.0532682	0.0380813	0.025	-0.482719	-0.468606	-0.496832
427	-0.307792	0.211936	-0.27381	0.814504		0.026	0.0458386	0.0534311	0.0382462	0.026	-0.482515	-0.468402	-0.496628
428	-0.394153	0.249472	-0.493695	0.764727		0.027	0.0459906	0.0535821	0.038399	0.027	-0.482314	-0.468201	-0.496427
429	0.113456	0.158302	-0.188577	0.849878		0.028	0.0461279	0.0537186	0.0385372	0.028	-0.482116	-0.468003	-0.496229
430	-0.259605	0.370703	-0.354243	0.804232		0.029	0.0462482	0.0538381	0.0386582	0.029	-0.481922	-0.467809	-0.496035
431	-0.322212	0.114027	-0.146702	0.75374		0.03	0.0463502	0.0539394	0.0387611	0.03	-0.481729	-0.467616	-0.495843
432	-0.193892	0.168428	-0.291609	0.503698		0.031	0.046435	0.0540235	0.0388465	0.031	-0.481538	-0.467424	-0.495653
433	0.0716441	-0.131177	-0.543632	0.90543		0.032	0.0465052	0.054093	0.0389173	0.032	-0.481346	-0.467231	-0.495461
434	-0.623896	-0.36737	-0.0777591	0.694971		0.033	0.0465652	0.0541525	0.0389779	0.033	-0.48115	-0.467034	-0.495266
435	-0.188517	0.0106734	-0.466944	1.02696		0.034	0.0466208	0.0542077	0.0390338	0.034	-0.48095	-0.466833	-0.495066
436	-0.502251	-0.0744844	-0.841969	0.283143		0.035	0.0466768	0.0542634	0.0390901	0.035	-0.480742	-0.466625	-0.49486
437	-0.021573	0.305513	-0.807167	1.13392		0.036	0.0467375	0.054324	0.0391509	0.036	-0.480529	-0.466409	-0.494648
438	-0.104915	0.171739	-0.376571	0.56262		0.037	0.0468052	0.0543918	0.0392186	0.037	-0.480308	-0.466188	-0.494429
439	-0.111201	-0.0482169	-0.681737	0.96167		0.038	0.0468804	0.0544673	0.0392936	0.038	-0.480085	-0.465962	-0.494208
440	-0.42377	0.246265	-0.663057	0.307953		0.039	0.0469627	0.05455	0.0393754	0.039	-0.479859	-0.465734	-0.493983
441	-0.223898	0.172475	-0.277098	0.490634		0.04	0.0470499	0.0546378	0.039462	0.04	-0.479634	-0.465507	-0.49376
442	0.0503247	0.22831	-0.42581	0.554543		0.041	0.0471397	0.0547283	0.0395512	0.041	-0.479412	-0.465283	-0.49354
443	-0.425717	0.267891	-0.209217	1.12981		0.042	0.0472296	0.0548189	0.0396403	0.042	-0.479193	-0.465062	-0.493323
444	-0.422787	-0.246135	-0.408437	0.453353		0.043	0.0473171	0.0549071	0.0397271	0.043	-0.478977	-0.464844	-0.493109
445	-0.425815	0.383158	-0.491691	0.7888		0.044	0.0474	0.0549907	0.0398094	0.044	-0.47876	-0.464626	-0.492894
446	0.25616	0.431829	-0.765061	-0.38247		0.045	0.047478	0.0550692	0.0398869	0.045	-0.478538	-0.464402	-0.492674
447	-0.171257	0.0432958	-0.51401	-0.0601421		0.046	0.0475518	0.0551433	0.0399604	0.046	-0.478309	-0.464172	-0.492446
448	-0.149192	0.105498	-0.374512	0.719969		0.047	0.0476238	0.0552153	0.0400322	0.047	-0.478067	-0.463929	-0.492204
449	0.12517	0.148823	-0.197823	0.737511		0.048	0.0476972	0.0552886	0.0401057	0.048	-0.477809	-0.463672	-0.491947
450	-0.603998	0.430313	-0.503129	0.320446		0.049	0.0477757	0.0553669	0.0401845	0.049	-0.477534	-0.463397	-0.491672
451	-0.443047	-0.208009	-0.143673	0.708842		0.05	0.0478627	0.0554535	0.0402719	0.05	-0.477241	-0.463103	-0.491379
452	-0.494703	0.170299	0.154642	0.371377		0.051	0.0479608	0.0555513	0.0403704	0.051	-0.47693	-0.462792	-0.491067
453	0.170967	0.0388386	0.0433381	0.768851		0.052	0.0480723	0.0556624	0.0404823	0.052	-0.476602	-0.462465	-0.490739
454	-0.27314	0.0968204	-0.534205	0.337972		0.053	0.0481983	0.055788	0.0406086	0.053	-0.476261	-0.462124	-0.490398
455	0.12111	-0.01459	-1.17651	0.555647		0.054	0.0483389	0.0559285	0.0407494	0.054	-0.47591	-0.461773	-0.490046
456	0.0651072	-0.171955	-0.312108	-0.0528551		0.055	0.0484936	0.0560831	0.0409042	0.055	-0.475552	-0.461416	-0.489687
457	0.0797721	-0.451351	-1.00713	-0.196028		0.056	0.0486613	0.0562508	0.0410718	0.056	-0.475189	-0.461054	-0.489324
458	-0.250493	-0.258816	-0.231542	0.580165		0.057	0.0488411	0.0564307	0.0412515	0.057	-0.474829	-0.460696	-0.488963
459	0.204643	0.117795	-0.884432	-0.287562		0.058	0.0490326	0.0566223	0.0414428	0.058	-0.474473	-0.460341	-0.488606
460	0.00038465	-0.0623326	-0.370201	0.677189		0.059	0.0492356	0.0568256	0.0416457	0.059	-0.474127	-0.459996	-0.488258
461	0.139778	-0.142443	-0.291595	0.429579		0.06	0.0494502	0.0570404	0.0418599	0.06	-0.473796	-0.459666	-0.487925
462	-0.188435	-0.147177	-0.660137	0.550916		0.061	0.0496757	0.0572664	0.0420851	0.061	-0.473482	-0.459355	-0.48761
463	0.0316922	-0.238417	-0.480348	0.499387		0.062	0.0499111	0.0575023	0.0423199	0.062	-0.473196	-0.45907	-0.487321
464	-0.075333	-0.311615	-0.290448	0.268819		0.063	0.0501544	0.0577462	0.0425627	0.063	-0.472935	-0.458812	-0.487059
465	0.0780172	-0.215473	-0.533394	0.428531		0.064	0.0504034	0.0579958	0.042811	0.064	-0.472704	-0.458583	-0.486826
466	-0.037486	-0.216687	-0.50985	0.449241		0.065	0.0506557	0.0582489	0.0430626	0.065	-0.472501	-0.458381	-0.486621
467	-0.168702	-0.272231	-0.564548	1.51592		0.066	0.0509093	0.0585032	0.0433154	0.066	-0.472322	-0.458204	-0.486441
468	0.0141044	-0.38161	-1.05092	0.977444		0.067	0.0511625	0.0587572	0.0435678	0.067	-0.472158	-0.45804	-0.486275
469	0.238117	0.146461	-0.192663	1.22146		0.068	0.0514134	0.0590089	0.043818	0.068	-0.472	-0.457884	-0.486116
470	0.148643	-0.0210108	-0.625501	0.663351		0.069	0.0516605	0.0592567	0.0440643	0.069	-0.471841	-0.457726	-0.485956
471	0.0246466	-0.461304	-0.937972	0.745167		0.07	0.0519013	0.0594982	0.0443043	0.07	-0.471668	-0.457553	-0.485782
472	-0.0240685	-0.566834	-0.92844	1.22991		0.071	0.0521338	0.0597314	0.0445362	0.071	-0.471476	-0.457362	-0.485591
473	-0.248455	-0.338552	-0.527679	0.805914		0.072	0.0523562	0.0599544	0.044758	0.072	-0.47126	-0.457146	-0.485374
474	-0.182241	-0.114082	-0.489499	0.727219		0.073	0.0525669	0.0601656	0.0449683	0.073	-0.471015	-0.456901	-0.485128
475	-0.362709	-1.01332	-0.154247	0.8257		0.074	0.0527654	0.0603644	0.0451664	0.074	-0.470745	-0.456632	-0.484859
476	-0.0506063	0.0356472	-0.836462	0.129269		0.075	0.0529515	0.0605507	0.0453524	0.075	-0.47045	-0.456337	-0.484563
477	0.0935012	-0.00607678	-0.981917	-0.0810582		0.076	0.0531259	0.0607251	0.0455266	0.076	-0.470135	-0.456022	-0.484248
478	-0.0834269	-0.111695	-0.673908	1.0389		0.077	0.0532891	0.0608882	0.04569	0.077	-0.469807	-0.455694	-0.48392
479	-0.129593	-0.339507	-0.0289672	0.476622		0.078	0.0534429	0.0610418	0.0458441	0.078	-0.469471	-0.455358	-0.483585
480	-0.305256	-0.431881	-0.560383	0.347862		0.079	0.0535891	0.0611876	0.0459906	0.079	-0.469136	-0.455022	-0.48325
481	-0.744609	-0.105582	-0.411124	0.300237		0.08	0.0537301	0.0613282	0.046132	0.08	-0.468806	-0.454691	-0.482921
482	-0.634315	0.279954	-0.272496	1.10879		0.081	0.0538691	0.0614668	0.0462715	0.081	-0.468485	-0.454369	-0.482601
483	0.0646285	-0.0116738	-0.672855	0.160122		0.082	0.0540101	0.0616074	0.0464128	0.082	-0.468176	-0.454059	-0.482293
484	0.109253	-0.157549	-0.400844	0.891678		0.083	0.0541577	0.0617547	0.0465607	0.083	-0.46788	-0.453763	-0.481998
485	-0.355421	-0.308596	-0.448442	0.468081		0.084	0.0543176	0.0619145	0.0467207	0.084	-0.467595	-0.453477	-0.481714
486	-0.101809	0.216444	-0.271733	0.645064		0.085	0.0544949	0.0620919	0.0468979	0.085	-0.46732	-0.4532	-0.48144
487	-0.22978	-0.244993	-0.549206	0.679046		0.086	0.0546941	0.0622914	0.0470968	0.086	-0.467052	-0.452932	-0.481173
488	-0.422716	0.246212	-0.705112	0.73553		0.087	0.0549182	0.062516	0.0473204	0.087	-0.466791	-0.45267	-0.480913
489	-0.319372	0.207072	-0.781836	0.585405		0.088	0.0551678	0.0627663	0.0475692	0.088	-0.466534	-0.452411	-0.480657
490	-0.253925	0.0211462	-0.579528	0.840753		0.089	0.0554412	0.0630406	0.0478418	0.089	-0.466282	-0.452158	-0.480406
491	0.0741723	0.046661	-0.611369	0.520928		0.09	0.0557349	0.0633353	0.0481345	0.09	-0.466037	-0.451912	-0.480162
492	-0.00678713	0.21822	-0.933399	0.624385		0.091	0.0560431	0.0636445	0.0484416	0.091	-0.465797	-0.451672	-0.479923
493	0.123036	-0.228794	-0.509654	0.504154		0.092	0.0563594	0.0639618	0.0487569	0.092	-0.465567	-0.45144	-0.479693
494	-0.125205	0.139868	-0.672202	0.819114		0.093	0.0566769	0.0642803	0.0490735	0.093	-0.465339	-0.451211	-0.479466
495	-0.340508	0.0899488	-0.241948	0.122266		0.094	0.0569899	0.0645942	0.0493856	0.094	-0.465111	-0.450983	-0.479239
496	-0.179869	-0.195354	-0.818919	0.495564		0.095	0.0572941	0.0648992	0.0496891	0.095	-0.46488	-0.450751	-0.479008
497	0.053916	0.714123	-0.362287	0.453078		0.096	0.0575876	0.0651933	0.0499819	0.096	-0.464638	-0.450509	-0.478767
498	-0.0721143	-0.0323694	-0.536954	0.257882		0.097	0.0578706	0.0654768	0.0502645	0.097	-0.464383	-0.450254	-0.478513
499	0.343692	-0.186914	-0.599909	0.44524		0.098	0.0581456	0.0657521	0.0505391	0.098	-0.464113	-0.449983	-0.478242
500	0.227837	-0.0775654	-1.15832	0.763256		0.099	0.0584162	0.0660229	0.0508095	0.099	-0.463826	-0.449696	-0.477956
501	0.0551516	-0.139869	-0.499924	0.67267		0.1	0.0586859	0.0662926	0.0510792	0.1	-0.463526	-0.449396	-0.477656
502	0.0526072	0.0754992	-0.442375	0.594571		0.101	0.0589572	0.0665638	0.0513506	0.101	-0.463215	-0.449085	-0.477345
503	0.0329712	0.0158804	-0.712747	1.05538		0.102	0.0592311	0.0668376	0.0516247	0.102	-0.462898	-0.448768	-0.477027
504	0.107561	0.0677525	-0.0749347	0.356479		0.103	0.0595068	0.0671129	0.0519006	0.103	-0.462576	-0.448446	-0.476706
505	-0.0724605	-0.202237	-0.732421	0.559823		0.104	0.0597815	0.0673875	0.0521756	0.104	-0.462254	-0.448125	-0.476384
506	0.297225	-0.0770131	-0.537712	0.442339		0.105	0.0600518	0.0676574	0.0524461	0.105	-0.461937	-0.447808	-0.476066
507	-0.202414	0.128973	-0.960099	1.0343		0.106	0.0603135	0.0679189	0.0527081	0.106	-0.461625	-0.447496	-0.475754
508	0.305418	-0.308579	-0.612346	0.294944		0.107	0.0605632	0.0681684	0.0529579	0.107	-0.461316	-0.447188	-0.475445
509	-0.223099	0.272927	-0.166207	0.660833		0.108	0.0607987	0.0684039	0.0531936	0.108	-0.461019	-0.446891	-0.475146
510	0.261458	0.0545428	-0.739638	0.581944		0.109	0.0610208	0.0686258	0.0534157	0.109	-0.460728	-0.446601	-0.474855
511	0.00277667	0.289722	-0.641537	0.818424		0.11	0.0612326	0.0688377	0.0536275	0.11	-0.460446	-0.44632	-0.474572
512	0.0270906	0.2584	-0.371892	0.446533		0.111	0.0614405	0.0690457	0.0538353	0.111	-0.460169	-0.446044	-0.474294
513	-0.524613	0.277021	-0.76516	0.82423		0.112	0.0616522	0.0692576	0.0540467	0.112	-0.4599	-0.445776	-0.474024
514	-0.153693	-0.239538	-0.470307	0.366663		0.113	0.0618753	0.0694811	0.0542695	0.113	-0.459636	-0.445513	-0.473759
515	0.158682	0.151771	-0.688844	1.12959		0.114	0.0621164	0.0697228	0.05451	0.114	-0.459379	-0.445257	-0.473502
516	-0.291766	-0.0822764	-0.810836	0.321472		0.115	0.0623801	0.0699871	0.054773	0.115	-0.459129	-0.445007	-0.473251
517	-0.0896164	0.0549133	-0.724571	0.331026		0.116	0.0626679	0.0702757	0.0550601	0.116	-0.458886	-0.444764	-0.473008
518	0.0169181	0.510762	-0.826647	0.929604		0.117	0.0629794	0.0705879	0.0553708	0.117	-0.458651	-0.44453	-0.472772
519	-0.0873555	-0.0982027	-0.417305	-0.269554		0.118	0.0633118	0.0709212	0.0557024	0.118	-0.458419	-0.444298	-0.47254
520	-0.0664741	0.44394	-0.76666	1.19253		0.119	0.063661	0.0712712	0.0560508	0.119	-0.458188	-0.444068	-0.472308
521	-0.118298	0.186254	-1.23559	-0.17915		0.12	0.0640221	0.0716331	0.0564111	0.12	-0.457951	-0.443831	-0.47207
522	0.131973	0.518224	-1.32424	0.955889		0.121	0.0643895	0.0720013	0.0567778	0.121	-0.4577	-0.443582	-0.471819
523	0.0251795	0.0437479	-0.721926	0.264599		0.122	0.064758	0.0723703	0.0571457	0.122	-0.45743	-0.443312	-0.471548
524	-0.0361012	-0.372511	-0.765049	0.145746		0.123	0.0651223	0.072735	0.0575096	0.123	-0.457135	-0.443018	-0.471251
525	0.00316485	0.432864	-1.05381	0.642434		0.124	0.0654783	0.0730913	0.0578653	0.124	-0.456812	-0.442697	-0.470927
526	-0.306783	0.332576	-0.755384	0.776601		0.125	0.0658224	0.0734355	0.0582094	0.125	-0.456464	-0.442351	-0.470578
527	0.177335	0.677631	-1.45278	1.10876		0.126	0.0661525	0.0737654	0.0585395	0.126	-0.456095	-0.441983	-0.470207
528	-0.0297899	0.17313	-0.699656	0.542008		0.127	0.0664669	0.0740794	0.0588543	0.127	-0.455711	-0.4416	-0.469822
529	-0.171067	0.137685	-1.10179	0.85068		0.128	0.0667646	0.0743767	0.0591526	0.128	-0.455321	-0.441211	-0.469431
530	0.135345	0.348954	-0.613009	0.721498		0.129	0.0670453	0.0746566	0.0594339	0.129	-0.454933	-0.440824	-0.469041
531	-0.160575	0.271741	-0.8876	1.27872		0.13	0.0673087	0.0749193	0.0596981	0.13	-0.454557	-0.440449	-0.468665
532	-0.0870179	0.296146	-0.690065	0.947553		0.131	0.067555	0.0751648	0.0599452	0.131	-0.454201	-0.440092	-0.468309
533	-0.480563	0.418316	-0.685102	-0.170434		0.132	0.0677844	0.0753935	0.0601753	0.132	-0.453867	-0.439758	-0.467975
534	-0.0648212	0.446587	-1.06836	0.847118		0.133	0.0679976	0.0756061	0.0603892	0.133	-0.45356	-0.439451	-0.467669
535	-0.281109	0.601093	-0.153988	0.0259386		0.134	0.0681958	0.0758038	0.0605878	0.134	-0.453279	-0.439169	-0.467388
536	0.00338954	0.240485	-0.654373	-0.075439		0.135	0.0683811	0.0759888	0.0607734	0.135	-0.453019	-0.438909	-0.467129
537	0.173634	-0.483116	-1.08029	-0.117983		0.136	0.0685567	0.0761643	0.060949	0.136	-0.452778	-0.438668	-0.466888
538	-0.0142822	0.199463	-0.862422	-0.0971092		0.137	0.0687269	0.0763348	0.061119	0.137	-0.452549	-0.438439	-0.466659
539	-0.077949	0.503306	-1.09851	-0.666837		0.138	0.0688965	0.0765049	0.0612882	0.138	-0.452325	-0.438216	-0.466435
540	0.0776859	-0.408052	-1.15134	-0.162992		0.139	0.0690705	0.0766796	0.0614615	0.139	-0.452105	-0.437996	-0.466213
541	-0.180645	0.0854945	-0.459854	0.188269		0.14	0.0692533	0.0768632	0.0616434	0.14	-0.451881	-0.437774	-0.465989
542	0.104293	-0.0235208	-0.734436	-0.446637		0.141	0.0694489	0.0770597	0.061838	0.141	-0.451654	-0.437548	-0.46576
543	-0.0751045	-0.236723	-1.13053	-0.300778		0.142	0.0696607	0.0772726	0.0620489	0.142	-0.451425	-0.437321	-0.465529
544	0.0177355	-0.526927	-0.280875	-0.081187		0.143	0.0698914	0.0775042	0.0622787	0.143	-0.451192	-0.43709	-0.465295
545	-0.070121	-0.190867	-0.882858	-0.104193		0.144	0.0701426	0.077756	0.0625291	0.144	-0.450959	-0.436858	-0.46506
546	0.071649	-0.429169	-0.213838	-0.0505048		0.145	0.0704144	0.0780284	0.0628005	0.145	-0.450726	-0.436626	-0.464825
547	-0.00771207	0.124851	-0.328327	0.206771		0.146	0.0707056	0.0783197	0.0630914	0.146	-0.450495	-0.436396	-0.464593
548	0.20555	-0.394151	-0.095377	0.199928		0.147	0.0710126	0.0786268	0.0633984	0.147	-0.45026	-0.436162	-0.464357
549	-0.0312446	-0.477942	0.208325	0.259401		0.148	0.0713304	0.0789444	0.0637164	0.148	-0.450019	-0.435922	-0.464117
550	0.212195	0.18296	-0.381887	0.251538		0.149	0.0716525	0.0792662	0.0640389	0.149	-0.449772	-0.435675	-0.463869
551	0.0734663	-0.0106879	-0.081663	0.66464		0.15	0.0719715	0.0795848	0.0643583	0.15	-0.449511	-0.435414	-0.463609
552	0.0885977	0.0495354	-0.114764	0.410185		0.151	0.0722804	0.0798932	0.0646676	0.151	-0.449239	-0.435142	-0.463337
553	0.257145	-0.0443516	-0.828789	0.0334211		0.152	0.0725729	0.0801853	0.0649605	0.152	-0.448955	-0.434856	-0.463054
554	-0.0463796	-0.367087	-0.304596	0.356806		0.153	0.0728437	0.0804558	0.0652317	0.153	-0.448661	-0.434561	-0.46276
555	0.302727	0.376241	-0.414762	0.316108		0.154	0.0730886	0.0807003	0.0654768	0.154	-0.448359	-0.434259	-0.46246
556	0.592487	0.818042	-0.868244	0.317631		0.155	0.0733046	0.0809162	0.065693	0.155	-0.448056	-0.433954	-0.462159
557	0.151492	0.0288302	-0.443983	0.101657		0.156	0.0734901	0.0811016	0.0658786	0.156	-0.447754	-0.43365	-0.461858
558	-0.0639087	-0.209694	-0.703807	-0.164985		0.157	0.073645	0.0812563	0.0660336	0.157	-0.447458	-0.433353	-0.461564
559	-0.162857	0.224871	-0.709634	-0.0221605		0.158	0.073771	0.0813823	0.0661598	0.158	-0.447171	-0.433064	-0.461278
560	0.00787789	0.587294	-0.195466	0.24993		0.159	0.0738724	0.0814835	0.0662614	0.159	-0.446893	-0.432785	-0.461002
561	-0.116706	0.200008	-0.305762	0.486407		0.16	0.0739563	0.081567	0.0663455	0.16	-0.446626	-0.432515	-0.460736
562	0.0855929	0.327244	-0.290821	0.144375		0.161	0.074032	0.0816423	0.0664217	0.161	-0.446369	-0.432256	-0.460482
563	-0.119596	0.3056	-0.326029	0.198637		0.162	0.0741114	0.081721	0.0665018	0.162	-0.446124	-0.432009	-0.460238
564	-0.0163943	0.429421	-0.715941	0.488742		0.163	0.0742064	0.0818152	0.0665976	0.163	-0.445888	-0.431771	-0.460004
565	-0.045137	0.0711319	-0.409573	0.344304		0.164	0.0743288	0.0819365	0.0667211	0.164	-0.445665	-0.431546	-0.459783
566	-0.191854	-0.314264	-0.789951	0.377187		0.165	0.0744875	0.082094	0.0668811	0.165	-0.445455	-0.431334	-0.459575
567	-0.305137	0.010106	-0.296458	0.372011		0.166	0.0746889	0.082294	0.0670838	0.166	-0.44526	-0.431138	-0.459383
568	-0.0718771	-0.453133	-0.652387	0.255079		0.167	0.0749357	0.0825394	0.067332	0.167	-0.445082	-0.430958	-0.459206
569	0.366174	0.0514297	-0.511496	-0.0998312		0.168	0.0752276	0.0828298	0.0676254	0.168	-0.444921	-0.430795	-0.459046
570	0.151103	0.159325	-0.695106	0.257572		0.169	0.075561	0.0831618	0.0679603	0.169	-0.444779	-0.430652	-0.458906
571	0.202568	-0.0991115	-0.455465	0.347721		0.17	0.0759303	0.0835297	0.0683309	0.17	-0.444651	-0.430523	-0.458779
572	-0.120433	-0.0758329	-0.579505	0.244088		0.171	0.0763282	0.0839264	0.06873	0.171	-0.444536	-0.430407	-0.458665
573	-0.119273	0.57396	-0.346937	0.386424		0.172	0.0767473	0.0843444	0.0691502	0.172	-0.444427	-0.430297	-0.458557
574	0.00107094	0.242245	-0.958344	0.227933		0.173	0.0771802	0.0847764	0.069584	0.173	-0.444319	-0.430188	-0.45845
575	-0.339995	-0.0624811	-0.340301	0.34054		0.174	0.0776206	0.0852162	0.070025	0.174	-0.444203	-0.430071	-0.458335
576	-0.204828	-0.0348499	-0.315926	0.336043		0.175	0.0780631	0.0856583	0.0704679	0.175	-0.444075	-0.429942	-0.458207
577	-0.268789	0.0783329	-0.307828	-0.00476652		0.176	0.0785028	0.0860979	0.0709078	0.176	-0.443926	-0.429792	-0.45806
578	-0.131296	-0.099657	-0.745357	0.168546		0.177	0.0789367	0.0865317	0.0713416	0.177	-0.443755	-0.42962	-0.45789
579	0.119262	0.22979	-0.568797	0.147856		0.178	0.0793609	0.0869562	0.0717657	0.178	-0.44356	-0.429423	-0.457696
580	-0.107336	-0.204169	-0.561848	0.51834		0.179	0.079772	0.0873675	0.0721765	0.179	-0.443339	-0.429201	-0.457477
581	-0.0599114	-0.033946	-0.672999	0.349237		0.18	0.080166	0.0877617	0.0725702	0.18	-0.443094	-0.428955	-0.457233
582	-0.0429246	0.104045	-0.426604	0.277379		0.181	0.0805389	0.0881348	0.0729429	0.181	-0.442827	-0.428687	-0.456968
583	-0.542975	0.447701	-0.511356	0.504195		0.182	0.080887	0.0884831	0.0732909	0.182	-0.442538	-0.428396	-0.456679
584	0.0629348	-0.0155499	-0.801225	0.389622		0.183	0.0812078	0.0888039	0.0736117	0.183	-0.442226	-0.428083	-0.456369
585	-0.0725673	-0.220358	-0.739969	0.631484		0.184	0.0815	0.0890959	0.073904	0.184	-0.441893	-0.42775	-0.456037
586	0.063118	1.16655	-0.776908	0.550425		0.185	0.0817645	0.0893601	0.0741689	0.185	-0.441538	-0.427393	-0.455682
587	0.331144	0.934978	-0.545961	0.627171		0.186	0.0820045	0.0895996	0.0744094	0.186	-0.441163	-0.427018	-0.455308
588	0.471993	1.03895	-0.282672	0.45229		0.187	0.0822256	0.08982	0.0746311	0.187	-0.440769	-0.426624	-0.454915
589	0.48659	1.277	-0.747381	-0.161879		0.188	0.0824355	0.0900292	0.0748419	0.188	-0.44036	-0.426215	-0.454506
590	0.183886	0.386269	-0.774434	0.293249		0.189	0.0826434	0.0902362	0.0750506	0.189	-0.439943	-0.425798	-0.454088
591	1.50118	0.988967	-0.43305	0.332972		0.19	0.0828589	0.0904509	0.075267	0.19	-0.439522	-0.425377	-0.453666
592	0.140531	-0.368182	-0.316435	0.292903		0.191	0.0830905	0.0906816	0.0754994	0.191	-0.439107	-0.424964	-0.453251
593	0.255565	-0.3959	-0.368839	0.0870151		0.192	0.0833449	0.0909354	0.0757545	0.192	-0.438705	-0.424562	-0.452848
594	0.250108	-0.355896	-0.40241	0.403493		0.193	0.0836264	0.0912164	0.0760363	0.193	-0.438325	-0.424183	-0.452468
595	0.277434	-0.364873	-0.753463	0.531422		0.194	0.0839362	0.0915261	0.0763463	0.194	-0.437976	-0.423835	-0.452117
596	0.279295	-0.478693	-0.675053	0.341328		0.195	0.0842732	0.0918632	0.0766831	0.195	-0.437665	-0.423524	-0.451805
597	0.0780482	-0.376735	-1.00385	-0.654708		0.196	0.0846338	0.0922244	0.0770432	0.196	-0.437397	-0.423257	-0.451537
598	0.166367	-0.279169	-0.789008	0.154334		0.197	0.0850139	0.0926054	0.0774225	0.197	-0.437174	-0.423035	-0.451313
599	0.254324	-0.342357	-0.241808	-0.0201782		0.198	0.0854096	0.0930022	0.077817	0.198	-0.436993	-0.422855	-0.451132
600	0.24292	-0.199051	-0.112146	0.121212		0.199	0.0858177	0.0934118	0.0782235	0.199	-0.436846	-0.422708	-0.450984
601	0.240744	-0.442664	-0.603525	0.152104		0.2	0.0862371	0.093833	0.0786411	0.2	-0.436726	-0.422588	-0.450863
602	0.142346	-0.446497	-0.854307	0.137459		0.201	0.0866677	0.0942657	0.0790696	0.201	-0.43662	-0.422484	-0.450757
603	0.119898	-0.279929	-0.55061	0.426569		0.202	0.0871104	0.0947107	0.0795101	0.202	-0.43652	-0.422384	-0.450656
604	0.188961	-0.375983	-1.09802	0.254695		0.203	0.0875669	0.0951696	0.0799642	0.203	-0.436412	-0.422277	-0.450547
605	0.00422447	-0.614943	-0.946699	-0.587176		0.204	0.0880383	0.0956434	0.0804331	0.204	-0.436289	-0.422154	-0.450423
606	0.322144	-0.645075	-0.290575	0.398198		0.205	0.0885259	0.0961335	0.0809182	0.205	-0.436143	-0.42201	-0.450276
607	0.11857	-0.366531	-0.386363	0.211978		0.206	0.0890304	0.0966404	0.0814205	0.206	-0.43597	-0.421837	-0.450102
608	0.244741	-0.239095	-0.156002	0.0862575		0.207	0.0895522	0.0971643	0.0819401	0.207	-0.435766	-0.421635	-0.449897
609	0.193575	-0.458904	0.0715725	-0.0129622		0.208	0.0900904	0.0977044	0.0824764	0.208	-0.435531	-0.421402	-0.449661
610	0.269956	-0.435919	-0.790079	0.25604		0.209	0.0906434	0.098259	0.0830278	0.209	-0.435264	-0.421136	-0.449392
611	-0.0316484	-0.397883	-0.331323	0.220796		0.21	0.0912082	0.0988251	0.0835912	0.21	-0.434966	-0.420841	-0.449092
612	0.259008	-0.288454	-0.601431	-0.0944559		0.211	0.0917811	0.0993991	0.0841632	0.211	-0.434639	-0.420516	-0.448762
613	0.071192	-0.316095	-0.478823	-0.0488606		0.212	0.0923584	0.099977	0.0847398	0.212	-0.434287	-0.420166	-0.448408
614	0.35524	-0.41251	-0.271888	0.357635		0.213	0.0929365	0.100556	0.0853175	0.213	-0.433917	-0.419799	-0.448035
615	-0.0535272	-0.433512	0.00894127	0.238237		0.214	0.0935132	0.101132	0.085894	0.214	-0.433531	-0.419416	-0.447647
616	0.0461619	-0.446133	-0.138457	0.273653		0.215	0.094087	0.101706	0.0864678	0.215	-0.433139	-0.419027	-0.447252
617	0.509802	-0.00609235	-0.794765	0.435794		0.216	0.0946569	0.102276	0.0870379	0.216	-0.432746	-0.418636	-0.446856
618	0.482289	-0.0376832	-0.0868128	-0.135569		0.217	0.0952225	0.102841	0.0876037	0.217	-0.432359	-0.418251	-0.446467
619	0.153981	-0.232547	-0.688316	-0.152852		0.218	0.095783	0.103402	0.0881643	0.218	-0.431983	-0.417876	-0.446089
620	0.16736	-0.214204	-0.427619	-0.161296		0.219	0.0963371	0.103956	0.0887185	0.219	-0.43162	-0.417515	-0.445726
621	0.575012	-0.471808	-0.644093	-0.45234		0.22	0.0968831	0.104502	0.0892644	0.22	-0.431277	-0.417171	-0.445382
622	0.0658945	-0.252018	-0.725264	0.30292		0.221	0.0974189	0.105038	0.0897998	0.221	-0.430952	-0.416847	-0.445058
623	0.338414	-0.3225	-0.240944	0.131721		0.222	0.0979423	0.105562	0.0903226	0.222	-0.430646	-0.416539	-0.444752
624	0.34692	-0.28037	-0.223961	0.301969		0.223	0.0984521	0.106073	0.0908316	0.223	-0.430354	-0.416245	-0.444462
625	0.26946	-0.130416	-0.135297	0.416821		0.224	0.0989488	0.10657	0.0913273	0.224	-0.430073	-0.415963	-0.444183
626	0.61221	0.0560447	-0.931001	0.61136		0.225	0.0994344	0.107057	0.0918117	0.225	-0.429793	-0.415681	-0.443906
627	0.206779	0.151864	-0.430711	0.271264		0.226	0.0999124	0.107536	0.0922884	0.226	-0.429511	-0.415396	-0.443625
628	0.256371	0.0509366	-0.24807	0.309049		0.227	0.100388	0.108013	0.0927623	0.227	-0.429219	-0.415102	-0.443336
629	0.147087	-0.400676	-0.595087	0.0281363		0.228	0.100866	0.108493	0.0932391	0.228	-0.428913	-0.414794	-0.443032
630	0.293658	-0.463832	-0.646294	-0.498867		0.229	0.101352	0.108981	0.0937241	0.229	-0.428591	-0.41447	-0.442713
631	0.252118	-0.130083	-0.145256	0.402935		0.23	0.101852	0.109481	0.0942221	0.23	-0.428252	-0.414128	-0.442376
632	0.0809818	-0.406227	-0.732297	-0.43413		0.231	0.102367	0.109997	0.0947361	0.231	-0.427898	-0.413772	-0.442024
633	-0.328874	-0.346652	-0.483652	0.240913		0.232	0.102899	0.11053	0.0952674	0.232	-0.427525	-0.413397	-0.441652
634	-0.0543533	0.0240093	-0.720596	-0.0882261		0.233	0.103448	0.11108	0.0958156	0.233	-0.427135	-0.413006	-0.441264
635	0.124686	-0.202907	-0.947897	0.0517419		0.234	0.104011	0.111643	0.0963784	0.234	-0.426726	-0.412596	-0.440857
636	0.189331	-0.246769	-0.199786	0.635944		0.235	0.104585	0.112217	0.0969521	0.235	-0.426296	-0.412165	-0.440427
637	0.170182	0.614712	-0.0704587	0.64378		0.236	0.105164	0.112797	0.0975319	0.236	-0.425843	-0.411711	-0.439976
638	0.233429	-0.333271	-0.612002	0.132165		0.237	0.105745	0.113377	0.0981124	0.237	-0.425362	-0.411229	-0.439494
639	0.310894	-0.0440582	-1.13914	0.30116		0.238	0.106321	0.113953	0.0986892	0.238	-0.424849	-0.410715	-0.438982
640	-0.116949	-0.323397	-0.320566	0.425208		0.239	0.106891	0.114522	0.099259	0.239	-0.424305	-0.410171	-0.438439
641	0.184986	0.112772	-1.31903	0.47847		0.24	0.107452	0.115084	0.0998202	0.24	-0.423729	-0.409594	-0.437863
642	0.208944	-0.204421	-0.580932	0.223406		0.241	0.108005	0.115636	0.100373	0.241	-0.42312	-0.408985	-0.437256
643	-0.0380596	-0.334626	-1.26525	-0.0640295		0.242	0.10855	0.116183	0.100918	0.242	-0.422484	-0.408348	-0.43662
644	0.0154744	-0.0437304	-1.44898	0.296369		0.243	0.109091	0.116723	0.101458	0.243	-0.421824	-0.407687	-0.435961
645	0.417581	-0.197647	-1.21755	0.179351		0.244	0.109627	0.117261	0.101994	0.244	-0.421144	-0.407006	-0.435281
646	0.093142	-0.111302	-0.273812	0.460398		0.245	0.110163	0.117798	0.102528	0.245	-0.420449	-0.406311	-0.434587
647	0.0101866	-0.102388	-1.8617	-1.35735		0.246	0.110702	0.118338	0.103065	0.246	-0.419746	-0.405606	-0.433885
648	-0.0145418	-0.254136	-0.913106	0.481189		0.247	0.111245	0.118884	0.103607	0.247	-0.419035	-0.404895	-0.433175
649	-0.0370668	-0.460304	-0.688372	0.528414		0.248	0.111798	0.119438	0.104157	0.248	-0.418318	-0.404177	-0.432459
650	-0.0938141	-0.416242	-0.926959	-0.0660778		0.249	0.112362	0.120005	0.10472	0.249	-0.417597	-0.403455	-0.431739
651	-0.0890552	-0.236295	-0.267153	0.505052		0.25	0.112943	0.120588	0.105298	0.25	-0.416869	-0.402726	-0.431012
652	-0.253591	-0.0337586	-0.556535	0.276586		0.251	0.113542	0.121189	0.105896	0.251	-0.416134	-0.40199	-0.430278
653	0.141914	0.0988133	-0.67116	0.374317		0.252	0.114163	0.121812	0.106514	0.252	-0.415389	-0.401244	-0.429534
654	0.0189825	-0.355145	-0.692543	0.225387		0.253	0.114805	0.122456	0.107155	0.253	-0.414637	-0.40049	-0.428783
655	0.0275893	-0.208328	-0.628619	0.273828		0.254	0.115469	0.123121	0.107817	0.254	-0.413877	-0.399729	-0.428024
656	-0.146911	-0.150109	-0.394752	0.126147		0.255	0.116151	0.123804	0.108497	0.255	-0.413114	-0.398964	-0.427263
657	0.700921	0.436629	-0.645488	0.186846		0.256	0.116848	0.124502	0.109194	0.256	-0.412353	-0.398201	-0.426504
658	-0.0505894	-0.0536853	-0.0627101	0.468242		0.257	0.117556	0.125211	0.109901	0.257	-0.411598	-0.397444	-0.425752
659	0.0141886	0.0850978	-0.639888	-0.0432246		0.258	0.118268	0.125923	0.110613	0.258	-0.410855	-0.396698	-0.425012
660	0.685816	0.726561	-0.295791	0.81495		0.259	0.11898	0.126635	0.111324	0.259	-0.410126	-0.395966	-0.424285
661	0.231389	-0.194304	0.31018	0.0671599		0.26	0.119684	0.127339	0.112029	0.26	-0.40941	-0.395248	-0.423573
662	0.0409507	-0.302033	-0.0297852	0.103195		0.261	0.120377	0.128031	0.112722	0.261	-0.408706	-0.394541	-0.422872
663	-0.183955	0.193723	-0.1204	0.151821		0.262	0.121052	0.128706	0.113398	0.262	-0.408008	-0.39384	-0.422176
664	-0.185246	-0.165291	0.0315559	0.544999		0.263	0.121707	0.12936	0.114054	0.263	-0.407306	-0.393136	-0.421476
665	0.126961	-0.237075	0.199822	0.180872		0.264	0.122341	0.129993	0.114688	0.264	-0.406593	-0.392421	-0.420765
666	-0.0564991	-0.130512	-0.294475	0.371332		0.265	0.122955	0.130607	0.115303	0.265	-0.405861	-0.391688	-0.420035
667	0.0697106	-0.308326	0.126989	0.50999		0.266	0.123551	0.131202	0.1159	0.266	-0.405104	-0.39093	-0.419277
668	0.105937	-0.34138	0.0150111	0.0882878		0.267	0.124131	0.131782	0.11648	0.267	-0.404319	-0.390145	-0.418492
669	0.0553958	-0.0427477	-0.156025	-0.0463172		0.268	0.1247	0.13235	0.117049	0.268	-0.403505	-0.389332	-0.417679
670	-0.119655	0.28227	0.0388946	0.264304		0.269	0.125258	0.132909	0.117606	0.269	-0.402669	-0.388496	-0.416842
671	0.0421392	-0.387404	-0.663592	0.315468		0.27	0.125807	0.133459	0.118155	0.27	-0.401818	-0.387646	-0.415991
672	-0.111201	-0.207307	-0.171379	0.476187		0.271	0.12635	0.134003	0.118697	0.271	-0.400961	-0.386789	-0.415133
673	0.0867464	-0.471422	-0.56078	0.59422		0.272	0.126887	0.134541	0.119233	0.272	-0.400104	-0.385932	-0.414276
674	-0.050262	-0.0304669	-0.47557	0.572479		0.273	0.12742	0.135076	0.119764	0.273	-0.399255	-0.385083	-0.413427
675	0.115584	-0.386015	-0.248666	0.595985		0.274	0.127951	0.135609	0.120293	0.274	-0.398418	-0.384245	-0.412591
676	-0.168947	-0.209942	-0.211533	0.289944		0.275	0.128483	0.136143	0.120823	0.275	-0.397596	-0.383422	-0.411771
677	-0.0729968	-0.240906	-0.266534	0.617119		0.276	0.129019	0.136681	0.121357	0.276	-0.396787	-0.382611	-0.410964
678	-0.018489	-0.0840928	-0.609191	0.422446		0.277	0.129563	0.137227	0.121899	0.277	-0.395989	-0.381811	-0.410168
679	0.209577	-0.302016	-0.249444	0.857225		0.278	0.130119	0.137785	0.122452	0.278	-0.3952	-0.381018	-0.409382
680	-0.0144424	-0.211955	-0.552028	0.662837		0.279	0.130689	0.138357	0.123021	0.279	-0.394412	-0.380227	-0.408596
681	0.110829	-0.162455	-0.288227	0.6894		0.28	0.131277	0.138948	0.123607	0.28	-0.393624	-0.379436	-0.407813
682	-0.0943019	-0.264504	-0.772539	0.514929		0.281	0.131885	0.139556	0.124213	0.281	-0.392834	-0.378642	-0.407026
683	0.23339	-0.252164	-0.0201947	-0.106496		0.282	0.132511	0.140184	0.124837	0.282	-0.392039	-0.377844	-0.406235
684	-0.0881754	-0.187022	-0.401014	0.658859		0.283	0.133153	0.140828	0.125479	0.283	-0.391239	-0.37704	-0.405438
685	0.357072	0.138317	-0.102482	0.379935		0.284	0.133808	0.141484	0.126133	0.284	-0.390435	-0.376232	-0.404637
686	-0.100838	-0.0264195	-0.677412	0.303738		0.285	0.134471	0.142147	0.126794	0.285	-0.389626	-0.37542	-0.403831
687	-0.16085	-0.466753	-0.769018	0.219272		0.286	0.135133	0.14281	0.127456	0.286	-0.388812	-0.374603	-0.403021
688	0.0306714	-0.184138	-0.78616	0.667395		0.287	0.135791	0.143468	0.128114	0.287	-0.387991	-0.373779	-0.402203
689	0.0139514	-0.249902	-0.699434	0.610754		0.288	0.13644	0.144117	0.128762	0.288	-0.38716	-0.372945	-0.401375
690	0.54512	0.938356	-0.506658	0.686734		0.289	0.137076	0.144754	0.129399	0.289	-0.386315	-0.372097	-0.400533
691	0.214532	-0.208864	-0.271569	0.767917		0.29	0.137701	0.145378	0.130024	0.29	-0.385451	-0.371231	-0.399672
692	0.138974	-0.061114	-0.793581	0.971763		0.291	0.138314	0.145991	0.130638	0.291	-0.38457	-0.370347	-0.398793
693	-0.223221	-0.135511	-0.986206	0.272462		0.292	0.138918	0.146594	0.131242	0.292	-0.383668	-0.369443	-0.397894
694	0.361517	0.0453424	-0.501209	0.445712		0.293	0.139515	0.147191	0.13184	0.293	-0.38275	-0.368522	-0.396978
695	0.191197	-0.129909	-1.0411	0.38205		0.294	0.140107	0.147782	0.132432	0.294	-0.38182	-0.367589	-0.39605
696	1.0143	1.06592	-0.208717	0.5735		0.295	0.140694	0.148368	0.13302	0.295	-0.380886	-0.366653	-0.395118
697	-0.156682	-0.027409	-0.595548	0.510475		0.296	0.141275	0.148948	0.133601	0.296	-0.379953	-0.365718	-0.394189
698	0.0830289	0.238677	-1.06301	0.69908		0.297	0.141848	0.149521	0.134175	0.297	-0.379032	-0.364794	-0.393269
699	0.0373654	0.203085	-0.778017	0.8388		0.298	0.14241	0.150082	0.134737	0.298	-0.378125	-0.363885	-0.392366
700	0.161977	0.110054	-1.01295	-0.139665		0.299	0.142957	0.15063	0.135284	0.299	-0.377241	-0.362998	-0.391485
701	-0.161848	-0.110378	-0.908658	0.473757		0.3	0.143487	0.151159	0.135814	0.3	-0.37638	-0.362134	-0.390626
702	0.291457	-0.396988	-0.783791	0.410413		0.301	0.143997	0.15167	0.136324	0.301	-0.375544	-0.361295	-0.389793
703	-0.427371	-0.211122	-0.768544	0.783278		0.302	0.144488	0.152162	0.136814	0.302	-0.374731	-0.36048	-0.388982
704	0.151557	0.885299	-0.736306	0.39611		0.303	0.144962	0.152637	0.137287	0.303	-0.373938	-0.359685	-0.388191
705	-0.291949	-0.503947	-0.793744	0.0222675		0.304	0.145424	0.1531	0.137749	0.304	-0.37316	-0.358905	-0.387416
706	-0.222139	-0.466775	-1.34343	0.184698		0.305	0.145881	0.153558	0.138205	0.305	-0.372392	-0.358134	-0.386649
707	-0.10061	-0.40689	-0.448601	0.577833		0.306	0.14634	0.154018	0.138662	0.306	-0.371628	-0.357369	-0.385887
708	0.00350445	-0.269871	-0.789202	0.371481		0.307	0.146807	0.154486	0.139128	0.307	-0.370866	-0.356606	-0.385126
709	0.00983854	-0.159681	-1.03987	-0.0961061		0.308	0.147287	0.154968	0.139607	0.308	-0.370103	-0.355841	-0.384364
710	-0.0297022	-0.24486	-0.975472	0.543869		0.309	0.147786	0.155467	0.140105	0.309	-0.369338	-0.355075	-0.383601
711	0.477041	0.231445	-1.15937	-0.0887145		0.31	0.148304	0.155987	0.140621	0.31	-0.368572	-0.354308	-0.382837
712	-0.244136	-0.28929	-0.85125	0.734248		0.311	0.148841	0.156525	0.141158	0.311	-0.367805	-0.353539	-0.382071
713	0.29073	0.326158	-0.451596	0.744201		0.312	0.149396	0.157081	0.14171	0.312	-0.367036	-0.352768	-0.381303
714	-0.193102	-0.219217	-0.417095	0.806827		0.313	0.149962	0.157649	0.142276	0.313	-0.366264	-0.351994	-0.380533
715	-0.273217	-0.281059	-1.55708	1.15116		0.314	0.150537	0.158225	0.142849	0.314	-0.365487	-0.351215	-0.379759
716	-0.243085	0.0569155	-0.406131	0.800951		0.315	0.151112	0.158802	0.143423	0.315	-0.364703	-0.350429	-0.378978
717	-0.172648	-0.0446038	-1.3028	0.638462		0.316	0.151683	0.159374	0.143992	0.316	-0.363912	-0.349635	-0.378189
718	-0.0291084	-0.283703	-0.838685	1.08097		0.317	0.152242	0.159935	0.14455	0.317	-0.363112	-0.348832	-0.377392
719	0.222432	0.090066	-0.71209	0.650166		0.318	0.152786	0.160481	0.145092	0.318	-0.362305	-0.348022	-0.376588
720	0.0764281	-0.35349	-0.646191	0.871797		0.319	0.15331	0.161007	0.145614	0.319	-0.361493	-0.347208	-0.375779
721	0.242844	-0.0577983	-1.4318	1.01697		0.32	0.153812	0.16151	0.146114	0.32	-0.360682	-0.346393	-0.37497
722	0.204116	0.0922361	-1.24646	0.969582		0.321	0.154291	0.161991	0.146591	0.321	-0.359874	-0.345583	-0.374165
723	-0.224236	0.392777	0.0445129	0.39492		0.322	0.154746	0.162448	0.147045	0.322	-0.359076	-0.344783	-0.373368
724	0.0136399	0.519746	-0.219359	0.961376		0.323	0.155179	0.162882	0.147476	0.323	-0.358289	-0.343994	-0.372583
725	0.0189053	0.588055	-0.33806	0.73256		0.324	0.155592	0.163296	0.147887	0.324	-0.357519	-0.343223	-0.371815
726	0.0625341	0.334051	-0.588089	0.154094		0.325	0.155986	0.163692	0.14828	0.325	-0.356763	-0.342467	-0.37106
727	0.108704	0.481151	-0.463365	0.822267		0.326	0.156365	0.164071	0.148658	0.326	-0.356024	-0.341727	-0.370322
728	0.11681	0.721514	-0.241372	0.683992		0.327	0.156729	0.164437	0.149021	0.327	-0.355301	-0.341003	-0.369598
729	0.0983037	0.50233	-0.543132	0.333771		0.328	0.157083	0.164791	0.149375	0.328	-0.354591	-0.340293	-0.368889
730	0.420467	1.27217	-0.37315	0.751204		0.329	0.157429	0.165138	0.14972	0.329	-0.353895	-0.339597	-0.368193
731	0.487674	1.05768	-0.485362	0.604449		0.33	0.157771	0.16548	0.150062	0.33	-0.353214	-0.338916	-0.367512
732	0.15291	1.06554	-0.125296	0.553112		0.331	0.158113	0.165822	0.150405	0.331	-0.352547	-0.338249	-0.366846
733	0.114233	0.951051	0.0912334	0.387895		0.332	0.15846	0.166168	0.150751	0.332	-0.351897	-0.337598	-0.366196
734	0.51894	0.911353	-0.820117	0.252568		0.333	0.158813	0.166521	0.151104	0.333	-0.351262	-0.336963	-0.365562
735	0.626058	0.961387	-0.221121	0.479171		0.334	0.159176	0.166884	0.151468	0.334	-0.350645	-0.336344	-0.364945
736	0.48204	0.947304	-0.716411	0.400777		0.335	0.159551	0.167259	0.151843	0.335	-0.350044	-0.335742	-0.364345
737	0.356067	0.747224	-0.269817	0.374843		0.336	0.159937	0.167645	0.15223	0.336	-0.349456	-0.335153	-0.363759
738	0.419583	0.784818	-0.730642	-0.0586265		0.337	0.160336	0.168044	0.152628	0.337	-0.348878	-0.334573	-0.363182
739	0.131796	0.581731	-0.690257	1.04031		0.338	0.160744	0.168452	0.153036	0.338	-0.348302	-0.333996	-0.362609
740	0.678357	0.941995	-0.866947	0.855135		0.339	0.161159	0.168867	0.15345	0.339	-0.34772	-0.333412	-0.362028
741	0.404315	0.47128	-1.09358	0.6673		0.34	0.161578	0.169287	0.153869	0.34	-0.34712	-0.332811	-0.36143
742	0.223677	0.54129	-1.15141	0.427995		0.341	0.161997	0.169707	0.154287	0.341	-0.34649	-0.332178	-0.360801
743	0.186417	1.01782	-1.37415	0.465167		0.342	0.162412	0.170123	0.154701	0.342	-0.345819	-0.331506	-0.360132
744	0.403891	0.774265	-1.11545	0.513288		0.343	0.162822	0.170534	0.155109	0.343	-0.3451	-0.330786	-0.359415
745	0.795545	-0.25513	-0.252216	0.325757		0.344	0.163222	0.170937	0.155508	0.344	-0.344332	-0.330016	-0.358647
746	0.0698439	1.04019	-1.43562	-0.52702		0.345	0.163611	0.171328	0.155895	0.345	-0.343515	-0.329198	-0.357831
747	0.319072	1.01516	-0.475981	0.398454		0.346	0.163988	0.171707	0.15627	0.346	-0.342658	-0.32834	-0.356975
748	0.454775	0.942977	-0.936881	0.0299657		0.347	0.164353	0.172074	0.156632	0.347	-0.34177	-0.327453	-0.356088
749	0.683035	0.949185	-0.57999	0.146024		0.348	0.164707	0.17243	0.156983	0.348	-0.340866	-0.326548	-0.355184
750	0.581174	0.887173	-0.536534	0.431682		0.349	0.165051	0.172777	0.157325	0.349	-0.339958	-0.32564	-0.354276
751	0.365285	0.455687	-0.482305	0.75703		0.35	0.16539	0.173118	0.157662	0.35	-0.339057	-0.324739	-0.353375
752	0.284649	0.536758	-0.615832	0.0733731		0.351	0.165727	0.173457	0.157997	0.351	-0.338173	-0.323855	-0.35249
753	0.381201	0.775014	-0.864119	0.533641		0.352	0.166066	0.173797	0.158334	0.352	-0.337311	-0.322994	-0.351628
754	0.0531048	0.696536	-0.558918	0.683259		0.353	0.166411	0.174145	0.158678	0.353	-0.336474	-0.322158	-0.350791
755	-0.14657	0.451538	-0.899214	-0.688305		0.354	0.166765	0.1745	0.159031	0.354	-0.335666	-0.321349	-0.349982
756	0.649854	1.08169	-0.795043	0.480581		0.355	0.167132	0.174867	0.159396	0.355	-0.334883	-0.320567	-0.3492
757	0.239484	0.801308	-0.347019	1.11491		0.356	0.167511	0.175248	0.159774	0.356	-0.334126	-0.31981	-0.348443
758	0.146204	0.616643	-0.900257	0.648174		0.357	0.167903	0.17564	0.160165	0.357	-0.333393	-0.319076	-0.34771
759	-0.00312011	0.701616	-0.769601	1.4016		0.358	0.168305	0.176042	0.160567	0.358	-0.332679	-0.318362	-0.346997
760	0.170156	0.895456	-0.756487	0.851701		0.359	0.168715	0.176453	0.160977	0.359	-0.331984	-0.317665	-0.346303
761	0.356222	0.944498	-1.10438	1.16161		0.36	0.16913	0.176868	0.161391	0.36	-0.331304	-0.316983	-0.345624
762	0.0807295	0.368545	-1.05501	0.749671		0.361	0.169546	0.177285	0.161808	0.361	-0.330637	-0.316315	-0.344959
763	-0.286084	0.527776	-0.955751	0.112545		0.362	0.169961	0.1777	0.162222	0.362	-0.329983	-0.315658	-0.344307
764	-0.138035	0.992068	-1.75627	-0.112217		0.363	0.170371	0.178111	0.162632	0.363	-0.329339	-0.315012	-0.343666
765	1.56191	0.512226	-1.51671	0.917734		0.364	0.170773	0.178513	0.163033	0.364	-0.328704	-0.314374	-0.343033
766	0.149412	0.493	-1.13399	0.87105		0.365	0.171165	0.178905	0.163425	0.365	-0.328073	-0.31374	-0.342405
767	0.68754	0.0737436	-0.65248	0.870411		0.366	0.171546	0.179286	0.163806	0.366	-0.32744	-0.313104	-0.341776
768	0.59464	0.0768622	-1.3608	-0.145796		0.367	0.171916	0.179656	0.164176	0.367	-0.326802	-0.312463	-0.341142
769	0.644471	0.147422	-0.918305	0.436353		0.368	0.172277	0.180017	0.164537	0.368	-0.326156	-0.311813	-0.340499
770	0.466951	0.628448	-1.41397	0.584636		0.369	0.172632	0.180372	0.164892	0.369	-0.325497	-0.311151	-0.339843
771	0.410074	0.253874	-1.18703	-0.410991		0.37	0.172984	0.180724	0.165245	0.37	-0.324828	-0.310478	-0.339178
772	0.802651	0.635441	-0.689664	0.321421		0.371	0.173334	0.181073	0.165595	0.371	-0.324153	-0.309799	-0.338506
773	0.838855	0.742863	-0.812325	0.540734		0.372	0.173683	0.181422	0.165945	0.372	-0.323473	-0.309117	-0.33783
774	0.328315	0.359553	-0.446086	0.624747		0.373	0.17403	0.181768	0.166292	0.373	-0.322797	-0.308437	-0.337156
775	1.35014	1.01159	-0.49329	0.0899073		0.374	0.174374	0.182111	0.166637	0.374	-0.322128	-0.307765	-0.336491
776	0.610027	0.196726	-0.733627	-0.159037		0.375	0.174712	0.182449	0.166975	0.375	-0.321473	-0.307106	-0.335839
777	0.971832	0.086626	-0.474606	0.742465		0.376	0.175039	0.182776	0.167303	0.376	-0.320833	-0.306463	-0.335202
778	0.903564	0.586278	-0.661317	0.279818		0.377	0.175355	0.183092	0.167619	0.377	-0.320209	-0.305836	-0.334582
779	0.545798	0.348425	-0.219578	0.855578		0.378	0.175657	0.183393	0.167921	0.378	-0.319602	-0.305227	-0.333978
780	0.582349	-0.122661	-1.16419	0.735445		0.379	0.175945	0.183681	0.168208	0.379	-0.319012	-0.304633	-0.333391
781	0.641561	0.390119	-0.677982	0.480786		0.38	0.176219	0.183956	0.168482	0.38	-0.318437	-0.304055	-0.332819
782	0.277215	0.0213344	-1.53557	-0.119414		0.381	0.176483	0.184221	0.168746	0.381	-0.317878	-0.303494	-0.332263
783	0.425478	0.0384516	-0.741984	0.607456		0.382	0.176741	0.184479	0.169003	0.382	-0.317336	-0.302949	-0.331723
784	0.671936	-0.044759	-1.25447	0.111713		0.383	0.176998	0.184738	0.169259	0.383	-0.316813	-0.302424	-0.331203
785	0.56384	0.123927	-1.38667	-0.840788		0.384	0.17726	0.185001	0.169519	0.384	-0.316311	-0.301919	-0.330703
786	0.486108	0.00803108	-1.16478	0.339582		0.385	0.17753	0.185273	0.169788	0.385	-0.315835	-0.301441	-0.330229
787	-0.297735	-0.369083	-0.792214	0.714699		0.386	0.177815	0.185559	0.17007	0.386	-0.315385	-0.30099	-0.329781
788	-0.19393	-0.59162	-0.465194	0.816586		0.387	0.178115	0.185861	0.170368	0.387	-0.314963	-0.300566	-0.329361
789	-0.170145	-0.341485	-0.650649	0.873312		0.388	0.17843	0.186179	0.170681	0.388	-0.314568	-0.300169	-0.328966
790	-0.0151358	-0.513199	-1.15828	0.504113		0.389	0.17876	0.186511	0.171008	0.389	-0.314195	-0.299795	-0.328594
791	-0.224465	-0.492353	-0.620049	0.420427		0.39	0.179101	0.186855	0.171347	0.39	-0.313836	-0.299436	-0.328236
792	-0.227871	-0.289685	-0.698913	0.867423		0.391	0.17945	0.187206	0.171694	0.391	-0.313484	-0.299083	-0.327885
793	-0.216704	-0.684896	-0.975633	0.740944		0.392	0.179802	0.18756	0.172045	0.392	-0.313127	-0.298726	-0.327528
794	-0.233863	-0.676745	-1.18453	0.232294		0.393	0.180154	0.187914	0.172395	0.393	-0.312753	-0.298352	-0.327155
795	0.255531	0.171621	-1.20295	0.00397849		0.394	0.180504	0.188265	0.172744	0.394	-0.312351	-0.29795	-0.326753
796	-0.125681	-0.406607	-0.570812	0.730776		0.395	0.180848	0.18861	0.173087	0.395	-0.311918	-0.297515	-0.326321
797	0.2683	-0.180376	-0.719277	0.995444		0.396	0.181184	0.188947	0.173422	0.396	-0.311445	-0.297041	-0.325849
798	0.171018	-0.303735	-1.19409	0.672043		0.397	0.181511	0.189274	0.173748	0.397	-0.310934	-0.296529	-0.325339
799	0.158674	0.658279	-0.589593	0.831281		0.398	0.181825	0.189589	0.174062	0.398	-0.310386	-0.295979	-0.324793
800	-0.166091	-0.17094	-0.727988	1.00223		0.399	0.182127	0.189891	0.174363	0.399	-0.309809	-0.2954	-0.324218
801	0.0937526	-0.085861	-0.969829	0.631944		0.4	0.182416	0.19018	0.174652	0.4	-0.309206	-0.294795	-0.323616
802	-0.106568	-0.268877	-0.855946	0.860249		0.401	0.182692	0.190457	0.174928	0.401	-0.308583	-0.29417	-0.322996
803	-0.100191	-0.254805	-0.153009	0.461181		0.402	0.182957	0.190723	0.175192	0.402	-0.307949	-0.293534	-0.322364
804	-0.231293	-0.505748	-0.76314	0.793845		0.403	0.183212	0.190978	0.175446	0.403	-0.307309	-0.292892	-0.321726
805	-0.0193209	-0.081642	-1.48784	0.788148		0.404	0.183459	0.191226	0.175693	0.404	-0.306667	-0.292248	-0.321086
806	0.177466	-0.474008	-0.771116	0.768356		0.405	0.183701	0.191468	0.175933	0.405	-0.306028	-0.291607	-0.320449
807	0.0322553	-0.24028	-0.672948	1.03392		0.406	0.183938	0.191707	0.17617	0.406	-0.305394	-0.290972	-0.319817
808	-0.0237428	-0.287246	-1.00845	1.07876		0.407	0.184174	0.191943	0.176405	0.407	-0.304766	-0.290342	-0.319191
809	0.106528	0.355285	-1.12642	0.288409		0.408	0.184409	0.192179	0.176639	0.408	-0.304142	-0.289716	-0.318568
810	-0.113098	-0.0026147	-1.00572	0.481155		0.409	0.184646	0.192416	0.176875	0.409	-0.303523	-0.289095	-0.317951
811	-0.000165368	-0.312283	-1.61191	-0.290439		0.41	0.184885	0.192656	0.177114	0.41	-0.302907	-0.288477	-0.317336
812	0.0723775	-0.0875698	-1.0334	0.893468		0.411	0.185126	0.192897	0.177355	0.411	-0.302293	-0.287861	-0.316725
813	-0.00854541	0.237047	-1.20493	1.11087		0.412	0.185371	0.193142	0.177599	0.412	-0.301682	-0.287247	-0.316116
814	0.234878	0.176331	-0.953241	0.744442		0.413	0.185618	0.19339	0.177846	0.413	-0.301076	-0.286638	-0.315513
815	-0.282632	-0.14243	-0.890665	0.119591		0.414	0.185868	0.193641	0.178096	0.414	-0.300477	-0.286036	-0.314917
816	-0.218192	0.191655	-0.788136	0.537079		0.415	0.186122	0.193894	0.178349	0.415	-0.299885	-0.285441	-0.31433
817	0.0202236	-0.118555	-1.61702	-0.237865		0.416	0.186378	0.194151	0.178605	0.416	-0.299302	-0.284853	-0.313751
818	0.23169	0.222837	-0.738341	0.645388		0.417	0.186638	0.194411	0.178865	0.417	-0.298726	-0.284273	-0.31318
819	0.112734	-0.158885	-1.48337	0.615299		0.418	0.186903	0.194677	0.17913	0.418	-0.298156	-0.283697	-0.312614
820	0.00944057	-0.0795307	-1.71339	0.650234		0.419	0.187173	0.194948	0.179399	0.419	-0.297591	-0.283127	-0.312054
821	0.0918811	0.0594244	-0.879077	0.557583		0.42	0.187449	0.195224	0.179674	0.42	-0.29703	-0.282561	-0.311499
822	-0.333955	0.154949	-0.343028	0.774139		0.421	0.187729	0.195506	0.179953	0.421	-0.296473	-0.281999	-0.310947
823	-0.073725	0.420259	-0.93082	0.552443		0.422	0.188013	0.19579	0.180235	0.422	-0.295925	-0.281446	-0.310404
824	-0.0315995	0.671602	-0.909915	0.683206		0.423	0.188296	0.196075	0.180516	0.423	-0.295389	-0.280905	-0.309873
825	0.226142	-0.248918	-1.5504	-0.113636		0.424	0.188576	0.196357	0.180795	0.424	-0.294871	-0.280383	-0.309359
826	-0.0666338	-0.02937	-1.19493	1.11183		0.425	0.188849	0.196633	0.181065	0.425	-0.294378	-0.279885	-0.30887
827	-0.0606022	-0.0219349	-0.843731	0.622649		0.426	0.189111	0.196897	0.181325	0.426	-0.293913	-0.279417	-0.308409
828	0.144184	-0.271665	-1.07876	0.731967		0.427	0.189358	0.197146	0.181569	0.427	-0.293479	-0.278978	-0.307979
829	-0.121036	0.290779	-1.91361	-0.355496		0.428	0.189587	0.197378	0.181795	0.428	-0.293074	-0.278569	-0.307578
830	-0.0802292	-0.0751991	-0.984797	0.417889		0.429	0.189796	0.19759	0.182002	0.429	-0.292695	-0.278186	-0.307204
831	-0.364411	-0.132071	-0.51945	0.552477		0.43	0.189985	0.197781	0.182188	0.43	-0.292333	-0.277819	-0.306846
832	0.0998063	0.0372264	-0.168811	0.200133		0.431	0.190154	0.197953	0.182355	0.431	-0.291978	-0.277459	-0.306497
833	-0.255066	-0.0672064	-0.842296	0.300808		0.432	0.190307	0.198108	0.182506	0.432	-0.29162	-0.277096	-0.306144
834	0.155252	0.80991	-0.218681	0.680746		0.433	0.190446	0.19825	0.182643	0.433	-0.291248	-0.276718	-0.305778
835	-0.0110782	-0.104785	-0.377622	0.274752		0.434	0.190576	0.198381	0.182771	0.434	-0.290853	-0.276316	-0.305389
836	-0.1533	0.271735	-0.142392	0.456776		0.435	0.190701	0.198507	0.182894	0.435	-0.290428	-0.275885	-0.304971
837	0.0172446	-0.00307477	-0.318584	0.588619		0.436	0.190823	0.198631	0.183015	0.436	-0.289969	-0.275419	-0.30452
838	0.0308347	0.441714	-0.64826	0.286871		0.437	0.190945	0.198754	0.183137	0.437	-0.289474	-0.274917	-0.304032
839	0.0653222	0.312678	-0.33457	0.388608		0.438	0.191071	0.19888	0.183261	0.438	-0.288943	-0.274378	-0.303508
840	-0.470091	-0.382772	-0.591979	0.335539		0.439	0.1912	0.19901	0.183391	0.439	-0.288376	-0.273804	-0.302949
841	-0.134054	0.26342	-0.499527	0.238169		0.44	0.191337	0.199147	0.183527	0.44	-0.28778	-0.2732	-0.30236
842	-0.360597	0.0302354	-0.321345	0.0899168		0.441	0.191482	0.199292	0.183673	0.441	-0.287157	-0.27257	-0.301745
843	-0.0340192	0.154634	-0.769229	0.678015		0.442	0.191639	0.199449	0.18383	0.442	-0.286517	-0.271922	-0.301112
844	-0.0217322	0.196185	-0.818341	0.303553		0.443	0.191811	0.199621	0.184002	0.443	-0.285864	-0.271262	-0.300466
845	-0.302236	0.0935349	-0.699554	0.553971		0.444	0.192002	0.199812	0.184193	0.444	-0.285205	-0.270597	-0.299814
846	-0.240031	0.138154	-0.795405	0.525959		0.445	0.192216	0.200026	0.184407	0.445	-0.284551	-0.269936	-0.299166
847	-0.135024	-0.120627	-0.854315	-0.315915		0.446	0.192456	0.200266	0.184647	0.446	-0.283909	-0.269288	-0.29853
848	0.00569326	0.325458	-0.582185	0.648479		0.447	0.192724	0.200534	0.184914	0.447	-0.283289	-0.268663	-0.297915
849	-0.253924	0.206081	-0.593395	0.899612		0.448	0.193019	0.200829	0.185208	0.448	-0.282698	-0.268067	-0.297329
850	0.119452	0.445271	-0.585644	0.674229		0.449	0.193336	0.201147	0.185525	0.449	-0.282144	-0.267509	-0.296778
851	0.15821	0.488852	-0.427461	0.592144		0.45	0.193673	0.201485	0.18586	0.45	-0.281633	-0.266996	-0.296271
852	-0.354039	0.363223	-0.925165	0.528143		0.451	0.194021	0.201835	0.186207	0.451	-0.281169	-0.266529	-0.295809
853	0.33694	0.185928	-0.362945	0.412026		0.452	0.194374	0.202189	0.186558	0.452	-0.280754	-0.266112	-0.295395
854	1.41424	0.774019	-0.444468	0.63603		0.453	0.194723	0.202541	0.186906	0.453	-0.280384	-0.265742	-0.295026
855	0.190267	0.0544417	-0.639673	0.603845		0.454	0.195064	0.202883	0.187244	0.454	-0.280053	-0.26541	-0.294695
856	0.0953504	1.23218	-1.07066	0.303495		0.455	0.195389	0.203211	0.187566	0.455	-0.279751	-0.265109	-0.294393
857	-0.0181204	0.423468	-0.758518	0.70578		0.456	0.195694	0.203519	0.187869	0.456	-0.279468	-0.264827	-0.294109
858	0.816862	0.9314	-0.691588	0.442219		0.457	0.195979	0.203807	0.188151	0.457	-0.279192	-0.264552	-0.293831
859	0.548665	0.639684	-0.610726	0.446021		0.458	0.196242	0.204072	0.188411	0.458	-0.278911	-0.264273	-0.29355
860	0.17549	0.80804	-0.736792	0.563368		0.459	0.196483	0.204316	0.188649	0.459	-0.278617	-0.263981	-0.293254
861	0.43428	1.16102	-0.652071	0.518085		0.46	0.196704	0.20454	0.188867	0.46	-0.278303	-0.263667	-0.292938
862	0.629248	0.610995	-1.37629	0.466689		0.461	0.196906	0.204746	0.189067	0.461	-0.277964	-0.26333	-0.292598
863	0.58587	1.56703	-0.634287	0.510284		0.462	0.197092	0.204935	0.18925	0.462	-0.277598	-0.262965	-0.29223
864	1.44242	1.56038	-0.691807	0.269982		0.463	0.197264	0.205108	0.189419	0.463	-0.277204	-0.262572	-0.291835
865	-0.0238886	-0.176735	-0.586587	0.776699		0.464	0.197421	0.205268	0.189574	0.464	-0.276785	-0.262154	-0.291416
866	-0.179284	-0.234361	-0.678599	0.537797		0.465	0.197565	0.205414	0.189716	0.465	-0.276343	-0.261712	-0.290975
867	-0.211645	-0.477286	-1.28445	0.413592		0.466	0.197698	0.205549	0.189847	0.466	-0.275882	-0.26125	-0.290514
868	-0.15062	-0.177414	-1.02087	0.886761		0.467	0.19782	0.205672	0.189968	0.467	-0.275406	-0.260773	-0.290039
869	0.0106586	0.219305	-0.4539	0.538047		0.468	0.197934	0.205788	0.19008	0.468	-0.274921	-0.260286	-0.289555
870	-0.551645	-0.355959	-1.59569	1.10153		0.469	0.198041	0.205896	0.190186	0.469	-0.27443	-0.259793	-0.289068
871	0.0432243	0.18412	-1.36355	0.957631		0.47	0.198144	0.206	0.190287	0.47	-0.27394	-0.2593	-0.288581
872	0.185321	-0.117521	-0.814949	0.662499		0.471	0.198245	0.206102	0.190387	0.471	-0.273455	-0.258811	-0.288099
873	-0.29158	-0.486724	-0.781093	0.974286		0.472	0.198346	0.206204	0.190487	0.472	-0.272979	-0.25833	-0.287627
874	-0.0965264	0.0523917	-0.592132	0.900816		0.473	0.198449	0.206309	0.190589	0.473	-0.272517	-0.257863	-0.287171
875	-0.267444	-0.234808	-0.661978	0.377783		0.474	0.198556	0.206417	0.190695	0.474	-0.272076	-0.257417	-0.286735
876	-0.150056	-0.165715	-0.647619	0.437988		0.475	0.198669	0.206531	0.190806	0.475	-0.271661	-0.256996	-0.286326
877	0.0667885	-0.305184	-0.57592	0.702994		0.476	0.198789	0.206652	0.190925	0.476	-0.271279	-0.256608	-0.28595
878	0.270759	-0.330247	-0.724916	0.341788		0.477	0.198918	0.206783	0.191053	0.477	-0.270931	-0.256254	-0.285607
879	0.105108	-0.223996	-1.08598	0.230922		0.478	0.199056	0.206922	0.19119	0.478	-0.270618	-0.255936	-0.285301
880	-0.180439	0.173957	-1.14155	0.427363		0.479	0.199203	0.207071	0.191336	0.479	-0.270337	-0.25565	-0.285025
881	-0.127566	-0.212068	-0.968818	0.617224		0.48	0.19936	0.207228	0.191491	0.48	-0.270082	-0.25539	-0.284775
882	-0.116438	0.108298	-1.17816	0.118938		0.481	0.199523	0.207393	0.191653	0.481	-0.269842	-0.255146	-0.284538
883	-0.172111	-0.0873565	-0.983347	0.335313		0.482	0.199692	0.207563	0.191822	0.482	-0.269606	-0.254906	-0.284306
884	-0.2544	0.115594	-0.776688	0.901531		0.483	0.199867	0.207738	0.191995	0.483	-0.269362	-0.254658	-0.284065
885	-0.132303	-0.184763	-0.749816	0.370955		0.484	0.200044	0.207916	0.192171	0.484	-0.269101	-0.254395	-0.283808
886	0.174733	0.0717414	-0.766911	0.532087		0.485	0.200222	0.208095	0.192349	0.485	-0.268817	-0.254108	-0.283526
887	-0.20072	-0.303624	-1.0708	0.606981		0.486	0.2004	0.208273	0.192526	0.486	-0.268508	-0.253796	-0.283219
888	-0.126876	-0.0882396	-0.701177	0.755393		0.487	0.200575	0.20845	0.192701	0.487	-0.268173	-0.253459	-0.282887
889	0.0644838	0.118656	-0.86533	0.867825		0.488	0.200748	0.208622	0.192873	0.488	-0.267814	-0.253098	-0.28253
890	0.105845	0.428199	-0.799275	0.821209		0.489	0.200914	0.208789	0.19304	0.489	-0.267438	-0.25272	-0.282157
891	-0.0608349	0.313882	-0.743051	0.940684		0.49	0.201075	0.20895	0.193199	0.49	-0.267049	-0.252328	-0.28177
892	-0.349624	-0.152987	-1.32487	0.874423		0.491	0.201227	0.209102	0.193351	0.491	-0.266653	-0.251929	-0.281377
893	0.0882609	0.397905	-0.80605	0.771678		0.492	0.201368	0.209244	0.193492	0.492	-0.266257	-0.25153	-0.280983
894	0.0920491	-0.341024	-0.559459	0.344355		0.493	0.201498	0.209374	0.193621	0.493	-0.265863	-0.251134	-0.280593
895	0.253592	0.614831	-0.801397	0.627236		0.494	0.201614	0.209491	0.193736	0.494	-0.265476	-0.250743	-0.280209
896	-0.0917286	0.0440897	-0.596845	0.813403		0.495	0.201717	0.209595	0.193839	0.495	-0.265097	-0.250361	-0.279833
897	-0.458131	-0.121323	-0.799607	0.675987		0.496	0.201808	0.209687	0.193929	0.496	-0.264728	-0.249988	-0.279468
898	-0.113887	0.273734	-1.3007	0.0692242		0.497	0.201888	0.209767	0.194008	0.497	-0.264369	-0.249625	-0.279113
899	-0.11283	-0.035773	-0.696119	0.858498		0.498	0.201959	0.20984	0.194078	0.498	-0.264019	-0.24927	-0.278767
900	0.218848	0.600605	-0.378058	0.0233391		0.499	0.202023	0.209905	0.194141	0.499	-0.263679	-0.248926	-0.278433
901	-0.285036	0.175158	-0.22274	0.191691		0.5	0.202082	0.209965	0.194199	0.5	-0.263354	-0.248595	-0.278113
902	-0.204615	0.203757	-0.280334	-0.0185452		0.501	0.202137	0.210022	0.194253	0.501	-0.263043	-0.248279	-0.277807
903	0.209686	0.445185	-0.409104	0.106693		0.502	0.202188	0.210074	0.194302	0.502	-0.262751	-0.247982	-0.277521
904	-0.40579	0.266914	-0.0633407	-0.162405		0.503	0.202233	0.21012	0.194347	0.503	-0.26248	-0.247706	-0.277255
905	-0.0772751	0.415877	-0.419658	-0.291174		0.504	0.202274	0.210162	0.194387	0.504	-0.262232	-0.247453	-0.277012
906	-0.036597	-0.00362595	-0.452125	-0.00322375		0.505	0.202309	0.210198	0.19442	0.505	-0.262009	-0.247224	-0.276793
907	-0.241894	0.213314	-0.402536	-0.128462		0.506	0.202339	0.210229	0.194449	0.506	-0.261804	-0.247015	-0.276593
908	-0.128447	-0.20522	-0.539462	-0.0922862		0.507	0.202363	0.210254	0.194472	0.507	-0.261613	-0.24682	-0.276405
909	-0.0431	0.0646404	-0.386488	-0.122192		0.508	0.202383	0.210275	0.194491	0.508	-0.261429	-0.246634	-0.276225
910	0.195404	0.501923	-0.665973	0.175071		0.509	0.2024	0.210293	0.194508	0.509	-0.261248	-0.24645	-0.276046
911	-0.294373	-0.150492	-0.467669	0.0862931		0.51	0.202416	0.210309	0.194522	0.51	-0.261063	-0.246262	-0.275863
912	-0.271783	-0.0175494	-0.362415	0.227935		0.511	0.202431	0.210325	0.194537	0.511	-0.260872	-0.246069	-0.275674
913	0.0223598	0.351201	-0.231721	-0.0171457		0.512	0.202448	0.210343	0.194552	0.512	-0.260673	-0.245869	-0.275477
914	-0.0981662	0.0718098	-0.294215	0.373819		0.513	0.202466	0.210363	0.19457	0.513	-0.260469	-0.245664	-0.275274
915	-0.000566185	0.136737	-0.339008	0.0292916		0.514	0.202487	0.210385	0.19459	0.514	-0.26026	-0.245454	-0.275066
916	-0.216123	-0.14177	-0.681453	0.0817063		0.515	0.20251	0.210409	0.194612	0.515	-0.260049	-0.245243	-0.274856
917	-0.0814407	-0.0847412	-0.558093	0.12275		0.516	0.202534	0.210434	0.194634	0.516	-0.25984	-0.245032	-0.274647
918	-0.0376917	0.221537	-0.527231	0.39718		0.517	0.202556	0.210457	0.194655	0.517	-0.259633	-0.244825	-0.27444
919	0.177091	0.346521	-0.231086	0.228261		0.518	0.202576	0.210479	0.194674	0.518	-0.25943	-0.244622	-0.274238
920	-0.0740725	0.0245168	-0.965052	0.136274		0.519	0.202592	0.210497	0.194688	0.519	-0.259234	-0.244426	-0.274042
921	0.0688156	-0.00278709	-0.524114	0.569458		0.52	0.202605	0.21051	0.194699	0.52	-0.259042	-0.244234	-0.273851
922	-0.131499	0.305828	-0.652082	0.218651		0.521	0.202614	0.210521	0.194707	0.521	-0.258852	-0.244044	-0.273661
923	-0.106001	0.0983347	-1.33859	0.250321		0.522	0.202625	0.210533	0.194716	0.522	-0.258664	-0.243856	-0.273471
924	-0.0878682	0.266204	-0.779158	0.353744		0.523	0.202641	0.210551	0.194731	0.523	-0.258473	-0.243666	-0.27328
925	0.123617	0.0147533	-0.768875	0.731419		0.524	0.202666	0.210577	0.194755	0.524	-0.258281	-0.243475	-0.273088
926	-0.403094	0.112109	-0.535668	0.616418		0.525	0.202705	0.210616	0.194793	0.525	-0.258089	-0.243284	-0.272894
927	0.00780792	0.206741	-0.915661	0.246831		0.526	0.202759	0.210671	0.194846	0.526	-0.257898	-0.243093	-0.272702
928	0.0032057	0.0553425	-0.684781	0.788939		0.527	0.202828	0.210741	0.194915	0.527	-0.257712	-0.242909	-0.272516
929	-0.0727369	0.0138273	-1.37168	0.941293		0.528	0.202912	0.210825	0.194998	0.528	-0.257536	-0.242733	-0.272339
930	-0.0492077	0.104938	-0.693153	0.382371		0.529	0.203005	0.210919	0.195091	0.529	-0.257372	-0.24257	-0.272174
931	-0.344008	0.530368	-0.940534	0.482426		0.53	0.203104	0.211018	0.19519	0.53	-0.257221	-0.242419	-0.272022
932	-0.106222	0.555638	-0.472722	0.530825		0.531	0.203201	0.211115	0.195287	0.531	-0.257081	-0.24228	-0.271882
933	-0.0563449	0.272006	-0.841068	0.639068		0.532	0.203288	0.211201	0.195374	0.532	-0.256951	-0.242149	-0.271752
934	-0.98576	1.17242	-0.587978	0.484785		0.533	0.203358	0.211271	0.195445	0.533	-0.256823	-0.242021	-0.271625
935	0.411742	1.17024	-0.943615	0.442318		0.534	0.203407	0.211319	0.195494	0.534	-0.256691	-0.241889	-0.271494
936	-0.243235	0.813489	-0.734062	0.638531		0.535	0.20343	0.211342	0.195518	0.535	-0.256551	-0.241748	-0.271354
937	1.1083	1.96191	-0.579043	0.539141		0.536	0.203426	0.211337	0.195515	0.536	-0.256395	-0.241592	-0.271199
938	0.20962	1.04027	-0.734657	0.693987		0.537	0.203396	0.211307	0.195486	0.537	-0.256224	-0.241419	-0.271028
939	1.30111	1.09577	-0.856959	0.671113		0.538	0.203341	0.211251	0.195431	0.538	-0.256036	-0.241231	-0.270842
940	0.738731	-0.191516	-1.20397	0.909603		0.539	0.203263	0.211173	0.195354	0.539	-0.255834	-0.241029	-0.27064
941	1.36486	0.789181	-0.967196	1.05299		0.54	0.203165	0.211074	0.195256	0.54	-0.255622	-0.240817	-0.270428
942	1.52635	0.873499	-1.38587	0.656555		0.541	0.20305	0.210959	0.195141	0.541	-0.255405	-0.2406	-0.27021
943	1.43933	1.08023	-1.18365	0.363504		0.542	0.20292	0.21083	0.195011	0.542	-0.255189	-0.240384	-0.269993
944	0.740791	1.07139	-1.00984	0.792527		0.543	0.202779	0.210688	0.194869	0.543	-0.254977	-0.240173	-0.26978
945	1.41633	0.710447	-1.50234	0.609493		0.544	0.202626	0.210537	0.194716	0.544	-0.254773	-0.239971	-0.269576
946	0.781826	1.21669	-0.741691	0.585014		0.545	0.202467	0.210378	0.194555	0.545	-0.25458	-0.23978	-0.26938
947	1.23866	1.41365	-1.31057	0.192049		0.546	0.202303	0.210216	0.19439	0.546	-0.254398	-0.2396	-0.269196
948	0.263226	-0.175549	-0.656731	0.973387		0.547	0.202139	0.210054	0.194224	0.547	-0.254226	-0.23943	-0.269021
949	0.137403	0.182819	-0.837309	0.553652		0.548	0.201979	0.209896	0.194062	0.548	-0.254065	-0.239272	-0.268858
950	0.173963	0.182225	-1.05381	0.648951		0.549	0.201828	0.209746	0.193909	0.549	-0.253912	-0.239121	-0.268703
951	0.118069	0.33992	-0.968099	0.806084		0.55	0.201689	0.209609	0.193768	0.55	-0.253766	-0.238977	-0.268555
952	0.397037	0.0963981	-0.816884	0.990709		0.551	0.201565	0.209487	0.193642	0.551	-0.253624	-0.238837	-0.268411
953	0.244277	0.0648221	-0.873176	0.980693		0.552	0.201458	0.209382	0.193534	0.552	-0.253483	-0.238698	-0.268269
954	0.111597	0.398312	-0.770942	0.95251		0.553	0.201367	0.209292	0.193441	0.553	-0.253341	-0.238556	-0.268125
955	0.0876024	0.368907	-0.946481	1.16422		0.554	0.201292	0.209219	0.193366	0.554	-0.253192	-0.238408	-0.267976
956	0.129073	0.71006	-1.29982	1.17933		0.555	0.201232	0.209159	0.193304	0.555	-0.253036	-0.238252	-0.26782
957	0.253829	0.401053	-1.01347	1.10743		0.556	0.201181	0.20911	0.193253	0.556	-0.252867	-0.238083	-0.267651
958	0.115997	0.733147	-0.271516	0.0766558		0.557	0.201138	0.209066	0.19321	0.557	-0.252683	-0.237899	-0.267467
959	-0.289541	0.311967	-0.273601	0.0262503		0.558	0.201098	0.209026	0.19317	0.558	-0.252478	-0.237693	-0.267262
960	0.0841317	-0.293521	-0.310781	0.213111		0.559	0.201057	0.208984	0.193129	0.559	-0.252249	-0.237464	-0.267034
961	-0.165773	-0.387084	-0.417987	0.077267		0.56	0.201012	0.208938	0.193085	0.56	-0.251997	-0.237211	-0.266782
962	-0.203697	-0.351986	-0.181235	-0.100574		0.561	0.200959	0.208885	0.193033	0.561	-0.25172	-0.236934	-0.266505
963	0.00846571	0.04364	-0.427209	-0.193672		0.562	0.200896	0.208821	0.192972	0.562	-0.251424	-0.236638	-0.266209
964	0.125214	-0.102376	-0.313959	-0.174631		0.563	0.200822	0.208746	0.192898	0.563	-0.251116	-0.23633	-0.265901
965	0.0365143	0.365963	-0.197921	0.0353185		0.564	0.200734	0.208657	0.192811	0.564	-0.250805	-0.23602	-0.26559
966	0.0012417	0.264531	-0.0821821	-0.0213264		0.565	0.200632	0.208554	0.192709	0.565	-0.250504	-0.23572	-0.265288
967	-0.247718	-0.180049	-0.246611	-0.181689		0.566	0.200516	0.208438	0.192593	0.566	-0.250224	-0.235442	-0.265005
968	0.00869473	0.424614	-0.257927	-0.0690129		0.567	0.200386	0.208309	0.192464	0.567	-0.249974	-0.235194	-0.264753
969	0.47463	0.377076	-0.160204	0.181969		0.568	0.200247	0.208169	0.192325	0.568	-0.249761	-0.234984	-0.264537
970	0.044392	0.298195	-0.262133	0.0498788		0.569	0.200099	0.208022	0.192177	0.569	-0.249588	-0.234815	-0.264361
971	0.408362	0.215345	-0.293392	0.257382		0.57	0.199946	0.20787	0.192023	0.57	-0.249455	-0.234686	-0.264223
972	0.015392	0.228569	-0.43255	-0.399518		0.571	0.199791	0.207715	0.191867	0.571	-0.249359	-0.234595	-0.264124
973	-0.0880006	0.020106	-0.492282	-0.0172772		0.572	0.199638	0.207563	0.191713	0.572	-0.249297	-0.234536	-0.264057
974	-0.033084	0.00470318	-0.532124	0.109604		0.573	0.199489	0.207415	0.191563	0.573	-0.249263	-0.234507	-0.264019
975	0.027408	0.0981927	-0.250286	-0.0078328		0.574	0.199348	0.207275	0.191422	0.574	-0.249255	-0.234502	-0.264007
976	-0.025806	-0.232773	-0.68048	-1.09135		0.575	0.199218	0.207145	0.191291	0.575	-0.249267	-0.234518	-0.264016
977	0.0334201	-0.21305	-0.585072	-0.0521149		0.576	0.1991	0.207027	0.191173	0.576	-0.249299	-0.234552	-0.264045
978	0.101523	0.0592032	-0.907022	-0.372992		0.577	0.198993	0.206921	0.191065	0.577	-0.249347	-0.234602	-0.264093
979	0.138158	0.00435495	-0.985401	-0.778876		0.578	0.198895	0.206822	0.190967	0.578	-0.249411	-0.234666	-0.264157
980	0.116799	-0.227697	-0.881593	-0.151251		0.579	0.198802	0.206729	0.190874	0.579	-0.249489	-0.234743	-0.264235
981	0.737232	0.320314	-0.496924	-0.209451		0.58	0.19871	0.206637	0.190783	0.58	-0.249579	-0.234831	-0.264327
982	-0.0205405	-0.334254	-0.582146	0.0676039		0.581	0.198613	0.20654	0.190686	0.581	-0.249677	-0.234926	-0.264428
983	0.42822	0.261386	-0.426731	-0.0130415		0.582	0.198508	0.206434	0.190581	0.582	-0.249778	-0.235024	-0.264531
984	0.130599	0.223727	-0.566856	0.0278224		0.583	0.198389	0.206314	0.190463	0.583	-0.249876	-0.235119	-0.264634
985	-0.110454	0.196939	-0.215701	0.0939903		0.584	0.198256	0.206181	0.190331	0.584	-0.249964	-0.235202	-0.264725
986	0.00539957	0.272092	-0.263625	0.169482		0.585	0.198107	0.206032	0.190183	0.585	-0.250034	-0.235269	-0.2648
987	-0.278663	0.031183	-0.661549	-1.0821		0.586	0.197946	0.205871	0.190021	0.586	-0.250079	-0.23531	-0.264848
988	-0.196072	-0.0512408	-0.545858	-0.158886		0.587	0.197776	0.205702	0.189851	0.587	-0.250094	-0.235321	-0.264866
989	0.111267	0.40399	-0.991481	-0.0968552		0.588	0.197601	0.205527	0.189675	0.588	-0.250077	-0.235301	-0.264853
990	0.129778	0.226644	-0.178217	0.123433		0.589	0.197425	0.205352	0.189498	0.589	-0.250031	-0.235252	-0.264809
991	-0.127515	0.243102	-1.05252	-0.118516		0.59	0.197253	0.205182	0.189324	0.59	-0.249959	-0.235179	-0.264739
992	-0.137735	-0.0050714	-1.04514	-0.248995		0.591	0.19709	0.205021	0.18916	0.591	-0.249869	-0.235088	-0.26465
993	-0.234232	0.291485	-0.730538	-1.60416		0.592	0.19694	0.204873	0.189007	0.592	-0.249769	-0.234988	-0.26455
994	0.377335	0.393197	-0.892133	-0.321015		0.593	0.196804	0.204739	0.188868	0.593	-0.249668	-0.234887	-0.264449
995	-0.298275	0.65489	-0.453569	-0.332816		0.594	0.196682	0.20462	0.188744	0.594	-0.249571	-0.234792	-0.26435
996	-0.329163	0.464044	-0.381332	0.194847		0.595	0.196575	0.204515	0.188634	0.595	-0.249481	-0.234704	-0.264258
997	-0.315863	0.0991405	-0.432984	0.307282		0.596	0.196478	0.204422	0.188535	0.596	-0.249399	-0.234625	-0.264173
998	-0.527687	0.0584666	-0.698154	0.240551		0.597	0.196391	0.204337	0.188445	0.597	-0.249323	-0.234552	-0.264093
999	-0.15113	0.194635	-0.523788	-0.0029985		0.598	0.196309	0.204257	0.188361	0.598	-0.249248	-0.234481	-0.264015
1000	-0.234287	0.240728	-0.73481	0.278705		0.599	0.196229	0.204179	0.18828	0.599	-0.249173	-0.23441	-0.263936
1001	-0.214813	0.234791	-0.703765	-0.0258343		0.6	0.19615	0.204102	0.188199	0.6	-0.249095	-0.234335	-0.263854
1002	-0.298211	0.340265	-0.75845	0.173093		0.601	0.19607	0.204023	0.188118	0.601	-0.24901	-0.234254	-0.263766
1003	0.0177855	0.488958	-0.361662	0.242498		0.602	0.195988	0.203942	0.188035	0.602	-0.248922	-0.234169	-0.263674
1004	-0.166309	0.236026	-0.219116	0.54321		0.603	0.195903	0.203857	0.187949	0.603	-0.248829	-0.23408	-0.263578
1005	-0.347261	0.366651	-1.03095	0.0673631		0.604	0.195815	0.203769	0.18786	0.604	-0.248734	-0.233987	-0.26348
1006	-0.0336872	0.334514	-0.580432	0.00125492		0.605	0.195723	0.203678	0.187768	0.605	-0.24864	-0.233897	-0.263384
1007	-0.552046	0.322009	-0.780643	-0.123629		0.606	0.195629	0.203584	0.187674	0.606	-0.248549	-0.233807	-0.26329
1008	-0.395451	0.0264617	-0.388094	-0.306381		0.607	0.195534	0.203489	0.18758	0.607	-0.248462	-0.233722	-0.263201
1009	-0.478718	0.687803	-0.662931	-0.242912		0.608	0.19544	0.203394	0.187486	0.608	-0.248379	-0.233642	-0.263117
1010	-0.389319	0.0670688	-0.849959	0.123298		0.609	0.195348	0.203302	0.187395	0.609	-0.248302	-0.233566	-0.263037
1011	-0.869393	0.979141	-0.527447	0.286276		0.61	0.19526	0.203213	0.187308	0.61	-0.248224	-0.23349	-0.262958
1012	-1.02663	0.198313	-0.682871	0.336128		0.611	0.195178	0.203129	0.187226	0.611	-0.248144	-0.233411	-0.262876
1013	-0.606583	0.765017	-0.774182	-0.0838069		0.612	0.195102	0.203052	0.187152	0.612	-0.248056	-0.233325	-0.262787
1014	-0.24174	0.389829	-0.726087	0.490895		0.613	0.195033	0.202982	0.187084	0.613	-0.247956	-0.233227	-0.262686
1015	-0.595546	0.502888	-0.677605	0.670281		0.614	0.19497	0.202917	0.187022	0.614	-0.247846	-0.233117	-0.262575
1016	-0.628784	0.747541	-0.815013	0.335703		0.615	0.194912	0.202858	0.186966	0.615	-0.247723	-0.232995	-0.262452
1017	-0.797998	-0.0415076	-0.578355	0.361319		0.616	0.194857	0.2028	0.186913	0.616	-0.247596	-0.232868	-0.262323
1018	-0.645617	0.518196	0.327153	0.600602		0.617	0.194802	0.202744	0.18686	0.617	-0.24747	-0.232744	-0.262197
1019	-0.709908	0.554361	-0.264682	0.129678		0.618	0.194744	0.202684	0.186805	0.618	-0.247353	-0.232627	-0.26208
1020	-0.800261	0.554348	-0.541005	0.14762		0.619	0.194681	0.202618	0.186743	0.619	-0.247254	-0.232529	-0.261979
1021	-0.566634	0.0604164	-0.153695	0.167782		0.62	0.194608	0.202544	0.186673	0.62	-0.247173	-0.232449	-0.261897
1022	-0.638724	0.267887	0.319871	0.618772		0.621	0.194526	0.202459	0.186593	0.621	-0.247112	-0.23239	-0.261835
1023	-0.275837	0.0786277	0.0730018	0.152904		0.622	0.194433	0.202365	0.186502	0.622	-0.247067	-0.232346	-0.261788
1024	-0.914217	0.207776	-0.255658	0.575017		0.623	0.19433	0.202259	0.1864	0.623	-0.247026	-0.232307	-0.261745
1025	-0.243246	0.301526	0.263908	0.436635		0.624	0.194217	0.202145	0.186289	0.624	-0.24698	-0.232264	-0.261697
1026	0.0250293	0.55543	-0.445261	0.41787		0.625	0.194097	0.202024	0.18617	0.625	-0.24692	-0.232206	-0.261635
1027	-0.271188	0.615449	-0.298578	-0.203899		0.626	0.193971	0.201897	0.186044	0.626	-0.246838	-0.232127	-0.26155
1028	-0.752345	0.204701	-0.838159	0.284841		0.627	0.193839	0.201765	0.185914	0.627	-0.246729	-0.23202	-0.261437
1029	-0.207936	0.2773	0.023267	0.287211		0.628	0.193702	0.201627	0.185777	0.628	-0.24659	-0.231884	-0.261296
1030	-0.32545	-0.0353236	-0.162629	0.626256		0.629	0.193561	0.201485	0.185636	0.629	-0.246427	-0.231724	-0.261131
1031	-0.136421	0.486741	0.0620515	0.236705		0.63	0.193414	0.201339	0.18549	0.63	-0.246243	-0.231542	-0.260944
1032	-0.303137	0.17728	-1.25543	0.106935		0.631	0.193262	0.201187	0.185338	0.631	-0.246047	-0.231348	-0.260746
1033	-0.852564	0.890757	0.101945	0.554495		0.632	0.193107	0.201031	0.185182	0.632	-0.245844	-0.231147	-0.260542
1034	-0.521829	0.372967	-1.0003	-0.09632		0.633	0.192947	0.200872	0.185023	0.633	-0.245644	-0.230947	-0.26034
1035	-0.388032	0.235882	-0.886737	0.721804		0.634	0.192785	0.20071	0.18486	0.634	-0.245451	-0.230756	-0.260147
1036	-0.660756	0.462874	0.0225644	0.271786		0.635	0.192622	0.200547	0.184697	0.635	-0.245271	-0.230576	-0.259966
1037	-0.601012	0.118985	-0.718414	0.341941		0.636	0.19246	0.200386	0.184535	0.636	-0.245108	-0.230413	-0.259803
1038	-0.180063	0.362181	0.175781	0.817049		0.637	0.192303	0.200229	0.184377	0.637	-0.244961	-0.230266	-0.259657
1039	-0.360059	0.559267	-0.360696	0.671869		0.638	0.192153	0.200079	0.184226	0.638	-0.244832	-0.230136	-0.259528
1040	-0.359932	0.503631	-0.0216776	0.36787		0.639	0.192013	0.19994	0.184086	0.639	-0.244719	-0.230023	-0.259416
1041	-0.185229	0.387227	-0.549828	0.320158		0.64	0.191886	0.199814	0.183958	0.64	-0.244624	-0.229927	-0.259322
1042	-0.316656	0.322269	-0.59956	0.666661		0.641	0.191774	0.199703	0.183846	0.641	-0.244547	-0.229848	-0.259246
1043	-0.29999	0.549246	-0.508052	0.53286		0.642	0.191677	0.199606	0.183747	0.642	-0.24449	-0.229789	-0.25919
1044	-0.657151	0.493103	-0.676967	0.0228268		0.643	0.191592	0.199522	0.183662	0.643	-0.244456	-0.229753	-0.259158
1045	-0.270368	0.671338	-0.739805	-0.221647		0.644	0.191519	0.19945	0.183588	0.644	-0.244445	-0.229741	-0.259149
1046	-0.640469	0.20853	-0.559942	0.356122		0.645	0.191454	0.199385	0.183523	0.645	-0.244456	-0.22975	-0.259162
1047	-0.444494	0.254458	-1.0281	0.0278053		0.646	0.191393	0.199325	0.183462	0.646	-0.244484	-0.229776	-0.259193
1048	-0.466871	0.233409	-0.973184	-0.323539		0.647	0.191335	0.199267	0.183403	0.647	-0.244522	-0.229811	-0.259233
1049	-0.315368	0.843792	-0.752037	1.08484		0.648	0.191275	0.199206	0.183343	0.648	-0.244558	-0.229844	-0.259271
1050	-0.426761	0.433562	-0.450711	0.531706		0.649	0.191211	0.199143	0.18328	0.649	-0.244583	-0.229867	-0.259299
1051	-0.402878	0.561184	-0.194397	0.554253		0.65	0.191143	0.199075	0.183212	0.65	-0.244586	-0.229868	-0.259305
1052	-0.38158	0.359796	-0.239707	0.211832
1053	-0.231545	0.790772	-0.760955	-0.241572
1054	-0.258639	0.779719	-1.11972	0.0877946
1055	-0.529365	0.511942	-0.484563	0.427017
1056	-0.365917	0.72994	-0.617225	0.36124
1057	-0.217826	0.475553	-1.09205	0.971422
1058	-0.407402	0.671555	-1.34158	-0.0501561
1059	-0.73899	0.148083	-0.834344	0.903744
1060	-0.0212684	0.701842	-1.00974	-0.165921
1061	-0.401874	0.873876	-0.714786	0.77066
1062	0.0465353	0.627434	-0.648715	0.77032
1063	-0.444982	0.669772	-0.215568	0.841602
1064	-0.476157	0.663674	-0.830026	0.843064
1065	-0.589895	0.588273	0.263099	0.751651
1066	-0.472354	1.12532	-0.946336	0.901338
1067	-0.56191	0.492154	0.359337	0.84008
1068	-0.316044	1.19654	-0.571749	0.650705
1069	-0.544082	0.732674	-0.727213	0.53012
1070	-0.60488	0.434839	-1.45706	0.0153542
1071	-0.0652228	-0.385294	-0.431605	0.739092
1072	-0.198252	-0.239995	-0.434768	0.761825
1073	0.0407447	-0.296073	-0.833822	0.798785
1074	-0.12979	-0.475509	-0.587939	0.761054
1075	-0.310914	-0.435178	-0.947713	0.160273
1076	0.0278157	-0.430178	-0.698979	-0.214136
1077	0.424639	-0.0828999	-0.876993	0.485745
1078	0.0369599	-0.126411	0.310054	0.0650833
1079	0.154852	-0.127713	-1.13466	-0.520547
1080	0.130453	-0.316302	0.231463	-0.10614
1081	0.110045	-0.115477	0.0254011	0.281408
1082	0.0625872	-0.145499	0.00420197	0.0848533
1083	0.25896	-0.0439326	0.245144	0.615384
1084	0.295679	0.0908168	-0.232263	0.53184
1085	0.137658	-0.384831	-0.20355	0.423411
1086	0.132826	-0.0219289	-0.0827168	-0.0968846
1087	0.0287426	-0.200561	-0.16727	0.310495
1088	0.437107	0.122337	-0.229508	-0.0572404
1089	0.274119	0.0845154	-0.528095	-0.0247772
1090	0.152763	-0.106398	-0.34355	0.0652722
1091	0.301971	-0.0461007	-0.78269	-0.180721
1092	0.331882	-0.0442922	-0.480842	0.156206
1093	0.330305	-0.00912024	-0.939917	0.0660916
1094	0.0393655	-0.153766	-0.667609	-0.117421
1095	0.242903	-0.0219495	-1.12443	0.0357293
1096	0.310872	0.0815513	-0.246336	0.606467
1097	0.0611644	0.0245709	-1.92239	-1.58336
1098	0.0971883	-0.124544	-0.327425	-0.0266069
1099	0.0484967	-0.188056	-1.24446	0.41967
1100	0.148779	0.176003	-1.19782	-0.585008
1101	0.0921279	0.00703263	-1.40904	-0.120164
1102	0.234609	0.348953	-0.104828	0.520069
1103	0.151936	-0.128617	-0.110331	1.26005
1104	0.154165	0.0472517	-1.04528	0.0995433
1105	0.0578744	0.0329947	-0.350377	0.526676
1106	0.208463	0.0880947	-1.1126	0.402776
1107	0.0554771	0.0679251	0.0337754	0.585233
1108	0.420801	0.221739	-0.258149	0.326654
1109	0.351256	0.234061	0.187892	0.557622
1110	0.271914	0.102485	-0.277186	0.893431
1111	0.114147	0.22222	-0.25248	0.21461
1112	0.402561	0.174539	-0.708947	0.15919
1113	0.353293	0.304417	-0.504705	0.233964
1114	0.215487	0.167429	-0.824087	0.250537
1115	0.152772	0.173713	-0.966564	0.000174971
1116	-0.185512	0.0226392	-1.03446	0.784875
1117	-0.0017808	0.0097779	-0.493862	-0.0791142
1118	0.071324	0.140623	-0.731376	-0.365698
1119	0.108027	0.0280247	-1.10968	-0.533415
1120	0.243774	0.0766219	-0.404339	0.726449
1121	-0.00409018	0.00549184	-0.264028	0.494001
1122	0.199726	0.169941	-0.322981	0.815211
1123	-0.0982083	0.0691727	-0.831587	-0.104245
1124	0.0468604	-0.0356856	-1.47274	0.539098
1125	-0.011977	-0.191002	-0.788298	0.762013
1126	-0.0261715	0.161173	-0.452246	0.742477
1127	0.214896	0.128449	-0.54388	0.339231
1128	0.113945	0.0582406	-0.859793	0.2305
1129	0.0869681	0.0691405	-0.266354	1.0168
1130	0.0104734	0.337748	-0.351562	0.411654
1131	0.0930168	0.186354	-1.72621	-0.0535435
1132	-0.231016	0.0370415	-0.15354	0.875637
1133	-0.0545072	-0.0432796	-0.220411	0.894144
1134	-0.0555049	-0.167259	-1.05471	-0.473349
1135	0.0905019	0.116421	-1.27053	0.385559
1136	-0.0216631	0.171775	-0.777642	0.601997
1137	0.174489	0.140746	0.701794	-0.408814
1138	0.00268289	0.286453	0.135621	-0.456506
1139	-0.0245021	0.309009	0.100033	-0.842015
1140	0.0886052	0.173916	-0.139602	-0.420966
1141	-0.0980674	0.00874146	0.0569617	-0.425047
1142	0.0589269	0.121849	-0.531072	-0.76319
1143	-0.0128054	0.0698555	0.337902	-0.140424
1144	0.220022	0.114587	-0.495901	0.0255445
1145	-0.132382	-0.0442997	-0.664176	-0.473302
1146	-0.0291686	0.252521	-0.627947	-0.0354612
1147	-0.285493	-0.0948076	-0.15866	0.013131
1148	-0.0113055	-0.20333	0.198526	-0.220879
1149	-0.198292	0.256583	-1.53496	0.117731
1150	0.234772	0.0278402	-0.43251	-0.239281
1151	-0.144141	0.0682847	-0.0585048	0.279612
1152	0.0562729	0.0320984	0.302238	0.203825
1153	0.00870193	0.220247	-0.556443	0.436685
1154	-0.0646266	0.195695	-0.598174	-0.438203
1155	0.171746	0.156565	-0.861319	-0.58665
1156	0.0405795	0.225792	-0.678065	0.0905697
1157	-0.155015	0.15701	-0.155117	0.197488
1158	0.0164528	0.150916	-0.781258	-0.198172
1159	0.199278	0.209647	-0.856307	0.0768711
1160	-0.0204328	0.292374	0.22115	0.174485
1161	-0.206081	0.159429	0.377862	-0.182196
1162	0.100812	0.0317124	-0.161767	0.538989
1163	-0.19752	0.172342	-0.512064	0.760119
1164	-0.102533	0.126347	-0.708339	0.0912691
1165	0.107547	0.0674942	-0.467342	0.604102
1166	0.090837	-0.132979	-0.305538	0.879962
1167	-0.15969	0.0841036	-0.979897	0.215776
1168	0.00371914	0.194597	-0.711962	0.217316
1169	-0.282302	0.0870473	-0.00731565	0.166724
1170	0.111637	-0.25985	-0.968792	-0.591551
1171	0.0158637	-0.251106	-0.916881	-0.165372
1172	-0.151052	0.24113	-0.11395	0.689345
1173	-0.270194	-0.131441	-1.17519	-0.659949
1174	0.0634883	-0.0135218	0.118517	0.592239
1175	0.109162	-0.134247	-1.17196	0.665316
1176	0.210183	-0.0253489	-0.714749	0.582102
1177	-0.136389	-0.0394939	-1.01026	-0.312491
1178	-0.210479	-0.121635	-1.74412	-0.825046
1179	-0.137602	0.121998	-0.412475	0.599108
1180	-0.258704	-0.0423161	-0.616012	0.791546
1181	-0.123481	0.156696	-0.561833	-0.839694
1182	-0.0309966	-0.152368	-0.909438	0.192952
1183	-0.00122186	-0.0030511	-0.808144	-1.5612
1184	-0.0395021	-0.140983	-1.28336	-0.817004
1185	-0.0551411	-0.312613	-1.70115	-0.823869
1186	-0.213646	0.181326	-0.542446	-1.00381
1187	0.0587953	0.0413552	-1.24031	-0.422869
1188	-0.00595015	0.382846	0.287745	-0.168017
1189	0.111748	0.144387	-1.43803	-1.58953
1190	-0.104268	-0.138738	-2.37769	-1.38874
1191	0.0332911	-0.082519	0.123594	-0.203305
1192	0.0354415	0.277142	-0.305751	-0.387343
1193	-0.0941944	0.42524	-1.02638	-1.90877
1194	-0.0356997	0.168418	-0.360205	0.311545
1195	0.0764797	0.211372	-0.355929	-0.815822
1196	0.0591454	0.271724	-1.2034	-2.26032
1197	-0.126498	0.0379108	-1.04381	-0.184064
1198	0.182358	0.0863652	-0.664369	0.254059
1199	-0.223726	-0.202757	-0.0753741	0.321866
1200	-0.129689	0.0695511	-0.320145	-0.0223849
1201	-0.266234	-0.108708	-0.294795	0.489147
1202	0.552654	0.668089	-0.338259	0.0505612
1203	0.250961	0.0804824	-0.258145	0.225674
1204	0.388342	0.397805	-0.383185	0.00185855
1205	-0.0975283	0.196909	-0.386998	0.339752
1206	-0.0369907	0.327591	-0.490264	0.234376
1207	0.0303351	-0.180847	-0.601214	-0.405207
1208	0.294257	0.502033	-0.541713	0.0683314
1209	0.0503289	0.0923882	-0.734372	-0.161041
1210	0.142152	0.32978	-0.535862	-0.195287
1211	-0.0763547	0.132574	-0.510525	-0.374592
1212	0.260162	0.0824993	-0.689408	0.217019
1213	-0.268586	0.0895526	-0.504668	0.182172
1214	0.200845	0.389094	-1.08853	0.3441
1215	-0.00170209	-0.0939129	-1.08939	-0.289413
1216	-0.152107	0.143812	-1.26906	-1.16702
1217	0.366228	0.460438	-1.41265	-0.334919
1218	-0.131606	0.301299	-0.564618	0.134885
1219	-0.168276	0.000113709	-0.873699	0.275157
1220	0.0546262	-0.046888	-0.656571	0.107821
1221	-0.00422834	0.142652	-0.316488	0.153431
1222	0.0583122	0.240071	-1.28375	0.0158739
1223	-0.0424136	0.153204	-0.274833	-0.107902
1224	-0.0391002	0.33885	-1.06223	-0.0881405
1225	0.00330891	0.24567	-0.604234	0.371981
1226	-0.0837972	-0.0665919	-0.718222	0.0998507
1227	-0.369873	0.19127	-0.491891	0.138383
1228	-0.130809	-0.0784398	-0.264791	0.237636
1229	0.00989289	0.203584	-0.652709	0.103649
1230	0.168602	0.00476914	-0.681329	0.299463
1231	-0.140386	0.227474	-0.987264	-0.383267
1232	-0.232742	0.0248136	-0.559822	0.194784
1233	0.169737	0.138944	0.0449302	0.110179
1234	-0.0390635	0.271473	-1.25728	0.157343
1235	-0.167878	0.338197	-0.99527	0.119681
1236	-0.0874735	0.200485	-0.24999	-0.0296894
1237	0.110746	0.109943	-0.624467	-0.327753
1238	-0.0591345	0.132666	-1.38324	-0.581044
1239	-0.0294389	-0.13058	-0.555787	0.42912
1240	-0.134088	0.28133	-0.894458	0.039574
1241	-0.231708	-0.224503	-0.620486	0.264924
1242	0.060202	0.247496	-0.373673	0.199896
1243	-0.0220287	0.169962	-1.51853	-0.0537744
1244	0.0922335	0.128778	-1.01505	-0.060026
1245	0.0917026	0.0756278	-0.612112	0.142249
1246	0.229787	0.957366	-0.412161	0.136808
1247	-0.123693	0.192044	-0.978042	0.0577848
1248	-0.243524	-0.0455132	-1.193	0.323065
1249	0.0776605	-0.000332301	-0.424377	0.487494
1250	-0.18299	-0.00482377	-0.555856	0.364101
1251	0.024207	0.33478	-0.849376	0.45785
1252	0.0186589	0.29158	-0.812784	-0.170759
1253	0.114938	0.172785	-0.246979	0.919949
1254	-0.221255	0.0754437	-0.129055	0.521051
1255	0.0607907	0.249582	-0.442479	0.634414
1256	-0.0507269	0.38154	-0.637532	0.503459
1257	0.11724	0.198591	-0.751813	0.265459
1258	-0.176871	0.00849923	-0.659289	0.758623
1259	0.0600094	0.209669	-0.827492	0.337401
1260	-0.237287	0.0402206	-1.04391	0.324769
1261	-0.1713	-0.0441992	-1.04416	-0.345373
1262	-0.195734	0.205057	-0.509554	0.608337
1263	0.240677	0.211907	-0.142539	0.415511
1264	-0.393277	0.0460277	0.022583	0.555174
1265	-0.404127	0.177747	-0.273582	0.507698
1266	-0.116883	0.0932293	-0.171963	0.225882
1267	-0.252777	0.309767	-0.128668	0.643462
1268	-0.149802	0.0483331	-0.153146	0.479748
1269	-0.225168	0.113093	-0.166342	0.591717
1270	0.0939377	0.234677	-0.574334	0.489021
1271	-0.239657	0.229402	-0.0154208	0.522808
1272	0.0560783	0.464089	-0.83595	0.118902
1273	-0.154603	0.356493	-0.0522973	-0.000483167
1274	-0.103782	0.161086	-0.0414678	1.07171
1275	-0.0704143	-0.00695551	-0.395945	0.414104
1276	-0.0746025	-0.00932744	-0.377893	0.842429
1277	0.0643745	0.303754	-0.193158	0.501127
1278	0.0183711	0.210112	-0.671767	0.22667
1279	0.709909	0.844414	-0.410995	0.736229
1280	-0.184873	0.590053	-0.226804	0.581189
1281	-0.0472421	0.435417	-0.95552	0.502746
1282	-0.093777	0.480185	-0.240116	0.702858
1283	0.277654	0.466283	-0.156311	0.451198
1284	-0.0184663	0.711287	-0.401399	0.934762
1285	0.0322135	0.641663	-0.551264	0.554202
1286	-0.4194	0.540962	-0.0583807	0.851216
1287	-0.0186826	0.611998	-0.460218	1.05232
1288	-0.0815746	0.546754	-0.611036	0.843054
1289	-0.184647	0.0813056	-0.0512357	0.850703
1290	-0.107781	0.439913	-0.290642	0.601049
1291	0.0421597	0.77923	-0.136095	0.950751
1292	-0.287188	0.409331	-0.0674661	0.93221
1293	-0.064365	0.52947	-0.398541	0.454647
1294	-0.151837	0.378477	-0.32608	0.739401
1295	-0.243069	0.331527	-0.19878	0.800769
1296	0.20654	0.833414	-0.177905	0.882849
1297	-0.182335	0.652168	-0.174199	0.91003
1298	-0.236674	0.327375	-1.24454	-0.536731
1299	-0.0223571	0.450222	-0.0173478	0.777839
1300	0.0335832	0.328965	-1.4139	1.2425
1301	-0.355235	-0.14124	-0.224409	0.489227
1302	-0.140544	0.640783	-1.93383	2.06691
1303	-0.412694	0.496735	-0.0689635	0.893407
1304	-0.218021	0.218181	0.114393	0.794219
1305	-0.371411	0.242714	-0.304086	0.292973
1306	-0.346227	0.181177	-1.13591	0.03596
1307	-0.643511	0.351771	-0.526787	0.43256
1308	-0.344253	0.439642	-1.04953	0.474925
1309	-0.364379	0.431952	-1.01316	0.619405
1310	-0.235761	0.382548	-1.18306	1.08551
1311	0.0147084	0.55841	-2.41815	-0.418122
1312	-0.422734	-0.0288503	-1.84535	0.209635
1313	-0.0586069	0.588464	-0.922964	1.04166
1314	0.119055	0.511975	-1.20148	0.481387
1315	-0.00385688	0.468756	-2.46918	-0.839918
1316	-0.333364	0.394543	-1.388	0.633046
1317	-0.0845282	0.354258	-1.60482	0.0738892
1318	-0.573435	0.430101	-1.39428	0.408678
1319	-0.098323	0.533208	-2.01186	-0.0301435
1320	-0.412175	0.147728	-0.248244	0.211006
1321	-0.149131	0.664725	-0.0618493	0.512232
1322	-0.0787928	0.393413	-0.133067	0.134746
1323	-0.2161	0.48716	-0.0172547	0.242785
1324	-0.35552	0.377527	-0.171483	0.174677
1325	-0.231799	0.391058	-0.0371306	0.194438
1326	-0.247454	0.415548	-0.182073	0.392135
1327	-0.133156	0.434242	-0.16868	0.218705
1328	-0.317933	0.281509	0.0861239	0.223038
1329	-0.226828	0.34584	-0.762926	-0.296905
1330	-0.130732	0.310685	-2.00988	-0.178362
1331	0.0381351	0.503131	0.0784594	1.18636
1332	-0.260936	0.446527	-0.475196	0.020879
1333	-0.51236	0.248573	-1.35292	-0.206496
1334	-0.520795	0.412302	-0.684776	0.0501878
1335	-0.437089	0.416421	-0.558115	-0.294724
1336	-0.506463	0.272953	-0.855116	-0.0813722
1337	-0.268198	0.386863	-0.548039	0.457915
1338	-0.340176	0.433597	-0.696838	0.156203
1339	-0.323612	0.0808281	0.370312	0.63404
1340	-0.783293	0.470994	-0.167866	0.612602
1341	-0.166491	0.78766	-0.0590679	0.612536
1342	-0.490779	0.482564	-0.599002	0.576371
1343	-0.0682609	0.300598	-0.0370256	0.77719
1344	-0.178307	0.494842	-0.095966	0.422876
1345	-0.147629	0.36727	-0.281516	0.450276
1346	-0.594108	0.6837	-0.662246	0.58002
1347	-0.423532	0.587349	-0.574285	0.221208
1348	-0.305283	0.534324	-0.813409	0.29177
1349	-0.327693	0.647589	-0.142831	1.12837
1350	-0.24513	0.48072	-0.257863	1.41775
1351	-0.546985	0.725634	-1.29834	0.699533
1352	-0.766541	0.146073	-0.228916	1.05619
1353	-0.566966	0.520853	-0.392421	0.856096
1354	-0.0701885	-0.446562	-0.0880889	0.806784
1355	-0.207568	-0.375268	-0.234334	0.941056
1356	-0.276291	0.0986653	-1.05675	0.682107
1357	-0.284733	-0.458865	-0.729688	0.400403
1358	-0.0675956	-0.819063	-0.703686	0.507996
1359	-0.0389658	-0.25323	-1.07517	0.1575
1360	-0.292124	-0.716481	-1.38597	-0.157391
1361	-0.239469	-0.0188816	-0.708712	1.15794
1362	-0.312835	-0.448338	-0.349862	1.25633
1363	-0.0277446	-0.43027	-1.00064	0.528836
1364	-0.24884	-0.426892	-0.820165	0.468758
1365	-0.0209266	-0.318508	-0.814657	0.697208
1366	0.0389246	-0.249811	-1.11212	0.614392
1367	-0.119179	-0.243589	-0.468692	1.3141
1368	-0.256312	-0.320779	-0.576862	0.727363
1369	-0.174537	-0.303927	-0.0948639	1.32101
1370	-0.148083	-0.163234	-0.633953	0.891484
1371	-0.157075	-0.157314	-1.47601	-0.633222
1372	-0.0241367	-0.0434482	-2.16626	0.0514521
1373	-0.0485927	-5.87276e-05	-0.919668	0.476183
1374	-0.0973612	-0.330814	-1.67232	0.32541
1375	-0.151246	0.130957	-0.389362	1.09699
1376	-0.00766904	0.159348	-1.76523	-0.138958
1377	0.0856649	-0.312858	-1.67213	0.624032
1378	0.353245	-0.19407	-1.12098	1.16029
1379	-0.0920921	-0.0705153	-0.819016	0.436982
1380	0.343898	0.0843447	-0.933041	0.750837
1381	0.304886	-0.0516863	-1.28957	0.707143
1382	0.258021	-0.0332109	-1.30391	1.26402
1383	0.245112	-0.0520843	-0.663685	1.39647
1384	0.0415156	-0.161821	-0.372521	0.310849
1385	0.377614	-0.127562	-0.449154	-0.0528685
1386	0.143902	-0.138677	-0.184262	0.29697
1387	0.331514	-0.194164	-0.103104	0.436786
1388	0.243236	-0.182952	-0.122601	0.154221
1389	0.314855	0.0920632	-0.571463	0.31709
1390	0.322128	0.187382	-0.0782862	0.301306
1391	0.35245	0.201234	-0.503566	0.639245
1392	0.224701	0.3968	-0.363768	0.279569
1393	0.424254	-0.0286396	-0.658625	0.375026
1394	0.371534	0.0818222	-0.395651	0.201955
1395	0.319609	-0.0741318	-0.304948	0.65143
1396	0.289102	-0.231272	-0.636651	0.741092
1397	0.196725	0.0706996	0.153672	0.086901
1398	0.557012	-0.234381	-0.389452	1.13506
1399	0.382891	-0.00654608	-0.656195	0.862468
1400	0.42759	0.0940028	-0.483743	0.954007
1401	0.431048	0.271682	-0.72103	0.797046
1402	0.157288	0.218875	-0.609974	0.734589
1403	0.238632	0.113163	-0.718487	0.70613
1404	0.294538	-0.180951	-0.844982	0.765411
1405	0.268218	-0.103548	-0.7882	0.768846
1406	0.342461	0.00562347	-0.462878	1.02141
1407	0.229376	-0.0723219	-1.00495	0.696554
1408	0.290435	2.27111e-05	-0.690025	0.79531
1409	0.386999	0.0391296	-0.48588	1.19617
1410	0.41428	-0.129507	-0.782537	0.579811
1411	0.143378	-0.107797	-0.604462	0.606333
1412	0.437987	0.203601	-1.1725	1.21172
1413	0.410077	-0.0427552	-0.404708	0.299311
1414	0.381228	0.232796	-0.765337	0.500152
1415	0.289732	0.167867	-0.598912	1.04466
1416	0.427845	0.273578	-1.20946	0.458185
1417	0.175141	0.138518	-0.74126	1.02533
1418	0.215977	0.0367808	-0.930086	0.51669
1419	0.187109	0.117341	-0.881509	0.500896
1420	0.0863053	-0.0448691	-1.20803	0.52288
1421	0.389757	0.0671898	-0.414648	0.85217
1422	-0.184263	0.595284	-1.2631	0.764538
1423	-0.484004	0.753543	-0.925016	0.535751
1424	-0.294626	0.687343	-1.32329	0.0592292
1425	-0.0566665	0.442138	-0.969539	0.837127
1426	-0.335853	0.657631	-0.9094	0.97059
1427	-0.249805	0.865954	-0.784886	0.828719
1428	-0.339609	0.853954	-0.794661	1.03494
1429	-0.330399	0.694065	-0.495937	0.17048
1430	-0.302771	0.596692	-1.3698	0.860669
1431	-0.43691	0.647018	-1.04424	0.920096
1432	-0.266199	0.640859	-0.529324	0.89612
1433	-0.337081	0.582838	-1.09305	0.436492
1434	-0.293776	0.763219	-0.847669	1.43217
1435	-0.181542	0.717578	-0.781116	1.07143
1436	-0.310017	0.833624	-0.693867	1.40993
1437	-0.326469	0.473689	-0.708067	1.30042
1438	-0.258652	0.869185	-0.95083	1.02906
1439	-0.496383	0.701113	-0.698043	1.1037
1440	-0.238903	0.692897	-0.222806	0.297579
1441	-0.490866	0.799699	-0.610238	0.309649
1442	-0.145254	0.740708	-0.343675	0.516085
1443	-0.427317	0.689934	-0.395771	0.19635
1444	-0.392194	0.715231	-0.110556	0.445808
1445	-0.565734	0.293291	-0.270617	0.435086
1446	-0.362834	0.679408	-0.484883	0.197338
1447	-0.624061	0.80095	-0.321905	0.0758455
1448	-0.417578	0.605183	0.0439841	0.136199
1449	-0.137687	0.70492	0.015372	0.477935
1450	-0.645845	0.656826	-0.939962	0.420692
1451	-0.12803	0.552885	-0.396454	0.0793303
1452	-0.353625	0.66267	-0.338508	0.599606
1453	-0.231163	0.565173	-0.633756	0.438493
1454	-0.370983	0.825591	-0.119329	0.516361
1455	-0.464774	0.513043	-0.431949	0.668004
1456	-0.25938	0.712904	-0.421455	0.496174
1457	-0.448935	0.363196	-0.835864	0.945656
1458	-0.562263	0.411813	-0.580881	0.328407
1459	-0.34993	0.383988	-1.05628	0.835571
1460	-0.262904	0.908056	-0.229041	0.514194
1461	-0.409963	0.690531	-0.939955	0.728689
1462	-0.464268	0.406068	-0.130852	0.64012
1463	-0.532442	0.398383	-0.872337	0.601382
1464	-0.290125	0.886998	-0.931721	0.676088
1465	-0.623809	0.408026	-0.864211	1.08114
1466	-0.326737	0.340094	-0.947669	0.622899
1467	-0.287815	0.535973	-0.630759	0.705879
1468	-0.384566	0.347737	-0.625568	0.827498
1469	-0.18344	0.671656	-0.32624	0.947781
1470	-0.354679	0.494598	-0.747244	0.692605
1471	-0.0410119	0.677077	-0.869194	0.270777
1472	-0.382406	0.608216	-1.56503	0.629397
1473	-0.12938	0.537365	-0.342355	0.653994
1474	-0.15289	0.849134	-0.75553	0.613421
1475	-0.151454	0.584769	-0.547437	0.227264
1476	-0.358653	0.523087	-0.687328	0.0800835
1477	-0.0802281	0.715629	-0.90331	0.208699
1478	-0.3562	0.470893	-0.840739	-0.718235
1479	-0.44956	0.530787	-0.761745	0.0260726
1480	-0.320238	0.543264	-0.901255	0.966115
1481	-0.408452	0.377932	-2.01043	0.18904
1482	-0.112135	0.557573	-1.59079	0.0876103
1483	-0.404984	0.52924	-0.95798	0.476593
1484	-0.408687	0.287362	-1.23905	-0.269259
1485	0.0746744	-0.190265	-1.53236	-0.224433
1486	-0.104016	0.0292472	-0.835199	0.105996
1487	-0.0536407	-0.508898	-1.12844	-0.102994
1488	0.215662	-0.118885	-0.981906	-0.414018
1489	0.0958447	-0.264356	-0.70871	-0.78986
1490	0.176055	0.039988	-0.948383	0.199458
1491	0.0720571	-0.253417	-1.68158	0.969879
1492	0.0189839	-0.146162	-0.252845	0.290704
1493	0.11673	-0.128169	-0.672002	-0.171959
1494	0.0342359	0.0781127	-0.154075	0.373442
1495	-0.0478796	-0.175253	-0.331222	0.122777
1496	-0.094428	0.164676	-0.514947	0.559101
1497	-0.223154	0.241933	-0.502102	0.529462
1498	-0.0949162	0.0512978	-0.225215	0.7267
1499	0.0591662	0.176949	-0.381153	-0.0812587
1500	-0.0427633	0.589409	-0.740626	0.0690515
1501	-0.169319	0.0793078	-0.2919	0.431482
1502	0.0783715	0.0150499	-1.01645	0.0524634
1503	-0.309677	0.0920892	-0.54281	0.330323
1504	-0.13209	0.107217	-0.25566	0.466607
1505	-0.0324631	0.437176	-1.2985	0.239578
1506	0.083708	0.120092	-1.25871	0.139969
1507	-0.223532	0.335321	-1.22221	0.441284
1508	-0.147031	-0.0585438	-1.31208	-0.179815
1509	-0.0499116	-0.0879667	-1.10624	0.182937
1510	-0.0298188	0.0466495	-0.740547	0.232743
1511	0.0270296	0.123867	-0.955661	0.138669
1512	-0.242657	0.0765069	-0.76188	0.614566
1513	-0.0610121	0.199942	-0.947377	0.110262
1514	-0.166093	0.269241	-0.299497	0.0875521
1515	-0.0126834	-0.120814	-0.840813	0.410218
1516	-0.0222835	0.0375357	-0.478689	0.314363
1517	-0.213217	-0.0048175	-0.462194	0.360741
1518	-0.0228537	-0.0515354	-0.593021	0.124959
1519	-0.0233161	0.388299	-0.546256	0.0243372
1520	-0.227234	0.0991703	-0.480501	0.0941888
1521	0.018886	0.32772	-0.667705	0.873283
1522	-0.04379	0.179343	-1.03596	0.358646
1523	-0.077656	0.501361	-0.519118	-0.0163512
1524	-0.046199	0.689848	-0.770037	0.301208
1525	-0.270317	0.133069	-0.869266	0.601543
1526	-0.364337	0.568477	-0.571477	0.516702
1527	0.0809326	0.219617	-0.516054	0.207847
1528	-0.103908	0.738517	-0.380232	0.304197
1529	-0.151802	0.509146	-0.53344	0.385508
1530	0.110199	0.366934	-0.814291	0.247277
1531	-0.0978776	0.0577788	-0.939537	0.535948
1532	-0.16741	0.563365	-0.608964	0.109134
1533	-0.284451	0.434752	-0.725385	0.381029
1534	-0.00405269	0.459355	-0.79252	0.438752
1535	0.176935	0.449579	-0.747283	0.808427
1536	0.0260114	0.623634	-0.756056	0.434681
1537	0.20295	0.139339	-0.612298	0.445126
1538	-0.0897663	-0.0314064	-0.839211	0.352351
1539	0.0932634	0.0875581	-1.00232	0.110261
1540	0.0535397	0.345022	-0.601692	0.414403
1541	-0.0226746	0.322368	-0.677517	0.692473
1542	-0.2447	0.066181	-0.914963	0.311017
1543	0.164363	0.279544	-2.03567	0.859137
1544	-0.18192	0.444694	-0.854382	0.457364
1545	-0.228763	0.264678	-0.653822	0.307603
1546	-0.412769	0.482552	-0.648402	0.275259
1547	-0.270015	0.137729	-0.912523	0.4286
1548	0.096773	-0.0148997	-0.422305	0.332414
1549	-0.128141	-0.0494416	-0.534942	0.837206
1550	-0.265418	0.41042	-0.472455	0.191658
1551	-0.274079	0.66433	-0.651494	0.75069
1552	-0.311262	0.0229124	-0.445948	0.240473
1553	0.0111626	0.0270886	-1.06279	0.68344
1554	-0.272711	0.489061	-1.21592	0.623551
1555	-0.178041	-0.293789	-0.677203	0.212334
1556	-0.327711	0.0413265	-0.396169	0.562818
1557	-0.369277	0.107915	-0.447188	0.122222
1558	-0.536897	-0.0328924	-0.428002	0.0401203
1559	-0.107529	-0.127666	-0.240267	0.523866
1560	-0.0480815	-0.220462	-0.191792	0.418865
1561	-0.208051	-0.200344	-0.333104	0.143224
1562	-0.248671	-0.35861	-0.235866	0.604616
1563	-0.0219069	-0.566302	-0.555464	0.275957
1564	0.145983	-0.220122	-0.207401	0.481229
1565	-0.23284	-0.0202417	-0.420952	0.14851
1566	-0.0130099	-0.0140139	-0.750657	0.0842756
1567	-0.0714332	-0.165572	-0.514229	0.298277
1568	-0.0332573	-1.02541	-0.832701	-0.314513
1569	0.310675	-0.360507	-0.558244	0.15756
1570	0.948806	-1.03913	-0.787621	0.408027
1571	0.540435	-0.971577	-0.120235	0.400903
1572	0.440807	0.478755	-0.42343	0.35495
1573	1.11919	-1.50381	-0.643303	0.256214
1574	-0.317859	-0.622826	-0.695993	0.321939
1575	-0.124426	-0.432848	0.0185355	0.629017
1576	-0.0539642	-0.114375	-1.04835	0.154545
1577	0.0640083	-0.133384	-0.72995	0.643035
1578	-0.0897875	-0.105346	-0.636365	0.234722
1579	-0.054819	-0.0398581	-0.486136	0.306641
1580	-0.041353	-0.0550038	-0.545844	0.128438
1581	0.138771	-0.149159	-0.549074	0.397987
1582	-0.0720994	-0.019275	-0.246287	0.210701
1583	-0.00852225	-0.240276	-0.264271	0.423933
1584	-0.118884	-0.194218	-0.790542	0.307254
1585	0.147734	-0.0812808	-0.472646	0.140701
1586	0.328457	-0.0372101	-0.306617	0.277056
1587	0.130135	-0.0634624	-0.429975	0.0676314
1588	0.0854968	0.112133	-0.448931	0.299354
1589	0.146757	0.141056	-0.538313	0.116379
1590	0.107013	-0.110424	-0.0999473	0.26433
1591	0.0666668	-0.170409	-0.716654	-0.07965
1592	0.0453903	0.0760076	-0.045013	0.169004
1593	0.111312	-0.0317638	-0.798653	0.293296
1594	0.185362	-0.0968389	0.403372	0.399619
1595	0.116622	0.199743	-0.385183	0.481392
1596	0.0757941	0.0246933	-0.235818	0.231376
1597	0.301311	0.968813	-0.222044	0.464933
1598	0.254892	0.659484	-0.0928102	0.518355
1599	0.0414545	0.0699076	-0.254984	0.270369
1600	0.0375885	0.0100067	-0.620165	0.449626
1601	0.146025	0.13591	-0.331809	0.257199
1602	0.0780979	-0.124945	-0.820417	0.278051
1603	0.326867	0.415933	-0.365452	0.00267783
1604	0.149357	0.107902	0.370671	0.26461
1605	0.0087969	0.158519	-0.488544	0.213894
1606	0.178503	0.236958	-0.612969	-0.00475101
1607	0.0492525	0.208945	-0.575532	0.223325
1608	-0.0556842	0.0698276	-0.859278	-0.571158
1609	0.0487025	0.0801135	-0.0558266	0.314962
1610	-0.0909395	0.308917	-0.504643	0.41362
1611	-0.0322692	0.406794	-0.298143	0.183408
1612	-0.174581	0.44014	-0.486981	0.306548
1613	0.183245	-0.0401573	-0.194084	0.465029
1614	0.0261747	0.412831	-0.453139	0.384793
1615	0.0149574	0.240936	-0.386594	0.0118453
1616	-0.0624201	0.116203	-0.487675	-0.0988415
1617	0.184255	0.311975	-0.660444	0.306768
1618	0.144475	0.0829596	-0.322906	0.411755
1619	-0.0112993	-0.0353283	-0.198411	0.290631
1620	-0.0517173	0.277535	-0.408449	0.0621274
1621	0.0989619	0.135153	-0.707754	0.0354492
1622	-0.107209	0.139694	-0.624388	0.268614
1623	0.131297	0.147662	-0.353748	0.583841
1624	-0.0661808	0.186655	-0.867799	-0.367953
1625	0.0554814	0.110672	-0.823738	0.174707
1626	0.00035599	0.254926	-0.347646	-0.761287
1627	0.20279	0.231479	-0.633524	-0.373868
1628	0.354868	0.446483	-0.677454	-0.0167012
1629	0.0824862	-0.309619	-0.580937	-0.537342
1630	0.498898	0.313386	-0.633473	-0.49519
1631	0.105596	0.308839	-0.306819	-0.394276
1632	0.109193	0.124122	-0.477948	-0.436473
1633	-0.0190498	0.428786	-0.935722	-0.0257279
1634	-0.401726	0.476437	-0.745169	0.118723
1635	-0.0689821	0.501964	-0.639056	-0.0597314
1636	-0.36169	0.125443	-0.876778	-0.2417
1637	-0.103939	0.746487	-0.857389	0.117178
1638	-0.0776976	0.475445	-0.562095	0.260642
1639	-0.522281	0.816625	-0.281815	0.113069
1640	-0.1082	0.388786	-0.470553	0.00322936
1641	-0.323107	0.691438	-0.844957	0.0651581
1642	-0.324941	0.341511	-0.875297	0.462533
1643	-0.233073	0.774381	-0.84731	0.0277431
1644	-0.252294	0.55573	-0.92052	0.431643
1645	-0.137637	0.402112	-1.25852	-0.0796554
1646	-0.167292	1.06139	-0.680668	0.314258
1647	-0.737196	0.780367	-0.807974	0.296567
1648	-0.389608	0.730879	-0.525008	0.0298862
1649	-0.339582	0.680835	-0.774798	0.0794545
1650	-0.302321	0.533821	-1.34445	0.577236
1651	-0.232225	0.61182	-0.193378	0.191738
1652	-0.462857	0.79847	-0.821866	0.293252
1653	-0.557639	0.550242	-1.12424	0.0986721
1654	-0.187818	0.483267	-0.83307	0.78112
1655	-0.239432	0.724935	-0.719377	0.558021
1656	-0.452687	0.645417	-0.687303	0.642848
1657	-0.717105	0.730719	-0.64518	0.61204
1658	-0.327081	0.747894	-0.49884	0.278236
1659	-0.204573	0.65781	-0.344121	0.273843
1660	-0.274062	0.5808	-0.509999	0.644859
1661	-0.292951	0.537164	-0.388053	0.469236
1662	-0.226455	0.630241	-0.888755	0.409669
1663	-0.122785	0.388264	-0.898874	0.581825
1664	-0.30148	0.84381	-0.579661	0.77347
1665	-0.206155	0.44263	-0.741528	0.982343
1666	-0.162367	0.813783	-1.32104	0.597818
1667	-0.020462	0.603304	-0.711672	0.862139
1668	0.00135321	0.628425	-0.979061	1.42103
1669	-0.180064	0.451493	-1.03606	0.961889
1670	0.0577191	0.646568	-0.953093	1.47552
1671	0.00792336	0.406339	-0.733259	1.31061
1672	-0.137741	0.254808	-1.01833	1.45299
1673	0.218208	0.807771	-0.795997	2.1014
1674	-0.217034	0.395704	-1.04812	1.73723
1675	-0.300425	0.789987	-0.963636	1.57078
1676	-0.131618	0.611465	-0.690473	2.96847
1677	-0.115154	0.723191	-0.626288	1.31309
1678	-0.105014	0.730368	-0.936111	0.743415
1679	-0.147242	0.998648	-0.463822	0.467903
1680	-0.126876	0.656778	-0.483425	0.356276
1681	-0.200755	0.263917	-0.82394	0.505022
1682	-0.147101	0.154671	-0.616086	0.689556
1683	-0.055436	0.298126	-0.449485	0.302661
1684	-0.49213	0.118099	-0.604204	0.513359
1685	-0.209316	0.327138	-0.589381	0.620518
1686	-0.399069	0.0770905	-0.645281	0.918891
1687	-0.199224	-0.0255156	-0.403613	0.455835
1688	-0.404688	0.047564	-0.597388	0.591744
1689	-0.05123	0.169207	-1.06289	1.3294
1690	-0.294283	0.213947	-0.812725	0.716161
1691	-0.115742	0.04417	-0.256325	0.465704
1692	0.00944656	0.24847	-1.04714	1.02209
1693	-0.222463	0.210315	-0.856972	1.23318
1694	-0.135407	0.0924753	-0.907084	0.755403
1695	-0.153932	0.250061	-0.730927	0.588006
1696	-0.139602	0.0261365	-0.944502	0.946303
1697	0.116912	0.100359	-0.692797	0.814458
1698	0.12952	0.343826	-0.984747	0.866004
1699	0.0149185	0.070011	-1.05711	0.789804
1700	0.0439859	0.288456	-1.01213	1.06164
1701	0.220856	-0.0427351	-0.999881	1.04678
1702	0.0529565	0.0417547	-0.610095	1.11573
1703	0.0338567	-0.24929	-0.528103	0.737011
1704	0.0237579	-0.0769427	-0.69051	0.538372
1705	0.119754	-0.0204363	-0.818467	1.08559
1706	0.136649	0.00256795	-0.695261	0.956102
1707	0.271081	1.17164	-1.16725	1.26932
1708	0.0796676	0.219775	-0.607141	1.13875
1709	0.0825884	0.260293	-0.926797	1.67518
1710	0.119717	0.0715247	-1.31088	1.7623
1711	0.103381	0.141398	-0.864928	1.73704
1712	0.0344852	-0.0904007	-0.992789	1.6954
1713	0.467008	0.00857745	-0.741668	1.71056
1714	-0.182976	-0.0905475	-0.907632	1.88822
1715	0.228697	0.0115574	-0.822376	1.71241
1716	0.0771767	0.00767433	0.0135243	-0.361611
1717	0.134211	0.0367527	-0.216338	-0.466875
1718	-0.054924	0.0781096	-0.0836249	-0.438851
1719	-0.0590001	0.104061	0.267084	-0.197161
1720	-0.0792611	0.233297	0.224546	-0.0307242
1721	0.0723783	0.246959	0.331333	-0.343701
1722	0.000849388	0.00528657	0.0300233	-0.132801
1723	-0.167528	0.155923	0.229517	0.799555
1724	-0.180644	0.079494	0.325797	-0.270009
1725	0.222784	0.18547	-0.364345	-0.124326
1726	-0.125413	0.0578884	0.103943	-0.310538
1727	0.144852	0.261852	-0.0480343	0.000504062
1728	-0.152707	0.186946	0.0567538	0.286561
1729	0.0736953	0.158041	1.02546	0.359885
1730	-0.108116	0.189949	-0.507847	0.252599
1731	-0.0149524	0.0654866	0.131345	0.0330645
1732	-0.115201	0.143417	-0.522295	1.63531
1733	-0.0911685	0.0857319	-0.953457	1.33307
1734	0.0434889	0.222067	-0.726682	0.91521
1735	-0.0704344	-0.105636	-0.500025	0.219512
1736	-0.117234	0.154033	-0.590092	0.83646
1737	-0.0855466	-0.0297397	-1.09954	0.845505
1738	-0.00272906	0.177582	-0.518856	0.872226
1739	-0.149535	0.338518	-0.65079	0.597113
1740	-0.0307656	0.301144	-1.05799	0.361795
1741	-0.147782	-0.0314587	-0.313631	0.278428
1742	-0.0250247	0.100136	-0.113149	0.431428
1743	-0.0255601	0.136762	-0.57655	0.632247
1744	-0.189491	0.145934	-0.176614	-0.399114
1745	-0.136755	0.0667813	-0.568981	0.453655
1746	-0.0245423	0.0735955	-0.162599	0.334271
1747	-0.202784	0.162184	-1.06487	0.614258
1748	-0.189712	0.045804	-0.330163	0.547976
1749	-0.129061	0.0533252	-0.685742	0.561022
1750	-0.23523	0.0217989	-0.597001	0.177991
1751	0.00971509	0.40861	-0.524211	-0.0904762
1752	0.0918692	0.246041	-1.07204	0.658975
1753	0.00385465	0.0968553	-0.52464	0.617687
1754	-0.162446	0.583917	-0.0590446	0.103328
1755	-0.444119	0.710398	-0.770437	0.325995
1756	-0.225763	0.4244	-0.87509	0.231278
1757	-0.232277	0.496575	-0.570726	0.449422
1758	-0.315494	0.793075	-0.301132	0.101463
1759	-0.242958	0.444608	-1.17235	0.539222
1760	-0.215243	0.466444	-1.05569	0.622765
1761	-0.555402	0.482499	-0.803233	0.467558
1762	-0.368332	0.658344	-1.32279	0.601106
1763	-0.258565	0.445876	-1.06271	0.400822
1764	-0.270287	0.660734	-0.663523	-0.142243
1765	-0.135854	0.339586	-0.512461	0.43913
1766	-0.42909	0.631819	-0.756874	0.303652
1767	-0.402005	0.616958	-0.470004	0.423007
1768	-0.317554	0.356492	-0.387585	0.0775544
1769	-0.54022	0.489093	-0.188409	-0.316874
1770	-0.377685	0.646531	-0.278446	0.557362
1771	-0.367287	0.360569	-0.12758	0.435547
1772	-0.270521	0.643165	-0.137782	0.331961
1773	-0.401786	0.502143	-0.902626	0.0612119
1774	-0.262108	0.636677	-0.500005	0.181398
1775	-0.370665	0.379487	-0.564206	0.548491
1776	-0.341703	0.640117	-0.614286	0.475117
1777	-0.290242	0.406701	-0.547601	-0.028461
1778	-0.554867	0.499148	-0.152693	-0.0988022
1779	-0.385921	0.335718	-0.150117	-0.232123
1780	-0.351125	0.467997	-0.159781	0.406722
1781	-0.320126	0.692201	-0.302404	0.0504465
1782	-0.218772	0.484499	-0.392477	-0.101782
1783	-0.447986	0.506747	-0.661001	0.26883
1784	-0.385137	0.496692	-0.967042	-0.492201
1785	-0.292669	0.597149	-0.564471	-0.150682
1786	-0.272574	1.05063	-0.636781	-0.270805
1787	-0.0347658	0.571225	-0.561875	-0.455553
1788	-0.376247	0.733511	-0.811837	-0.414478
1789	-0.430721	0.654798	-0.787114	-0.117799
1790	-0.275629	0.589724	-0.620592	-0.0439647
1791	-0.141212	0.751039	-0.580753	0.151005
1792	-0.0524222	0.604219	-0.574028	-0.264468
1793	-0.271811	0.585105	-0.829305	-0.318498
1794	-0.335871	0.544814	-0.588294	0.247178
1795	-0.207915	0.732391	-0.708476	0.107796
1796	-0.283189	0.732889	-0.926206	-0.597606
1797	-0.339497	0.749503	-0.516863	-0.0470276
1798	-0.204497	0.813349	1.29011	0.100031
1799	-0.548231	0.55391	-1.1058	0.242808
1800	-0.247468	0.754002	-0.79191	-0.381175
1801	0.00672046	0.822353	-0.756788	-0.138626
1802	-0.0661242	0.60164	-0.568092	-0.0342162
1803	-0.153643	0.591627	-0.997364	0.0922711
1804	-0.334454	0.458441	-0.539809	0.236821
1805	-0.227902	0.605266	-0.547462	0.236801
1806	-0.449836	0.44995	-1.11772	0.566291
1807	-0.275594	0.367526	-0.84266	0.199576
1808	-0.446542	-0.40464	-0.609293	0.501245
1809	-0.0496129	0.0903496	-0.710943	0.025499
1810	-0.153687	-0.466017	-0.448877	0.226122
1811	-0.496441	-0.413186	-0.677957	0.00603355
1812	-0.127109	0.0824455	-0.612527	0.196357
1813	-0.0955116	-0.0909313	-0.383207	0.254242
1814	-0.0486932	-0.16114	-0.406785	0.213734
1815	-0.340306	-0.234895	-0.90395	-0.0570456
1816	-0.413577	-0.0670714	-0.717741	0.443675
1817	-0.185459	-0.0287273	-0.780427	-0.312129
1818	-0.074368	0.615636	-0.556673	0.41302
1819	0.129836	-0.160797	-0.400126	0.287431
1820	-0.343734	-0.237922	-0.567198	0.591395
1821	-0.0694653	-0.389154	-0.338428	0.327912
1822	-0.0996183	-0.035584	-0.926098	0.14648
1823	0.0384369	-0.346973	-0.460954	0.509838
1824	-0.0680456	-0.157894	-0.63089	0.239484
1825	0.0360898	-0.308994	-0.313049	0.0785806
1826	-0.266886	-0.0938752	-0.587452	0.109091
1827	0.134746	-0.281392	-0.954095	0.199176
1828	0.134779	-0.424008	-0.537708	0.675868
1829	0.399059	0.00429625	-0.676069	0.270023
1830	0.231952	-0.413336	-0.556237	-0.000270282
1831	0.0243918	0.03276	-0.656614	0.0877869
1832	-0.354819	-0.249126	-0.871443	0.238826
1833	-0.0204031	-0.0505352	-0.307078	-0.339369
1834	0.112893	-0.201503	-1.00498	0.439082
1835	0.196816	-0.0537417	-0.988257	0.204049
1836	0.011691	0.023685	-0.74887	-0.00744514
1837	0.163915	-0.270763	-0.761114	0.287983
1838	-0.0557918	-0.287088	-0.900117	0.211109
1839	0.181434	-0.147379	-0.654533	0.229058
1840	-0.023024	-0.24702	-0.818543	0.101712
1841	0.0818277	-0.0990669	-0.786021	-0.333163
1842	0.00685102	-0.276456	-0.458809	0.0278011
1843	0.11974	-0.274547	-0.354371	-0.0743979
1844	-0.117888	-0.461399	-0.35888	-0.254904
1845	0.037984	-0.207378	-0.263252	0.510429
1846	0.409687	-0.308872	-0.556959	0.314948
1847	-0.161492	-0.0774484	-0.825337	0.0852808
1848	0.00201245	-0.115346	-1.10211	-0.151395
1849	-0.065284	-0.341436	-0.864678	-0.10774
1850	-0.00781015	-0.260971	-0.33136	-0.0968783
1851	-0.0914631	-0.201554	-0.760464	0.0818056
1852	0.114875	-0.285923	-0.535668	-0.195079
1853	0.00413728	-0.108475	-0.557867	0.136282
1854	-0.101731	-0.399581	-0.665476	0.224487
1855	0.0620582	-0.300532	-0.88148	0.14863
1856	0.103907	-0.10724	-0.819137	-0.318819
1857	-0.184174	-0.27564	-0.84447	-0.00273481
1858	0.00203694	-0.0951275	-0.45978	0.0487146
1859	-0.0565587	-0.125735	-1.22678	-0.00199264
1860	-0.151471	-0.093803	-1.00603	-0.00760081
1861	-0.316307	-0.295657	-0.93607	-0.181886
1862	-0.0756375	-0.424715	-0.564912	0.273146
1863	-0.160681	-0.255042	-0.441855	0.331642
1864	0.159901	-0.191243	-0.571346	-0.101394
1865	0.00669176	-0.206413	-0.611649	0.154001
1866	0.265565	-0.15305	-0.764332	0.581976
1867	-0.381315	-0.108229	-0.688079	0.0352247
1868	-0.385798	0.228888	-0.64123	-0.181216
1869	-0.712941	1.22815	-0.99304	-0.0860448
1870	-0.557048	0.440982	-1.04198	-0.265072
1871	-0.400446	0.558251	-1.25569	0.546592
1872	-0.398119	0.569129	-0.653317	0.0978589
1873	-0.736406	0.340988	-0.634491	-0.0246283
1874	-0.399171	0.36523	-0.609225	0.312298
1875	-0.55546	0.434752	-0.743151	0.260948
1876	-0.292492	0.463623	-1.0387	-0.0450581
1877	-0.483901	0.589063	-0.742575	-0.164493
1878	-0.556066	0.321486	-0.981865	-0.036019
1879	-0.42475	0.315268	-1.06718	0.299193
1880	-0.613208	0.296139	-0.875915	-0.0875745
1881	-0.539427	0.244888	-0.767507	0.191165
1882	-0.643165	0.32215	-0.743391	-0.539175
1883	-0.588925	0.649314	-0.786258	-0.63244
1884	-0.471677	0.645396	-0.803725	0.178757
1885	-0.618164	0.252317	-0.202564	0.0162686
1886	-0.409873	0.449984	-1.01979	0.399363
1887	-0.491154	0.618638	-0.787758	0.155532
1888	-0.564786	0.252288	0.0286865	-0.304872
1889	-0.184532	0.555996	-0.95564	0.24274
1890	-0.60332	0.381062	-0.742894	-0.00219325
1891	-0.400551	0.552696	-0.655411	-0.155075
1892	-0.659766	0.486341	-0.643963	-0.0389729
1893	-0.434855	0.262546	-1.06115	1.08478
1894	-0.730855	0.377453	-0.913954	0.141172
1895	-0.498955	0.362503	-0.731444	0.641079
1896	-0.3742	0.18847	-0.990677	0.27591
1897	-0.493609	0.390612	-0.41196	-0.0563654
1898	-0.289573	0.293306	-0.38766	-0.136537
1899	-0.217396	0.244854	-0.501912	-0.169629
1900	-0.637102	0.302701	-0.913074	0.327602
1901	-0.432228	0.329846	-0.652528	-0.10533
1902	-0.538956	0.0636655	-0.248235	0.189608
1903	-0.558915	0.298484	-0.501961	-0.342817
1904	-0.445325	0.50266	-0.396591	0.0949441
1905	-0.695934	0.389574	-0.785099	0.114421
1906	-0.444812	0.756088	-0.394008	-0.269609
1907	-0.564786	0.43334	-0.62983	-0.200349
1908	-0.372066	0.860168	-0.724033	0.461411
1909	-0.585936	0.396139	-1.17064	-0.0937845
1910	-0.59819	0.283427	-0.775812	-0.0571226
1911	-0.560948	0.0764506	-0.597777	-0.068865
1912	-0.464353	0.13987	-1.1845	-0.181433
1913	-0.482509	0.0170045	-0.320739	0.451827
1914	-0.566843	-0.358097	-0.420271	0.0579111
1915	-0.638044	0.120847	-1.57373	-0.0292921
1916	-0.40674	-0.0532439	-0.588591	-0.409527
1917	-0.397147	0.0995419	-0.504414	-0.0264423
1918	-0.429307	-0.228429	-1.09554	0.710413
1919	-0.557865	0.195487	-0.791521	0.0594449
1920	-0.0363755	0.805821	-0.532965	0.494042
1921	-0.512134	0.0959442	-0.924981	0.0989697
1922	-0.563564	0.399125	-0.181677	0.267227
1923	-0.545502	-0.231861	-1.70992	-0.409229
1924	-0.555316	0.359232	-0.638483	-0.197535
1925	-0.50362	0.246144	-0.47765	-0.0565755
1926	-0.349076	0.337896	-0.611694	0.0585546
1927	-0.423073	0.22206	-0.60888	-0.0928804
1928	0.135782	0.514865	-0.427831	0.212936
1929	-0.0379145	0.0173896	-1.0387	0.288454
1930	-0.0475789	0.468777	-0.436347	-0.300115
1931	-0.153804	0.164904	-0.642559	0.261115
1932	0.238941	0.175067	-0.929952	0.0181039
1933	0.166397	0.274234	-1.26749	-0.868486
1934	0.0500585	-0.0209644	-0.553383	0.052247
1935	0.030444	0.163133	-0.00628589	0.608097
1936	0.0995742	0.16923	0.157731	-0.666351
1937	-0.0955957	0.11654	-0.949969	0.363426
1938	-0.0939135	0.217924	0.59599	0.533654
1939	0.113352	0.0787103	-0.856797	-0.103995
1940	0.158081	0.132138	-1.04029	-0.135171
1941	0.128754	0.0815494	-1.01822	0.383452
1942	-0.0040411	0.109722	-0.685784	0.123026
1943	-0.0128688	-0.0456836	-0.539709	0.134385
1944	-0.0378503	0.029115	-0.817909	-0.0135683
1945	-0.113246	-0.0228798	-0.0243919	0.307851
1946	0.0663668	0.101988	-0.746268	0.189615
1947	0.0251311	0.135325	-0.898543	0.184839
1948	-0.0660658	0.012453	-0.173593	0.0430109
1949	-0.0393117	0.0892995	-0.625906	0.194877
1950	0.00922371	0.00461281	-0.483572	0.143677
1951	0.0706757	0.0460472	-0.961295	0.269179
1952	0.234735	0.082585	-0.493823	0.124284
1953	0.126683	-0.00725026	-0.267266	0.189318
1954	0.121254	0.100757	-0.131554	0.900045
1955	0.0987949	0.00191453	-0.145407	0.357615
1956	-0.0807085	0.184146	-0.128865	0.669567
1957	0.140531	-0.0317622	-0.313193	0.505132
1958	0.0997137	0.149122	-0.308807	0.348958
1959	0.0793359	0.112835	-0.174136	0.515266
1960	0.017012	0.00430052	-0.203858	0.61367
1961	0.179164	0.211887	-0.370807	0.0481582
1962	-0.111164	0.314919	-0.571752	0.0931554
1963	0.0829475	0.123343	-0.591241	0.457695
1964	0.0929853	0.207179	-0.458988	0.330188
1965	-0.115442	0.190658	-0.221776	0.223317
1966	-0.0262092	0.216449	-0.527947	0.0343751
1967	-0.0691782	0.158355	-0.408755	0.382909
1968	0.0299893	0.305284	-0.368621	0.388154
1969	0.0741924	0.107193	-0.458766	0.096922
1970	0.00935803	0.446391	-0.550764	0.459948
1971	-0.0168347	0.198074	-0.523959	0.390579
1972	0.0828705	0.112892	-0.0564105	0.236635
1973	0.314741	0.941975	-0.335893	0.426532
1974	-0.103791	0.292532	-0.621099	0.0579939
1975	0.0419309	0.0506553	-0.549823	0.437881
1976	0.00736525	0.346974	-0.585477	0.275223
1977	0.0593806	0.334457	-0.522794	0.394697
1978	0.0830504	0.0327615	-0.663892	0.355806
1979	0.200904	0.152625	-0.596484	0.241454
1980	0.0315462	0.023079	-0.428951	0.239078
1981	0.175857	-0.116154	-0.264443	0.328932
1982	0.174339	0.438791	-0.809246	-0.306163
1983	0.274208	-0.00994153	-0.346438	0.455325
1984	0.145614	0.276191	-0.810096	-0.123902
1985	0.0687758	-0.031715	-0.653022	0.220915
1986	-0.0430235	0.5577	-0.591068	0.434915
1987	-0.152225	-0.107896	-0.544656	0.264316
1988	0.101408	0.16821	-0.588185	0.643945
1989	0.186866	0.0654182	-0.73434	0.53733
1990	0.104338	0.159652	-1.09617	0.203049
1991	-0.0608383	0.368686	-0.581495	0.421613
1992	0.121425	0.397552	-0.553103	0.452536
1993	-0.0454492	0.496823	-0.750756	0.889494
1994	-0.149527	0.419499	-0.590217	0.495325
1995	-0.0132285	0.161504	-0.387482	0.810627
1996	0.255326	0.354778	-0.536962	0.557413
1997	0.0860127	0.547694	-0.339817	0.562949
[truncated: 2,413 more rows]
